# Supplementary material for: Benzoyl methyl phosphates as efficient reagents in the one-pot tandem approach for the synthesis of 2-phenylbenzimidazoles in water
Source: Royal Society of Chemistry journal article supplement (doi:10.1039/c3ra46749j), 2013-11-29

## Supporting Information

### **Benzoyl methyl phosphates as efficient reagents in the one-pot tandem approach for the synthesis of 2-phenylbenzimidazoles in water**

Hidemasa Hikawa,\* Maki Imani, Hideharu Suzuki, Yuusaku Yokoyama and Isao Azumaya\*

*Faculty of Pharmaceutical Sciences, Toho University, Funabashi, Chiba 274-8510, Japan*

*hidemasa.hikawa@phar.toho-u.ac.jp and isao.azumaya@phar.toho-u.ac.jp*

|                                                                                       |               |
|---------------------------------------------------------------------------------------|---------------|
| <b>1. Table of contents</b>                                                           | <b>S1</b>     |
| <b>2. Table S1. Preparation of benzoyl methyl phosphates 2.</b>                       | <b>S2</b>     |
| <b>2. Figure 1. Reaction progress.</b>                                                | <b>S3-S5</b>  |
| <b>3. Copies of <sup>1</sup>H and <sup>13</sup>C NMR spectra of the all compounds</b> | <b>S6-S51</b> |

**Table S1.** Preparation of benzoyl methyl phosphates **2**.

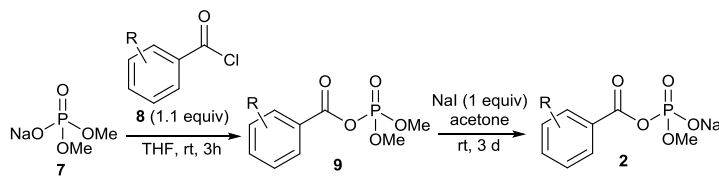

| R     | benzoyl dimethyl phosphates <b>9</b> | Yield (%) | benzoyl methyl phosphates <b>2</b> | Yield (%) |
|-------|--------------------------------------|-----------|------------------------------------|-----------|
| H     | <b>9a</b>                            | 87        | <b>2a</b>                          | 93        |
| 4-OMe | <b>9b</b>                            | 80        | <b>2b</b>                          | 90        |
| 4-Me  | <b>9c</b>                            | 73        | <b>2c</b>                          | 95        |
| 4-Cl  | <b>9d</b>                            | 45        | <b>2d</b>                          | 80        |
| 4-CN  | <b>9e</b>                            | 41        | <b>2e</b>                          | 93        |
| 2-OMe | <b>9f</b>                            | 66        | <b>2f</b>                          | 68        |
| 2-F   | <b>9g</b>                            | 80        | <b>2g</b>                          | 92        |
| 2-Cl  | <b>9h</b>                            | 46        | <b>2h</b>                          | 95        |
| 2-I   | <b>9i</b>                            | 83        | <b>2i</b>                          | 91        |

**Figure 1.** Reaction progress.

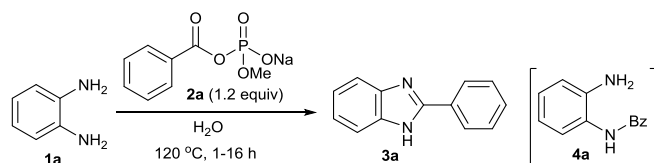

A mixture of 1,2-phenylenediamine **1a** (54.0 mg, 0.5 mmol) and benzoyl methyl phosphate **2a** (143 mg, 0.6 mmol) in H<sub>2</sub>O (2 mL) was heated at 120 °C for 1-16 h in a sealed tube. After the reaction mixture was cooled, *p*-nitroanisole (76.6 mg, 0.5 mmol, internal standard) was added to the reaction mixture, which was extracted with AcOEt. The organic layer was washed with brine, and concentrated in vacuo. The residue was analyzed by <sup>1</sup>H-NMR spectroscopy.

**1 h**

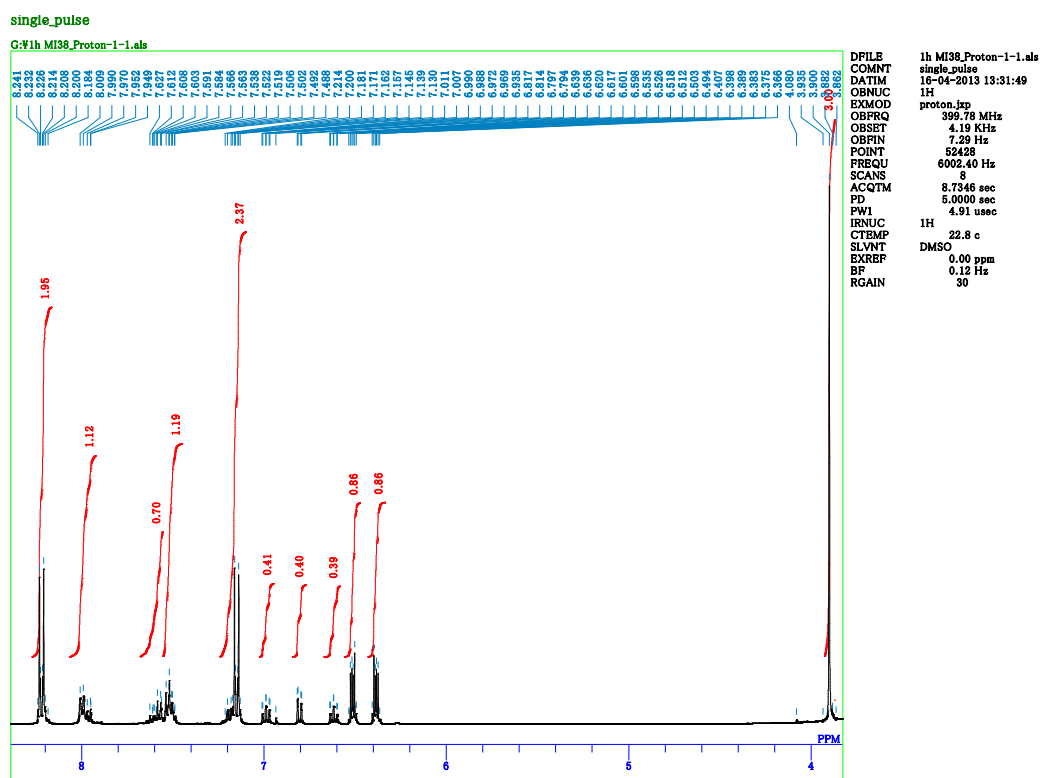

Conversion yield was calculated by integration.

|                  | SM <b>1a</b>        | Benzimidazole <b>3a</b> | Benzoyl <b>4a</b>   | <i>p</i> -nitroanisole<br>internal standard |
|------------------|---------------------|-------------------------|---------------------|---------------------------------------------|
| Signal $\delta$  | 6.5 (Ar- <u>H</u> ) | 8.2 (Ar- <u>H</u> )     | 6.8 (Ar- <u>H</u> ) | 3.9 (-OCH <sub>3</sub> )                    |
| Integral value   | 0.86 (2H)           | 0 (2H)                  | 0.40 (1H)           | 3.00 (3H)                                   |
| Amount (mmol)    | 0.215               | 0                       | 0.2                 |                                             |
| Calculated ratio | 43%                 | 0%                      | 40%                 | 76.6 mg (0.5 mmol)                          |

4 h

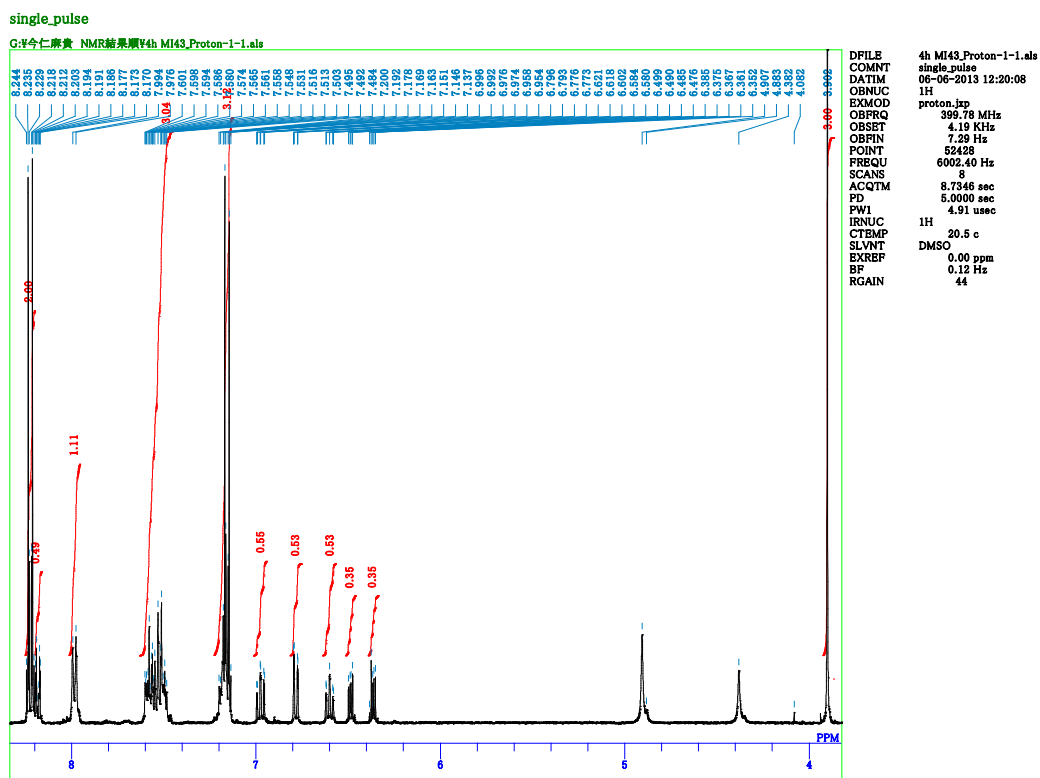

Conversion yield was calculated by integration.

|                  | SM <b>1a</b>        | Benzimidazole <b>3a</b> | Benzoyl <b>4a</b>   | <i>p</i> -nitroanisole<br><b>internal standard</b> |
|------------------|---------------------|-------------------------|---------------------|----------------------------------------------------|
| Signal $\delta$  | 6.5 (Ar- <b>H</b> ) | 8.2 (Ar- <b>H</b> )     | 6.8 (Ar- <b>H</b> ) | 3.9 (-O <b>CH</b> <sub>3</sub> )                   |
| Integral value   | 0.35 (2H)           | 0.49 (2H)               | 0.53 (1H)           | 3.00 (3H)                                          |
| Amount (mmol)    | 0.09                | 0.125                   | 0.265               |                                                    |
| Calculated ratio | 18%                 | 25%                     | 53%                 | 76.6 mg (0.5 mmol)                                 |

8 h

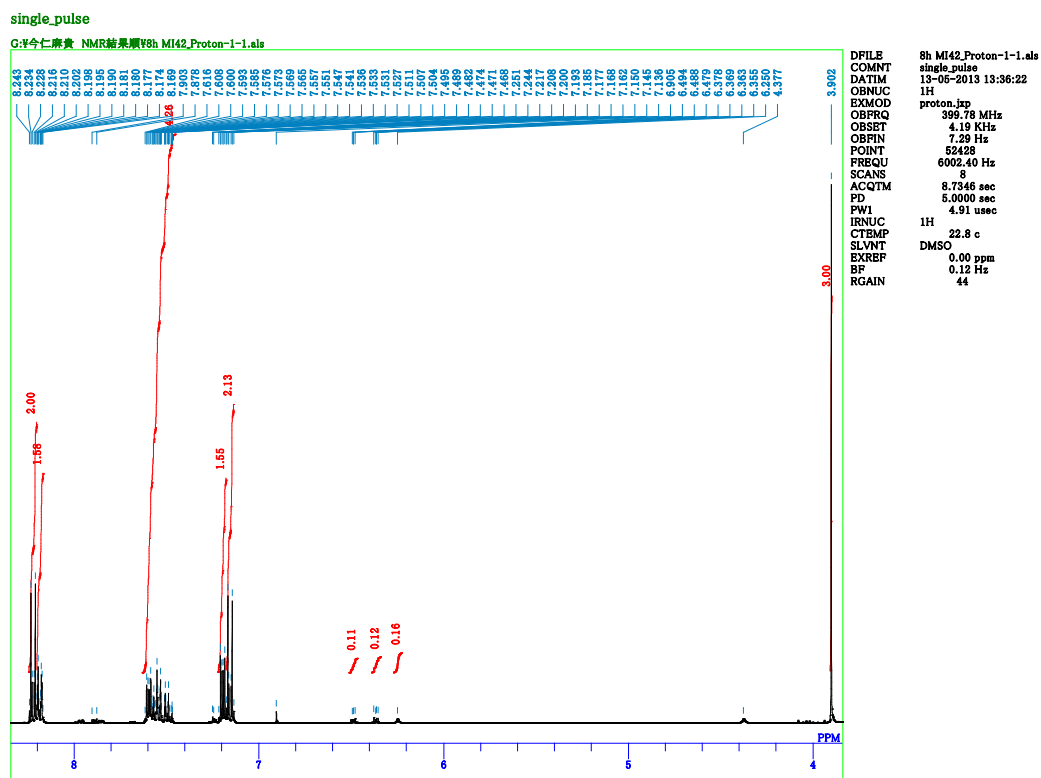

Conversion yield was calculated by integration.

|                  | SM 1a               | Benzimidazole 3a    | Benzoyl 4a          | <i>p</i> -nitroanisole<br>internal standard |
|------------------|---------------------|---------------------|---------------------|---------------------------------------------|
| Signal $\delta$  | 6.5 (Ar- <u>H</u> ) | 8.2 (Ar- <u>H</u> ) | 6.8 (Ar- <u>H</u> ) | 3.9 (-OCH <sub>3</sub> )                    |
| Integral value   | 0.11 (2H)           | 1.58 (2H)           | 0 (1H)              | 3.00 (3H)                                   |
| Amount (mmol)    | 0.03                | 0.395               | 0                   |                                             |
| Calculated ratio | 6%                  | 79%                 | 0%                  | 76.6 mg (0.5 mmol)                          |

### 2.17 MBP 2

G:\Yimani\2.17 MBP 2FT.als

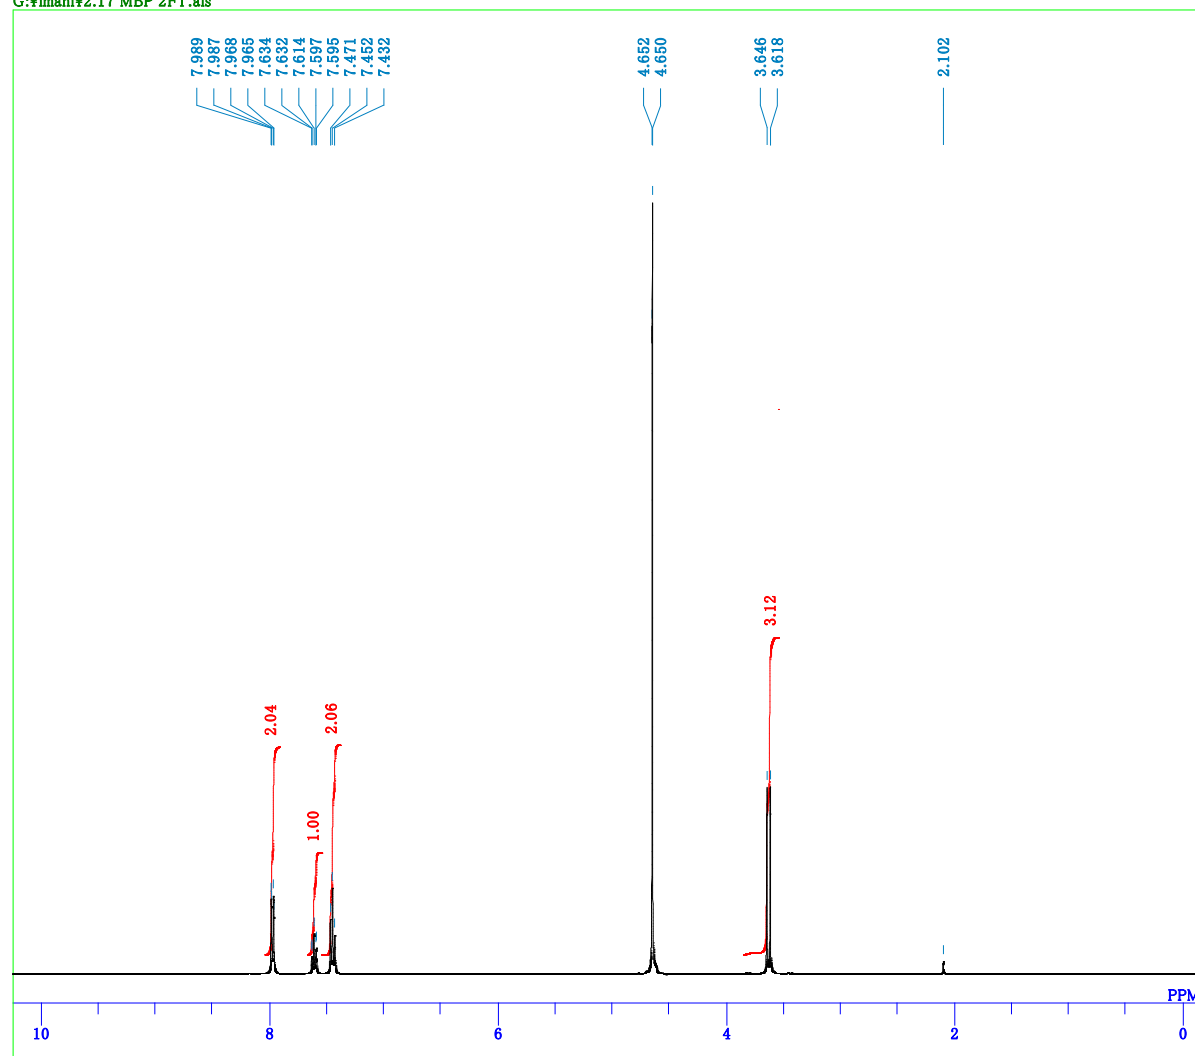

D2O  
EXREF  
BF  
RGAIN  
IRNUC  
CTEMP  
SLVNT  
EXREF  
BF  
RGAIN  
NON  
OBFREQ  
OBSSET  
OBFIN  
POINT  
FREQU  
SCANS  
ACQTM  
PD  
PW1  
IRNUC  
CTEMP  
SLVNT  
EXREF  
BF  
RGAIN

2.17 MBP 2FT.als  
2.17 MBP 2  
Fri Feb 17 14:34:39 2012  
1H  
NON  
399.65 MHz  
124.00 KHz  
11300.00 Hz  
65536  
6006.01 Hz  
8  
10.9117 sec  
1.0000 sec  
5.50 usec  
1H  
24.7 c  
D2O  
4.65 ppm  
0.50 Hz  
19

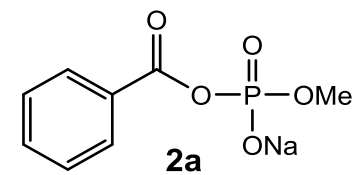

single pulse decoupled gated NOE

H:¥今仁麻貴 NMR結果順¥MI-11\_先生からもらったデータ使う。Carbon-1-1.als

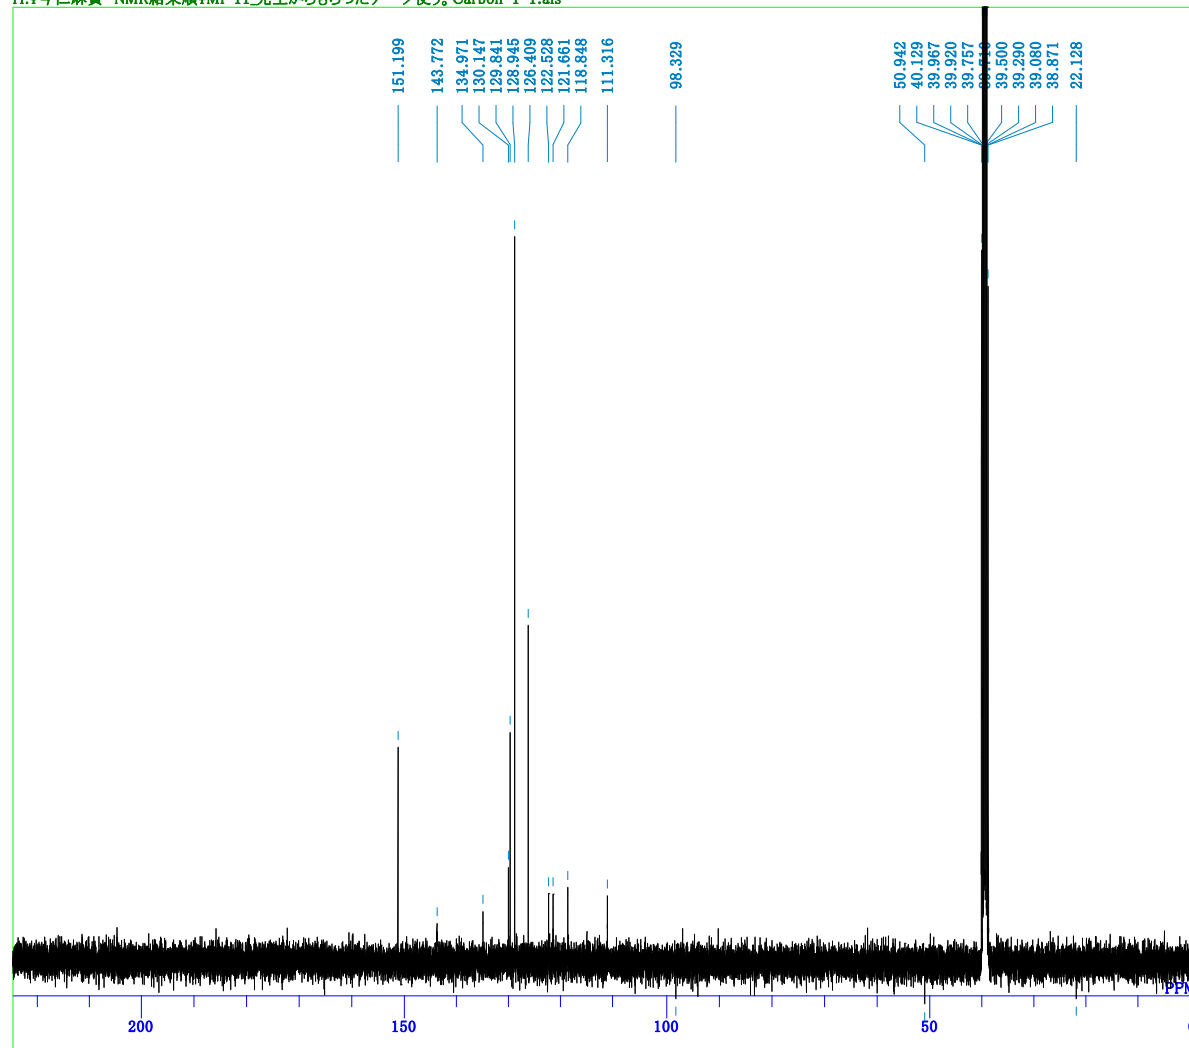

DFILE MI-11\_先生からもらったデータ使う。Ca  
COMNT single pulse decoupled gated NOE  
DATIM 06-03-2013 18:31:55  
OBNUC 13C  
EXMOD carbon.jxp  
OBFKQ 100.53 MHz  
OBSET 5.35 KHz  
OBFIN 5.86 Hz  
POINT 26214  
FREQU 25125.63 Hz  
SCANS 1024  
ACQTM 1.0433 sec  
PD 2.0000 sec  
PW1 2.67 usec  
IRNUC 1H  
CTEMP 23.7 c  
SLVNT DMSO  
EXREF 39.50 ppm  
BF 0.12 Hz  
RGAIN 60

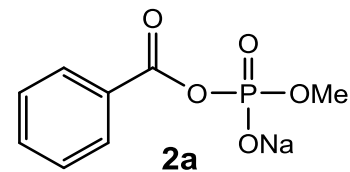

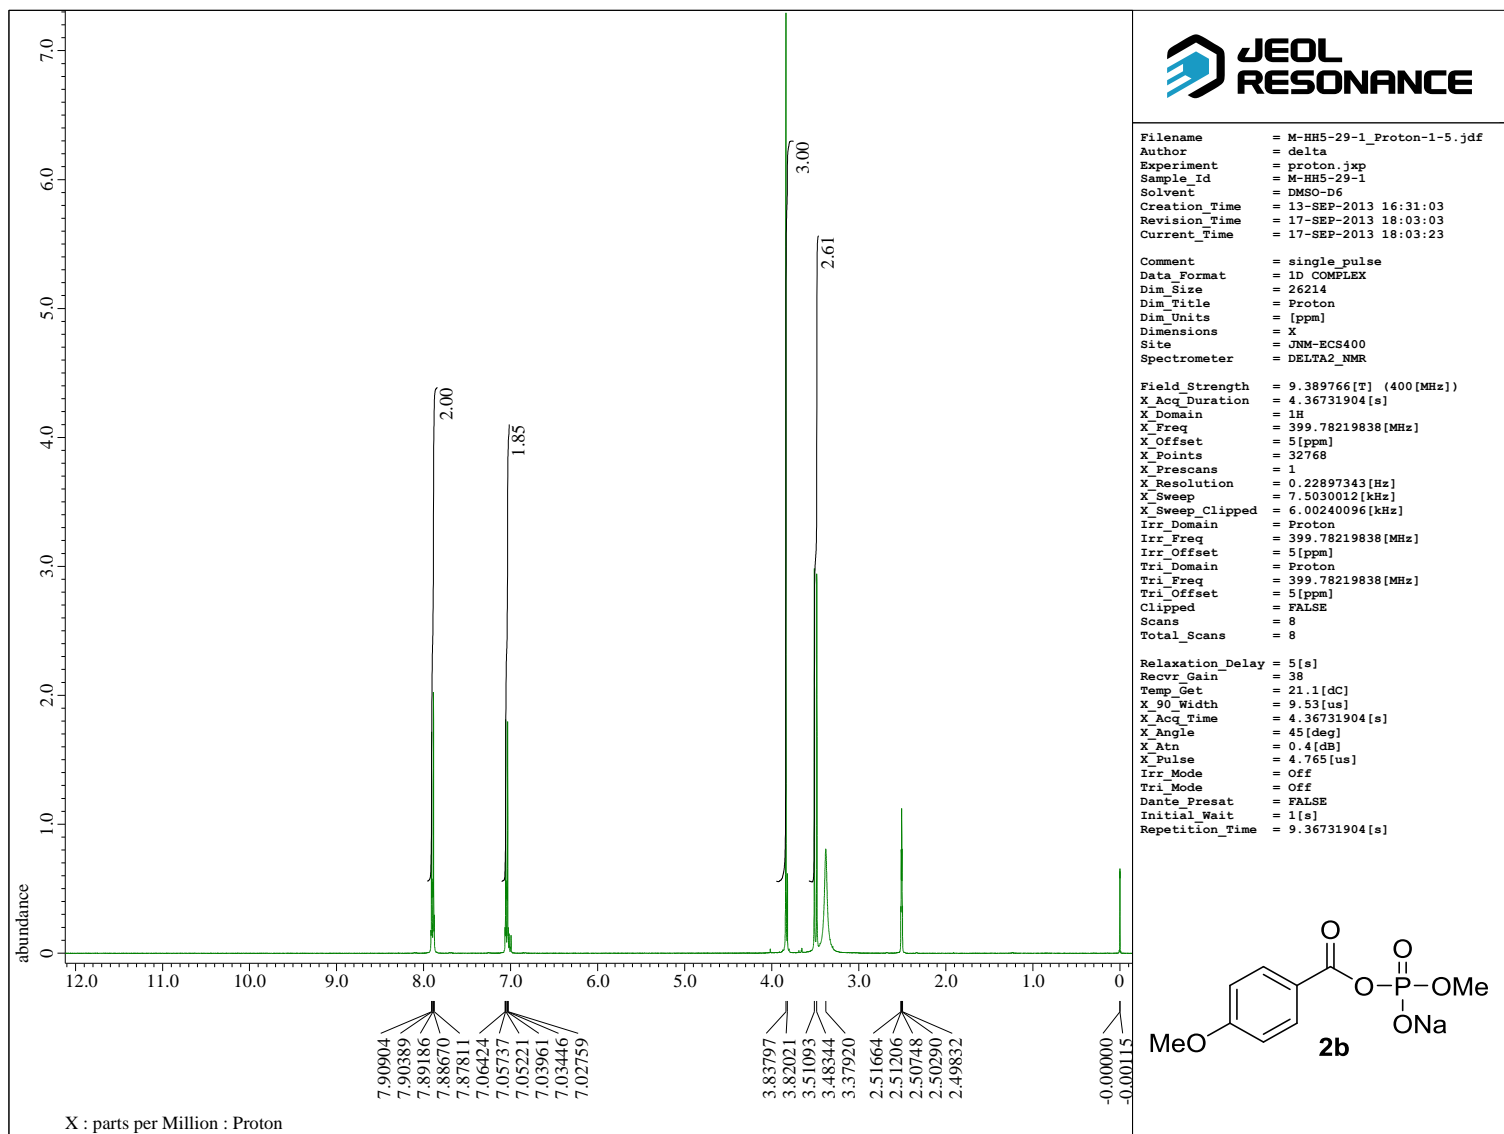



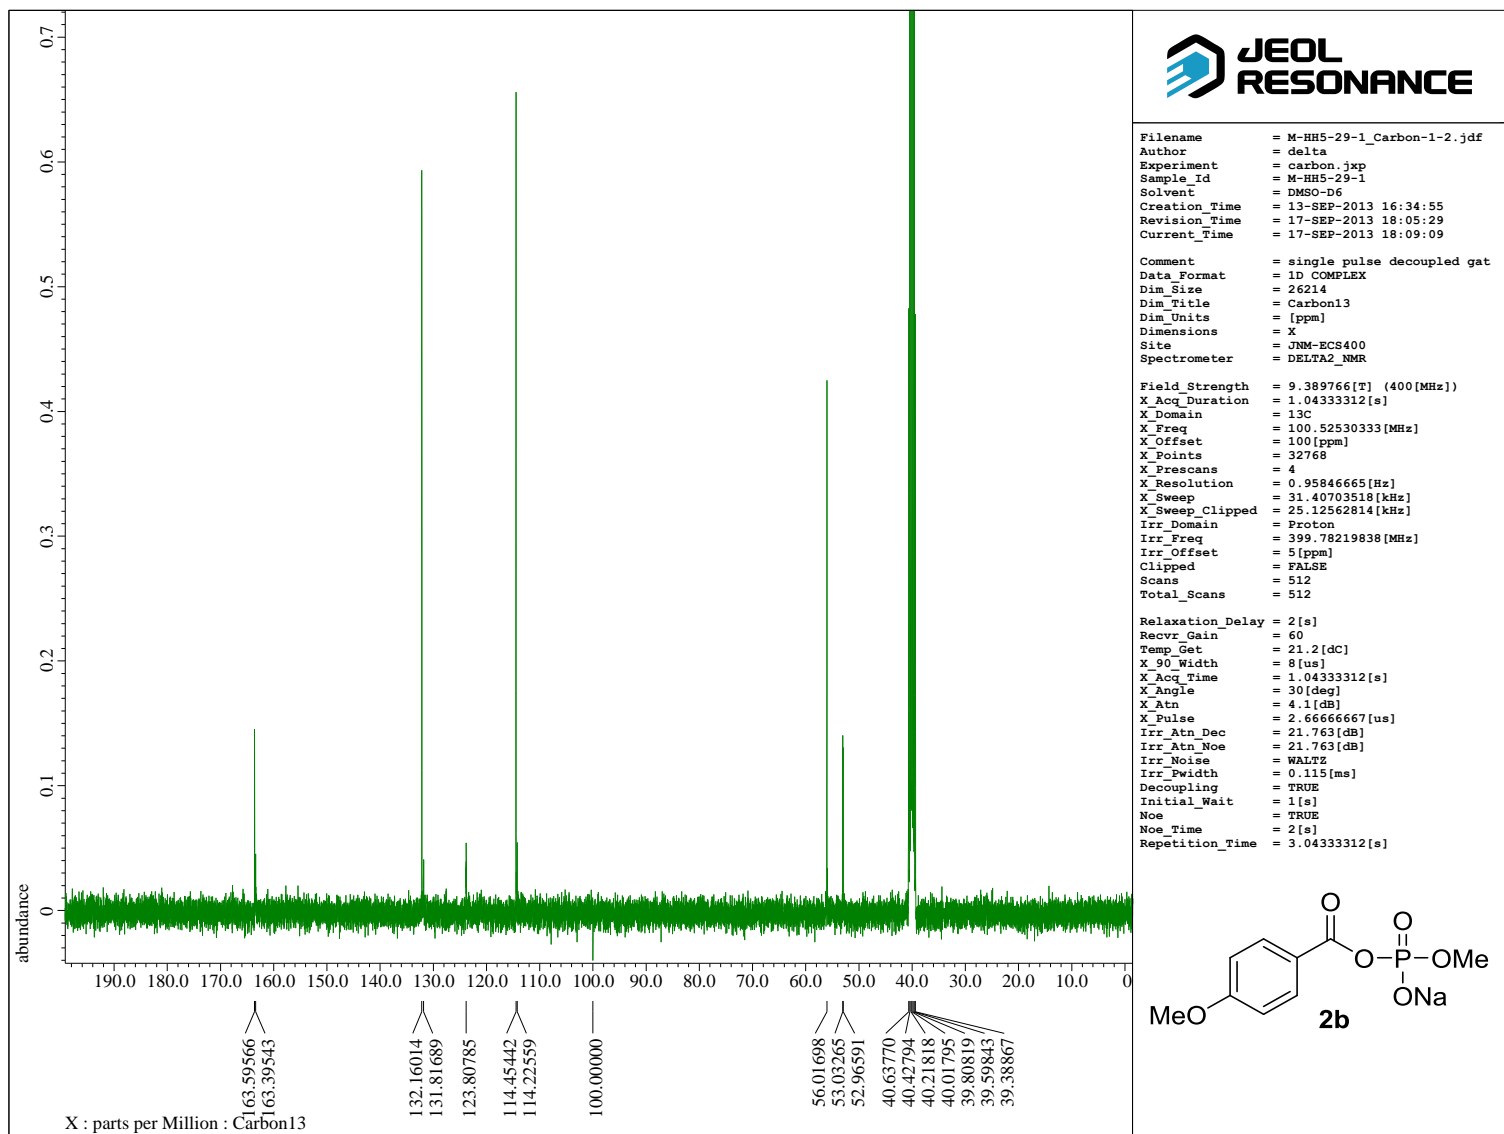

single\_pulse

G:\imani\ch3\_Proton-1-1解析.als

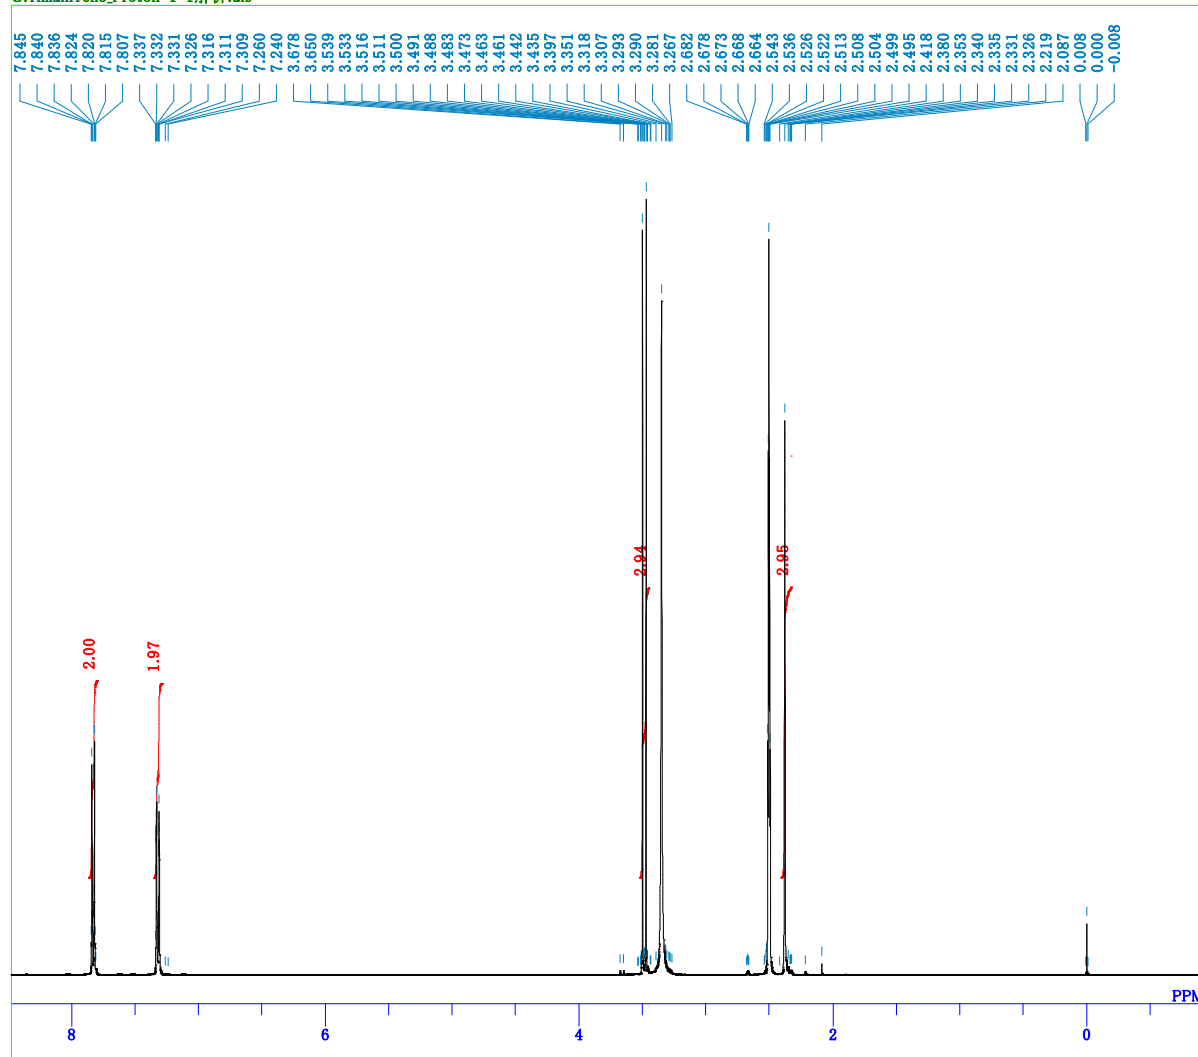

DFILE ch3\_Proton-1-1解析.als  
COMNT single\_pulse  
DATIM 22-01-2013 14:09:54  
OBNUC 1H  
EXMOD proton.jxp  
OBFRQ 399.78 MHz  
OBSET 4.19 KHz  
OBFIN 7.29 Hz  
POINT 52428  
FREQU 6002.40 Hz  
SCANS 8  
ACQTM 8.7346 sec  
PD 5.0000 sec  
PW1 4.91 usec  
IRNUC 1H  
CTEMP 22.3 c  
SLVNT DMSO  
EXREF 0.00 ppm  
BF 0.12 Hz  
RGAIN 42

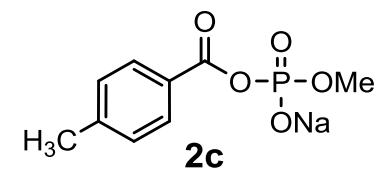

single pulse decoupled gated NOE

H:\imani\p-CH3新しいやつ\_Carbon-1-1.als

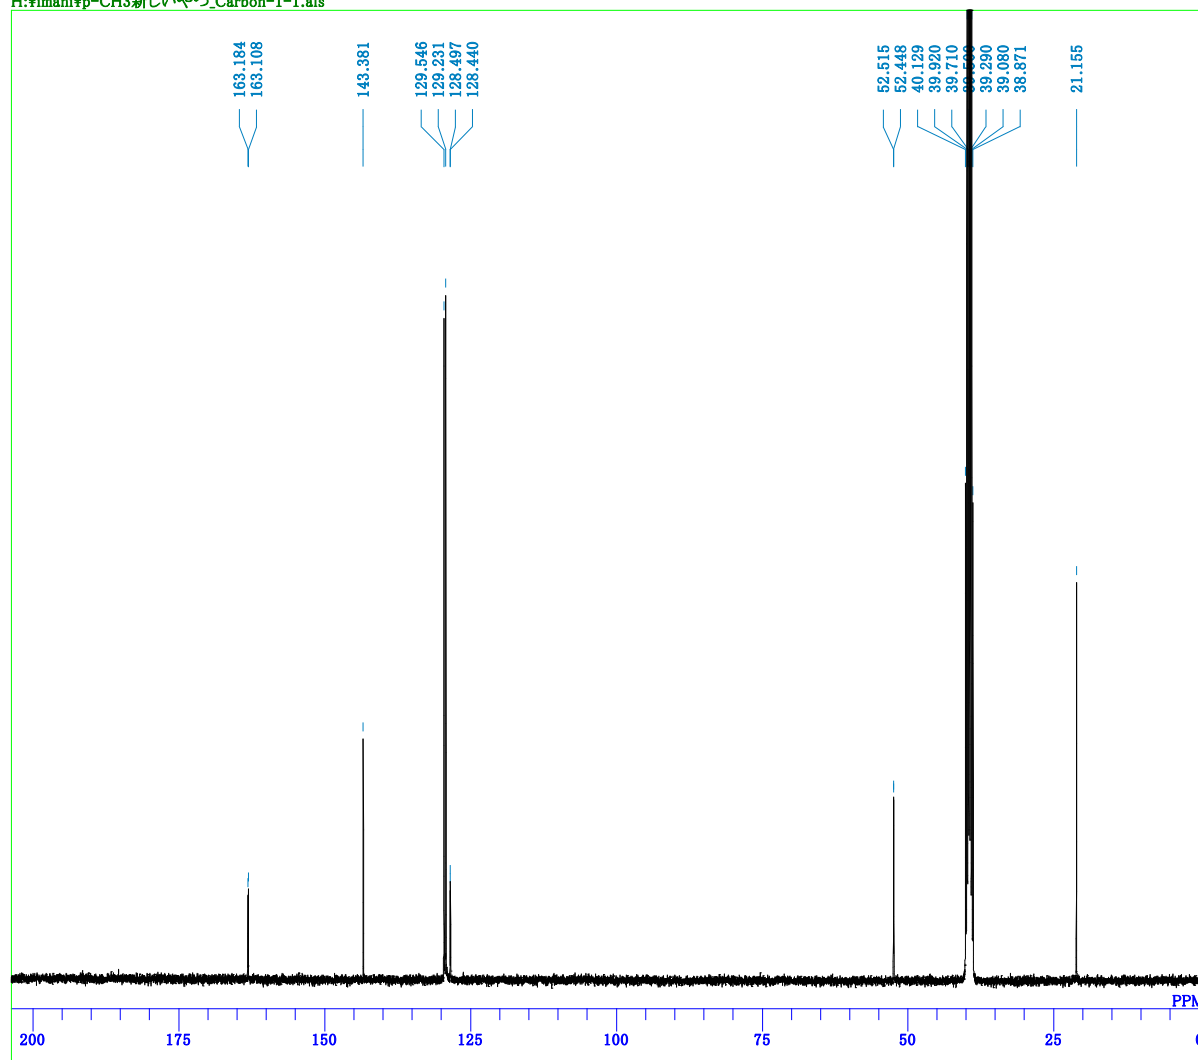

DFILE p-CH3新しいやつ\_Carbon-1-1.als  
COMNT single pulse decoupled gated NOE  
DATIM 14-08-2013 19:25:47  
OBNUC 13C  
EXMOD carbon.jp  
OBFRQ 100.53 MHz  
OBSET 5.35 KHz  
OBFIN 5.86 Hz  
POINT 26214  
FREQU 25125.63 Hz  
SCANS 3000  
ACQTM 1.0433 sec  
PD 2.0000 sec  
PW1 2.67 usec  
IRNUC 1H  
CTEMP 21.9 c  
SLVNT DMSO  
EXREF 39.50 ppm  
BF 1.20 Hz  
RGAIN 60

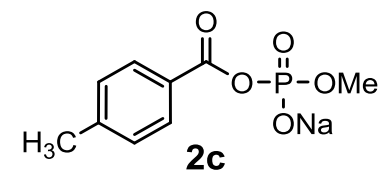

single\_pulse

G:\imani\Cl\_Proton-1-1解析.als

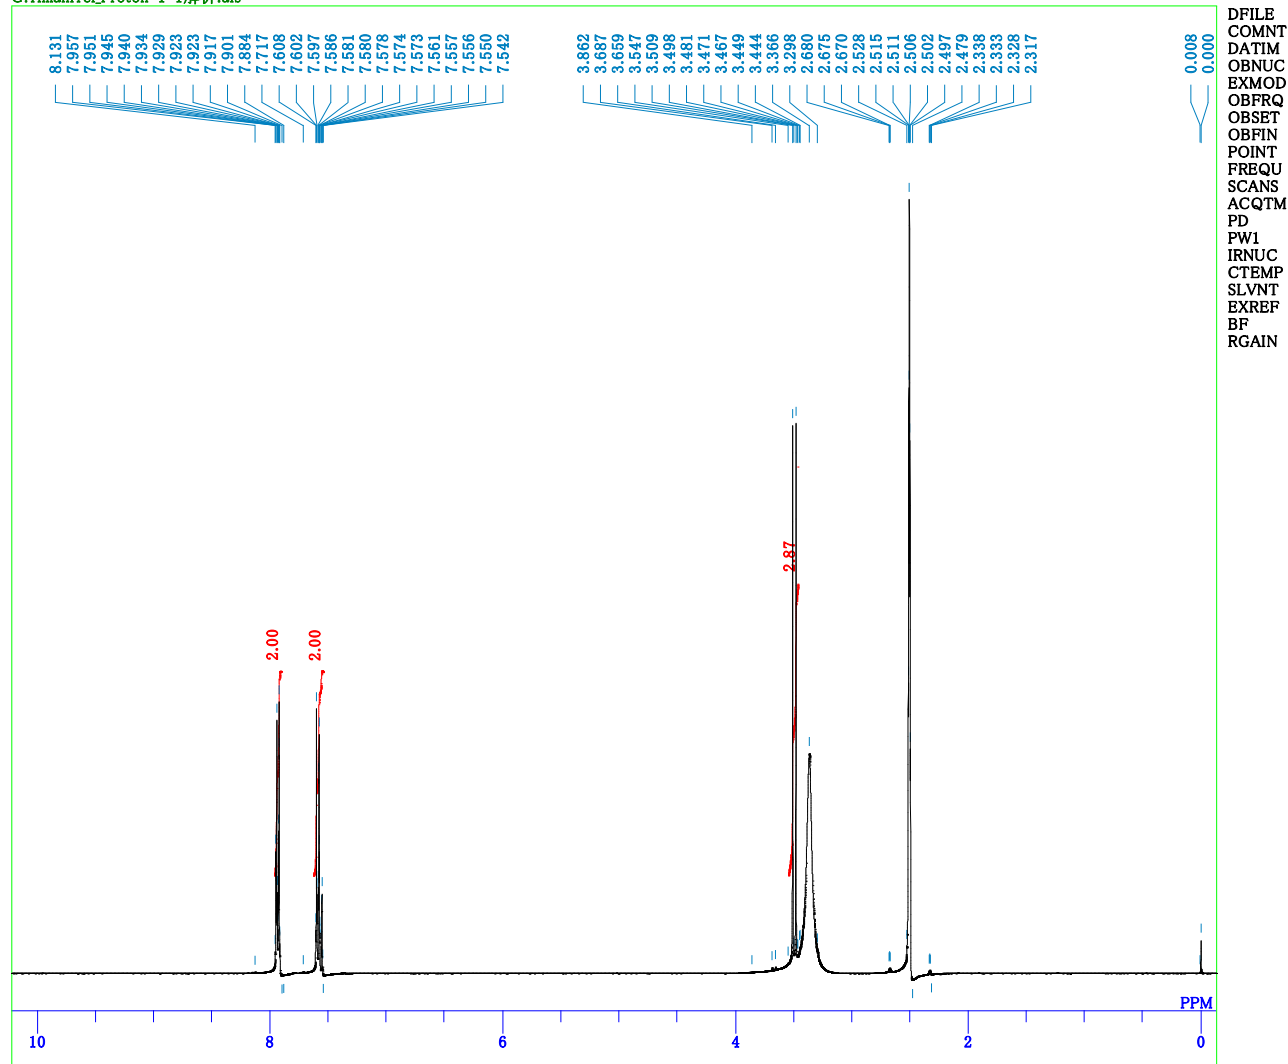

cl\_Proton-1-1解析.als  
single\_pulse  
22-01-2013 13:59:59  
1H  
proton.jxp  
399.78 MHz  
4.19 KHz  
7.29 Hz  
52428  
6002.40 Hz  
8  
8.7346 sec  
5.0000 sec  
4.91 usec  
1H  
22.3 c  
DMSO  
0.00 ppm  
0.12 Hz  
40

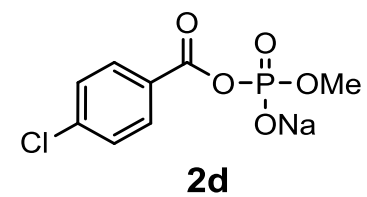

single pulse decoupled gated NOE

H:\imani\p-Cl新しいやつ\_Carbon-1-1.als

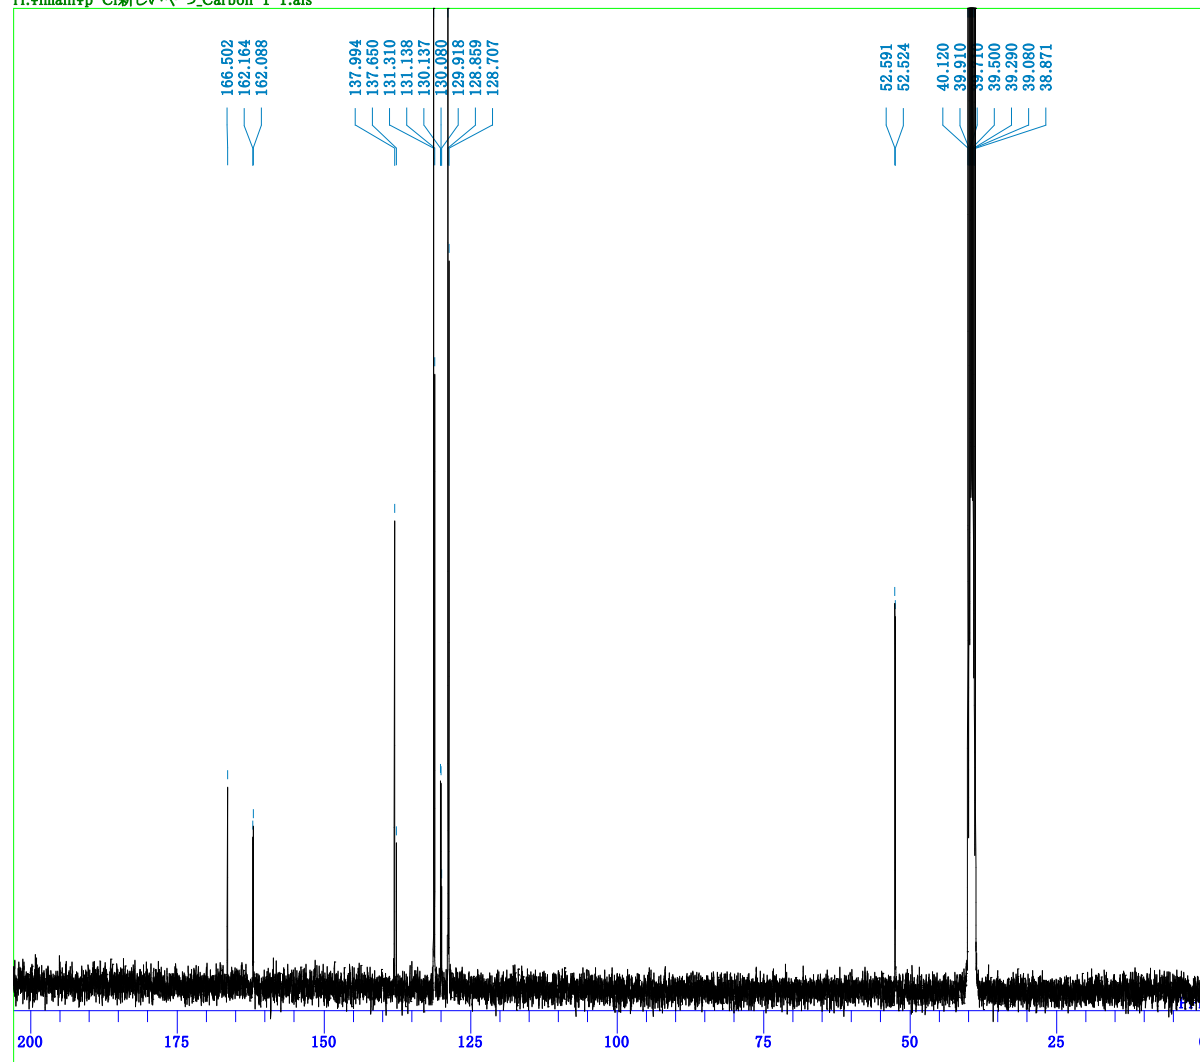

DFILE p-Cl新しいやつ\_Carbon-1-1.als  
COMNT single pulse decoupled gated NOE  
DATIM 14-08-2013 22:06:12  
OBNUC 13C  
EXMOD carbon.jxp  
OBFRQ 100.53 MHz  
OBSET 5.35 KHz  
OBFIN 5.86 Hz  
POINT 26214  
FREQU 25125.63 Hz  
SCANS 3000  
ACQTM 1.0433 sec  
PD 2.0000 sec  
PW1 2.67 usec  
IRNUC 1H  
CTEMP 22.2 c  
DMSO  
EXREF 39.50 ppm  
BF 1.20 Hz  
RGAIN 60

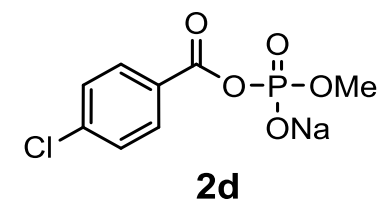

single\_pulse

G:\imani\cn\_Proton-1-1解析.als

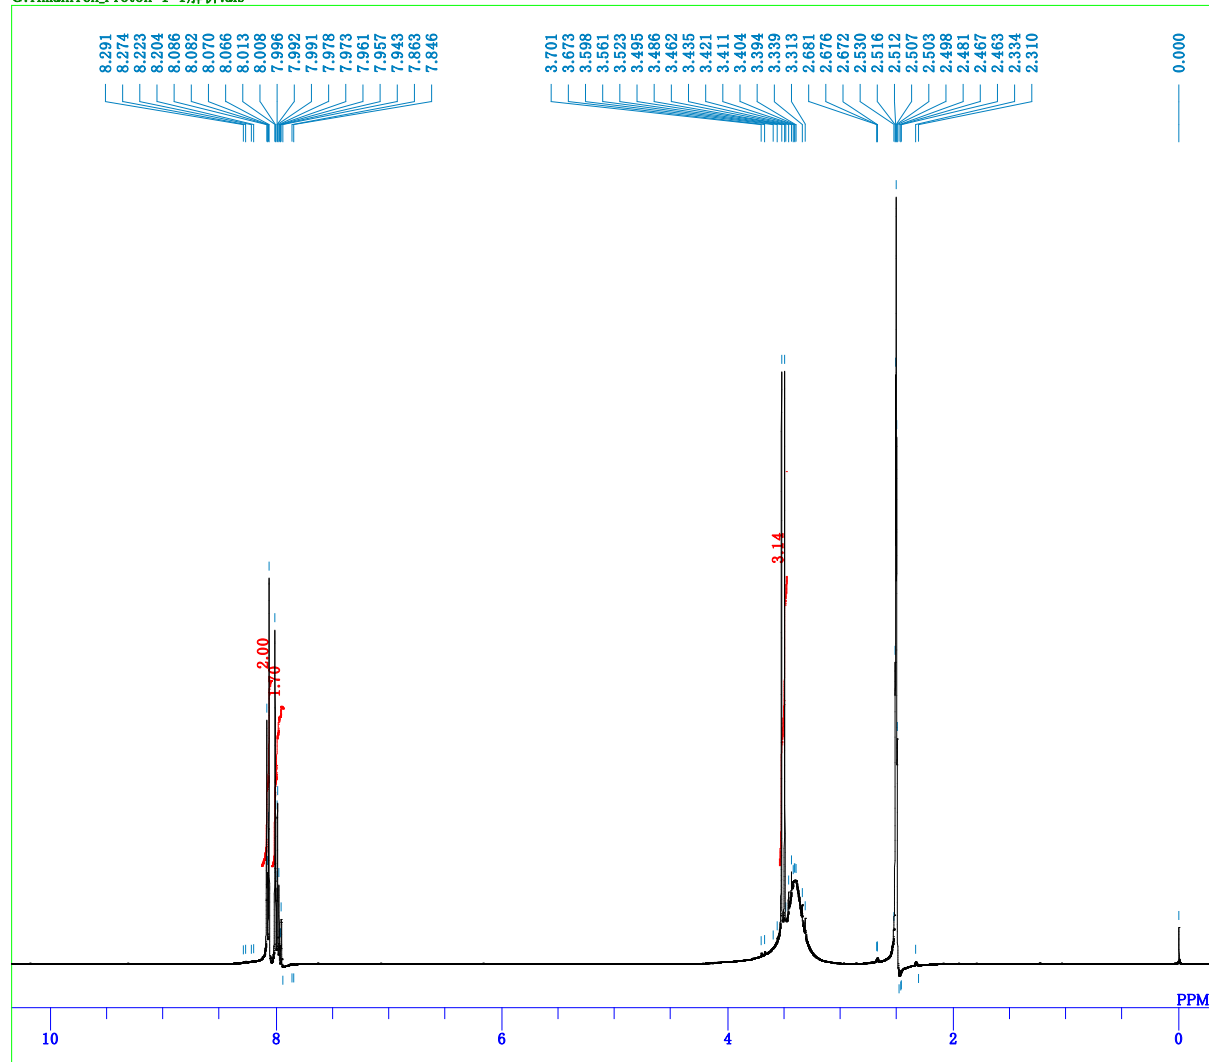

DFILE cn\_Proton-1-1解析.als  
COMNT single\_pulse  
DATIM 22-01-2013 14:19:43  
OBNUC 1H  
EXMOD proton.jxp  
OBFRQ 399.78 MHz  
OBSET 4.19 KHz  
OBFIN 7.29 Hz  
POINT 52428  
FREQU 6002.40 Hz  
SCANS 8  
ACQTM 8.7346 sec  
PD 5.0000 sec  
PW1 4.91 usec  
IRNUC 1H  
CTEMP 22.4 c  
SLVNT DMSO  
EXREF 0.00 ppm  
BF 0.12 Hz  
RGAIN 40

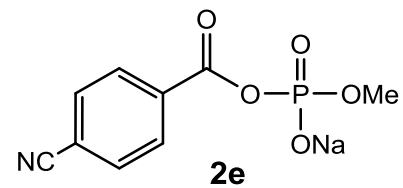

single pulse decoupled gated NOE

G:\imani\MI-CN\_Carbon-1-1.als

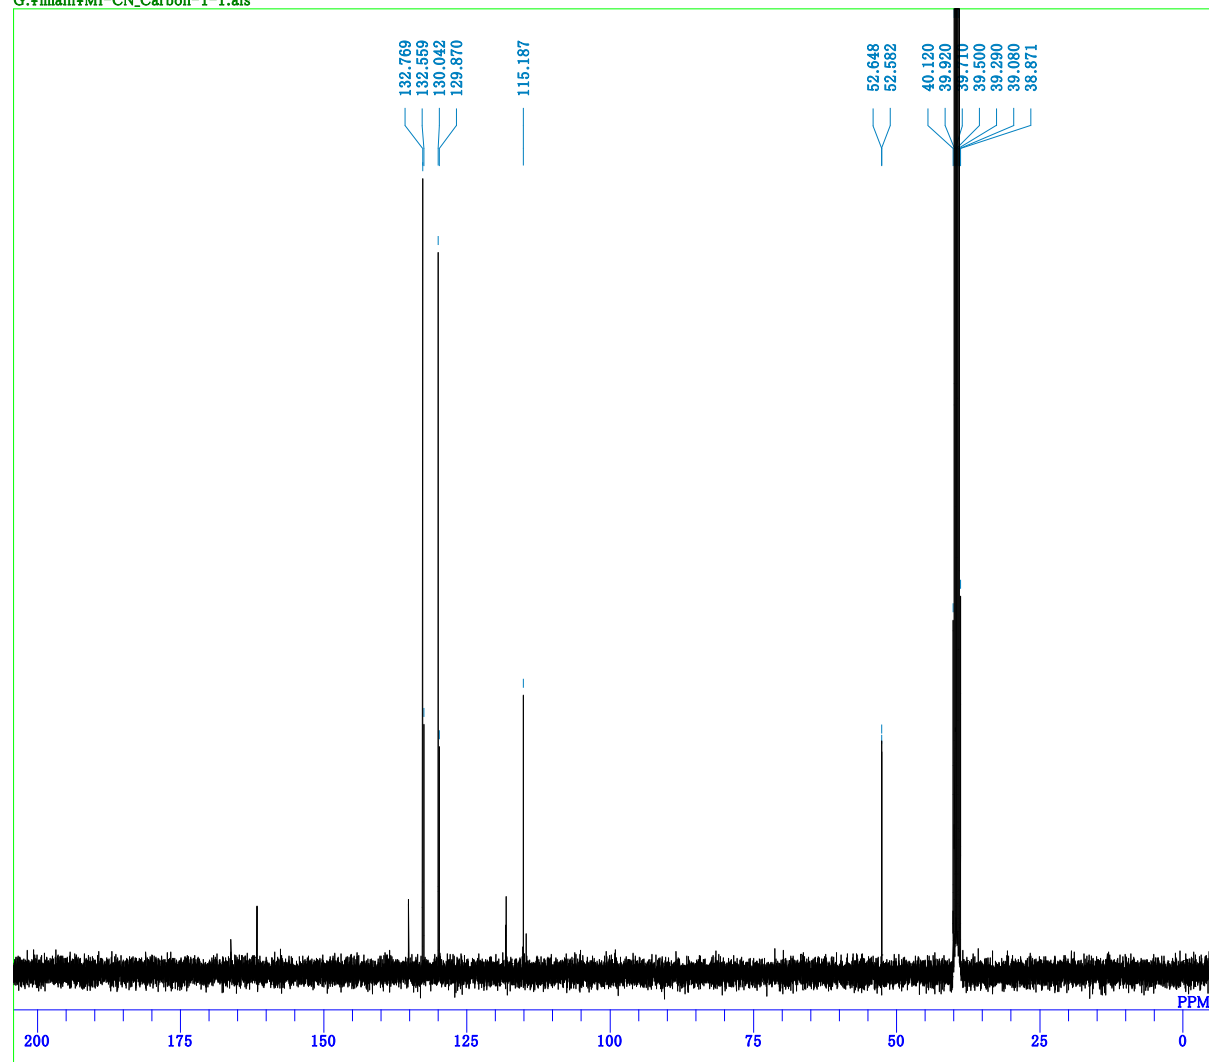

DFILE MI-CN\_Carbon-1-1.als  
COMNT single pulse decoupled gated NOE  
DATIM 07-03-2013 00:13:37  
OBNUC 13C  
EXMOD carbon\_jrp  
OBFRQ 100.53 MHz  
OBSET 5.35 KHz  
OBFIN 5.86 Hz  
POINT 26214  
FREQU 25125.63 Hz  
SCANS 512  
ACQTM 1.0433 sec  
PD 2.0000 sec  
PW1 2.67 usec  
IRNUC 1H  
CTEMP 23.8 c  
SLVNT DMSO  
EXREF 39.50 ppm  
BF 0.12 Hz  
RGAIN 60

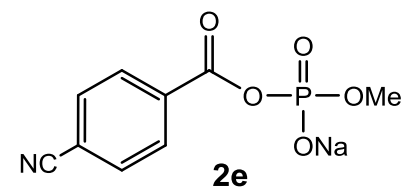

single\_pulse

G:\imani\Mlo-OMe\_Proton-1-1.als

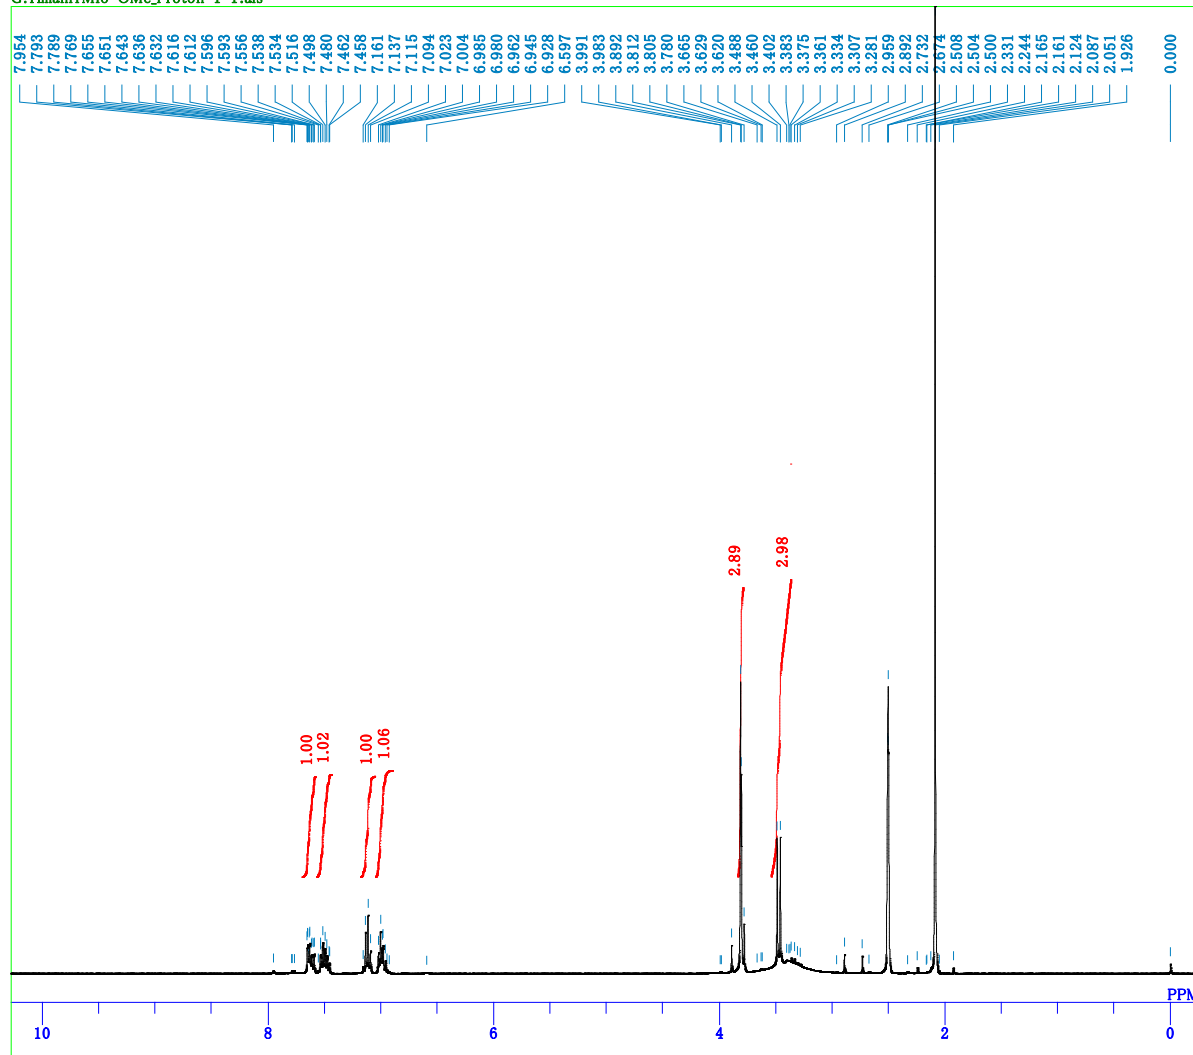

DFILE Mlo-OMe\_Proton-1-1.als  
COMNT single\_pulse  
DATIM 07-03-2013 13:44:44  
OBNUC 1H  
EXMOD proton.jxp  
OBFRQ 399.78 MHz  
OBSET 4.19 KHz  
OBFIN 7.29 Hz  
POINT 52428  
FREQU 6002.40 Hz  
SCANS 8  
ACQTM 8.7346 sec  
PD 5.0000 sec  
PW1 4.91 usec  
IRNUC 1H  
CTEMP 23.2 c  
SLVNT DMSO  
EXREF 0.00 ppm  
BF 0.12 Hz  
RGAIN 38

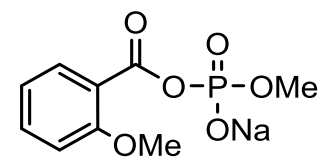

2f



single pulse decoupled gated NOE

H:\Yimani\Yo-OMeあたらしいやつ\_Carbon-1-1.als

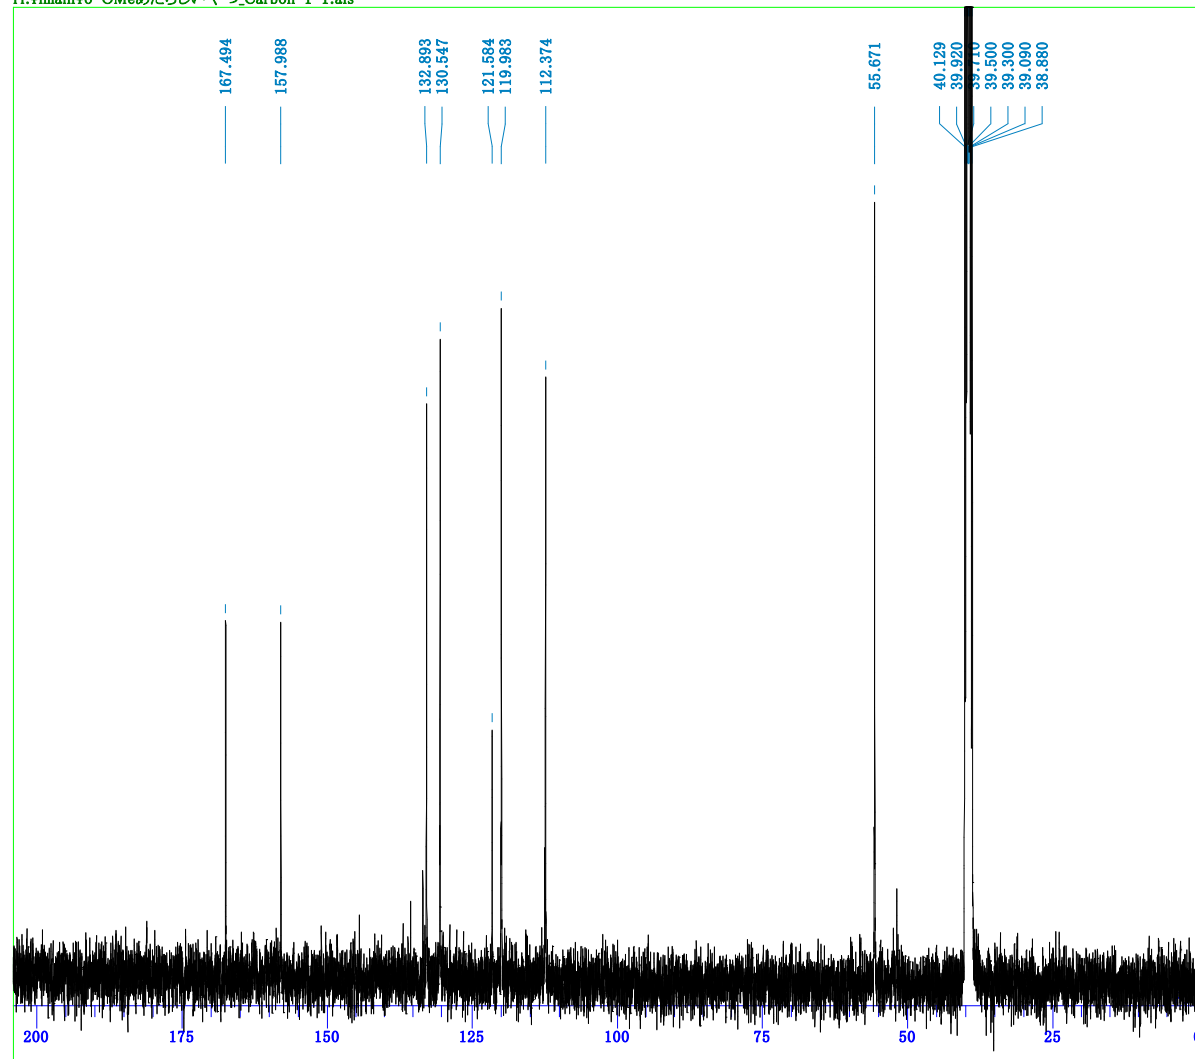

DFILE o-OMeあたらしいやつ\_Carbon-1-1.als  
COMNT single pulse decoupled gated NOE  
DATIM 15-08-2013 05:06:59  
OBNUC 13C  
EXMOD carbon.jp  
OBFRQ 100.53 MHz  
OBSET 5.35 KHz  
OBFIN 5.86 Hz  
POINT 26214  
FREQU 25125.63 Hz  
SCANS 1024  
ACQTM 1.0433 sec  
PD 2.0000 sec  
PW1 2.67 usec  
IRNUC 1H  
CTEMP 22.6 c  
SLVNT DMSO  
EXREF 39.50 ppm  
BF 1.20 Hz  
RGAIN 60

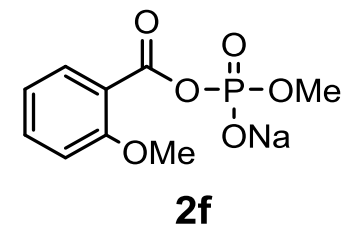

single\_pulse

G:\imani\MI-O-F\_Proton-1-1.als

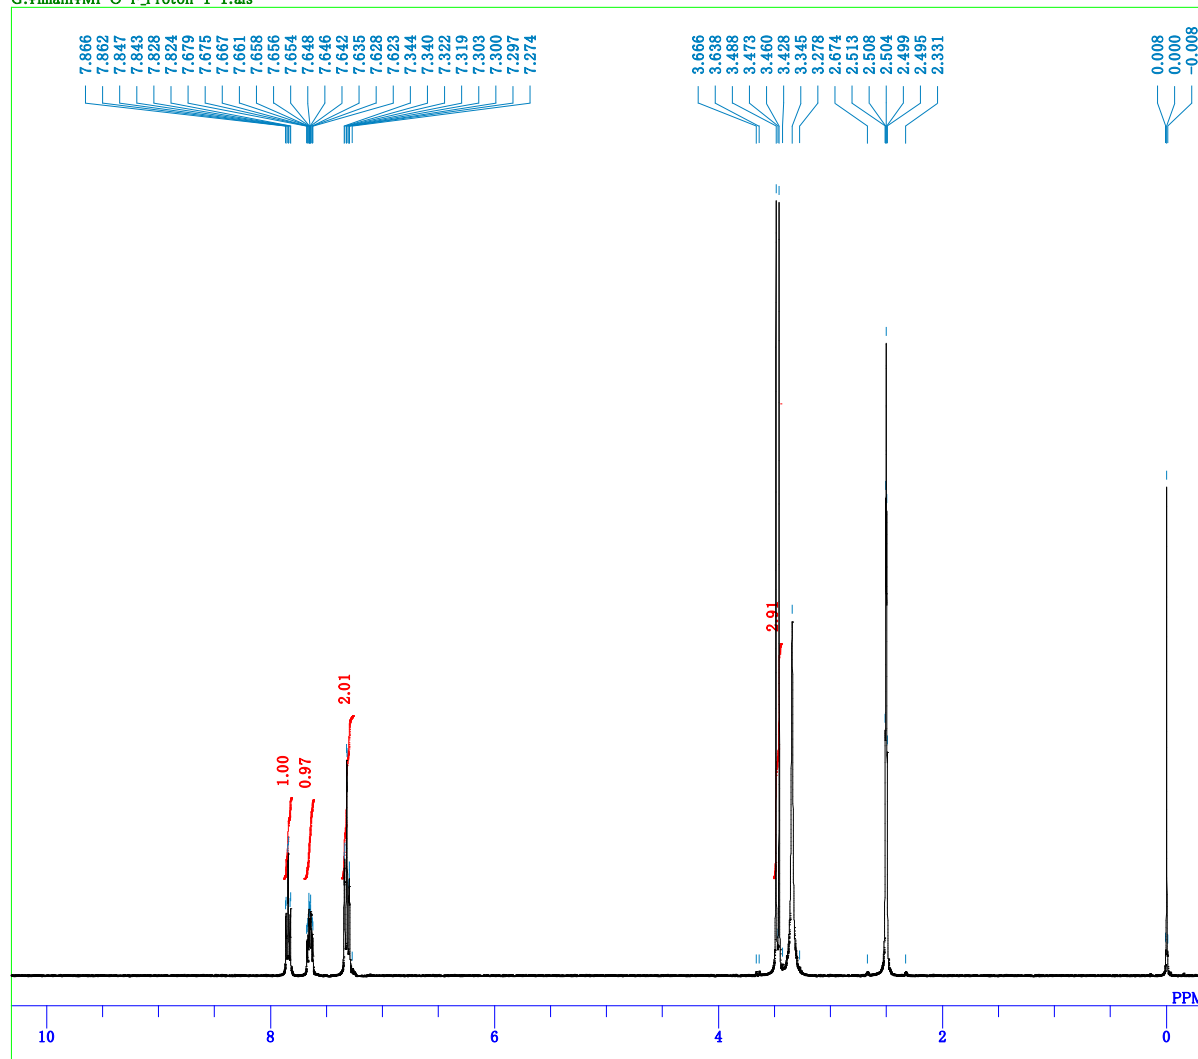

DFILE MI-O-F\_Proton-1-1.als  
COMNT single\_pulse  
DATIM 27-06-2013 14:01:21  
OBNUC 1H  
EXMOD proton.jxp  
OBFRQ 399.78 MHz  
OBSET 4.19 KHz  
OBFIN 7.29 Hz  
POINT 52428  
FREQU 6002.40 Hz  
SCANS 8  
ACQTM 8.7346 sec  
PD 5.0000 sec  
PW1 4.91 usec  
IRNUC 1H  
CTEMP 20.6 c  
SLVNT DMSO  
EXREF 0.00 ppm  
BF 0.12 Hz  
RGAIN 48

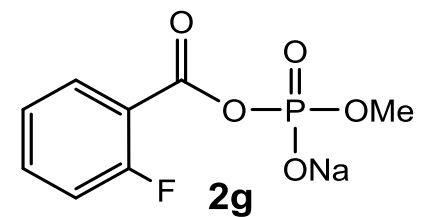

single pulse decoupled gated NOE

H:\Yimani\Fo-F新しいやつ\_Carbon-1-1.als

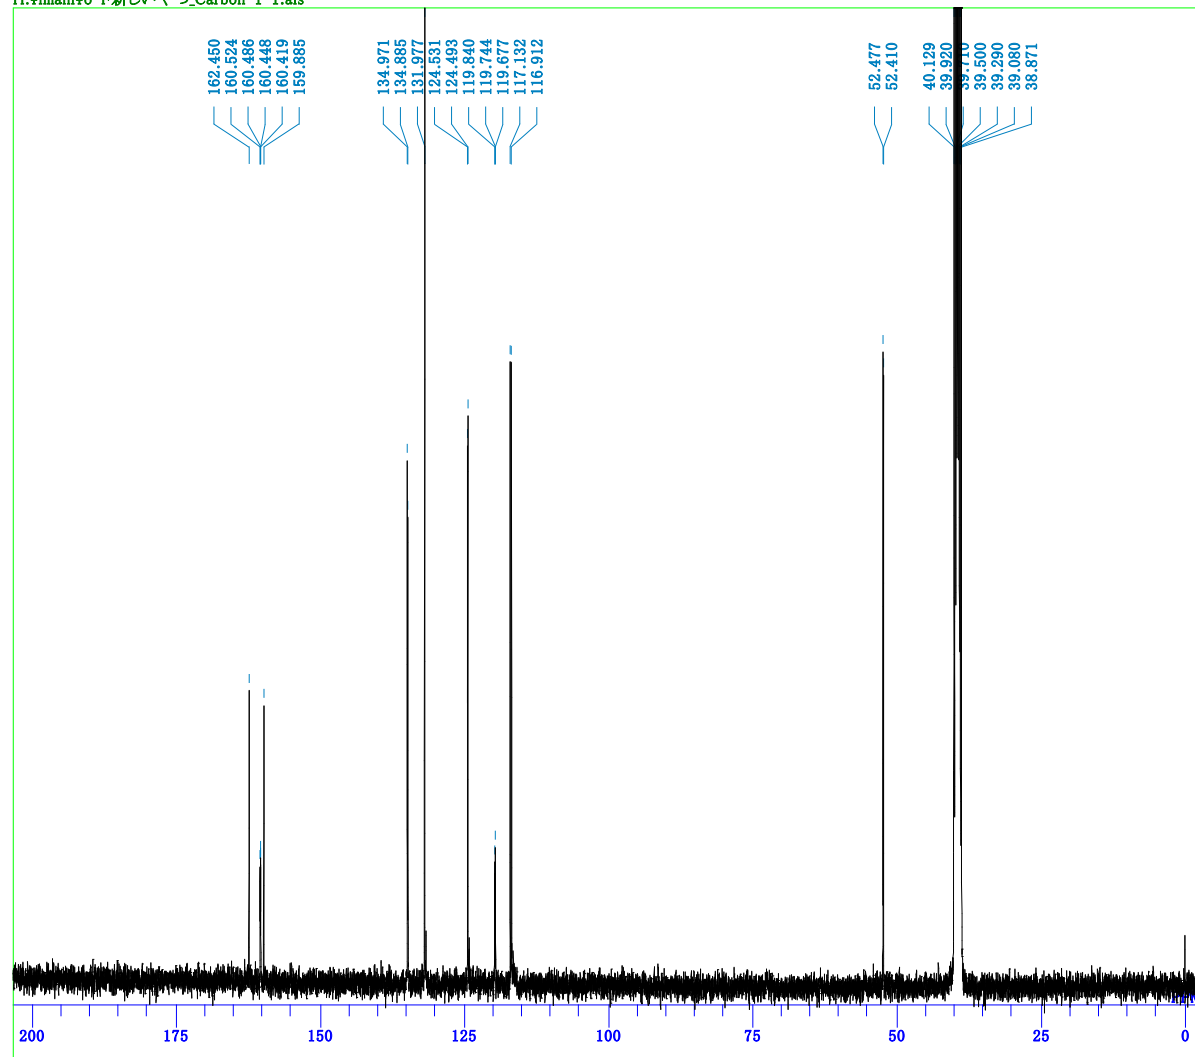

DFILE o-F新しいやつ\_Carbon-1-1.als  
COMNT single pulse decoupled gated NOE  
DATIM 15-08-2013 00:45:30  
OBNUC 13C  
EXMOD carbon\_jxp  
OBFRQ 100.53 MHz  
OBSET 5.35 KHz  
OBFIN 5.86 Hz  
POINT 26214  
FREQU 25125.63 Hz  
SCANS 5000  
ACQTM 1.0433 sec  
PD 2.0000 sec  
PW1 2.67 usec  
IRNUC 1H  
CTEMP 21.7 c  
SLVNT DMSO  
EXREF 39.50 ppm  
BF 1.20 Hz  
RGAIN 60

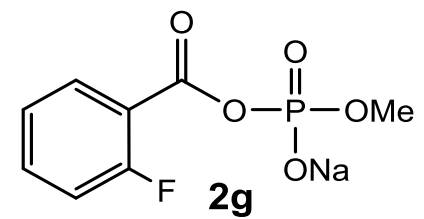

single\_pulse

G:\Yimani\MI-O-ClProton-1-1.als

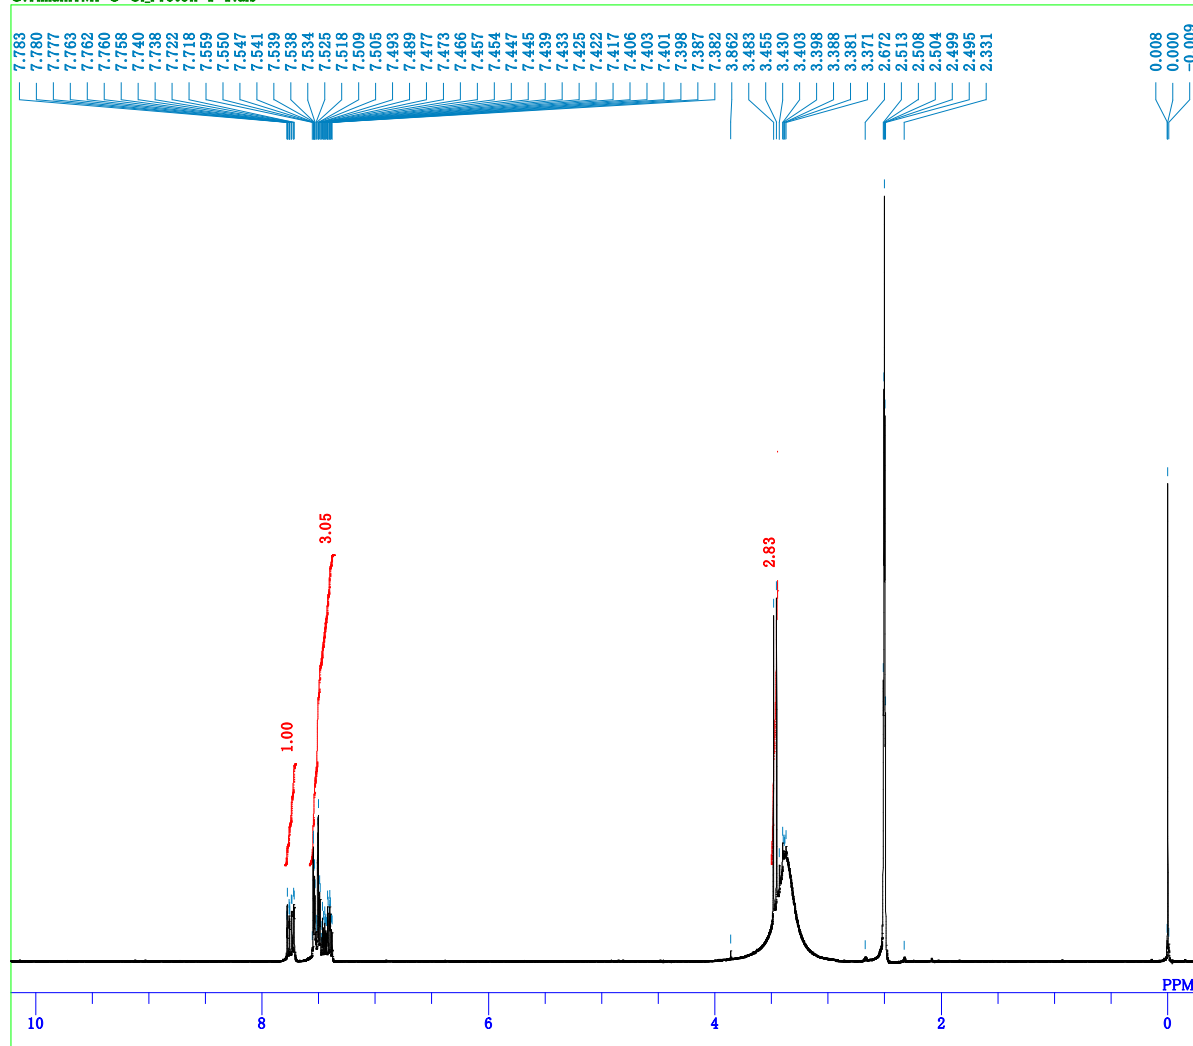

D:\MI-O-ClProton-1-1.als  
single\_pulse  
27-06-2013 14:12:05  
1H  
proton.jxp  
EXMOD 399.78 MHz  
OBFRQ 4.19 KHz  
OBSET 7.29 Hz  
POINT 52428  
FREQU 6002.40 Hz  
SCANS 8  
ACQTM 8.7346 sec  
PD 5.0000 sec  
PW1 4.91 usec  
IRNUC 1H  
CTEMP 20.5 c  
SLVNT DMSO  
EXREF 0.00 ppm  
BF 0.12 Hz  
RGAIN 46

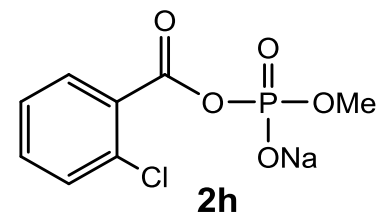

single pulse decoupled gated NOE

H<sup>1</sup> 今仁麻黄 NMR結果順MI-o-Cl\_Carbon-1-1.als

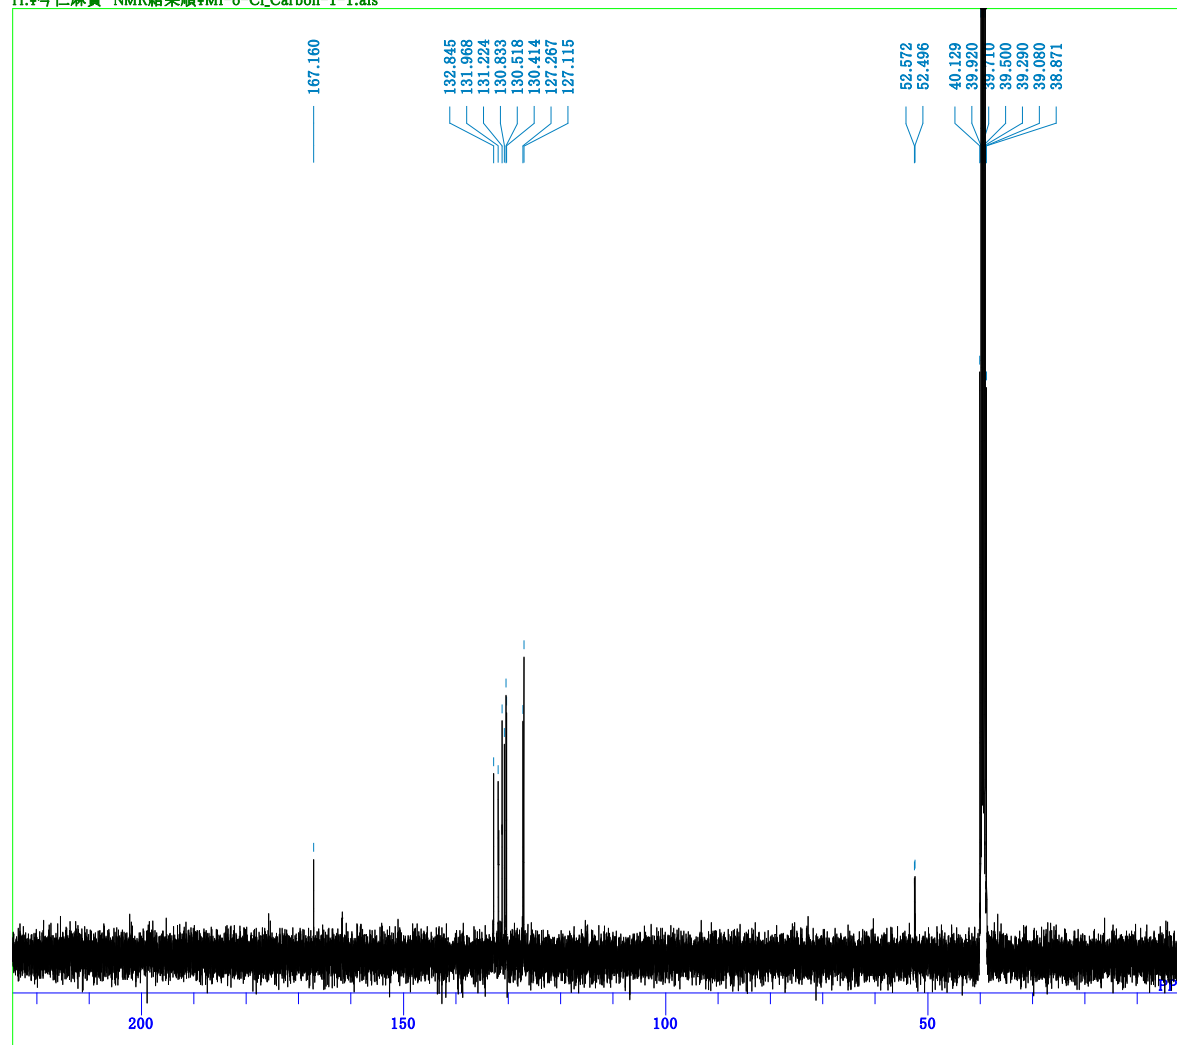

DFILE MI-o-Cl\_Carbon-1-1.als  
COMNT single pulse decoupled gated NOE  
DATIM 26-06-2013 20:53:12  
OBNUC 13C  
EXMOD carbon.jpg  
OBFRQ 100.53 MHz  
OBSET 5.35 KHz  
OBFIN 5.86 Hz  
POINT 26214  
FREQU 25125.63 Hz  
SCANS 1024  
ACQTM 1.0433 sec  
PD 2.0000 sec  
PW1 2.67 usec  
IRNUC 1H  
CTEMP 21.7 c  
SLVNT DMSO  
EXREF 39.50 ppm  
BF 0.12 Hz  
RGAIN 60

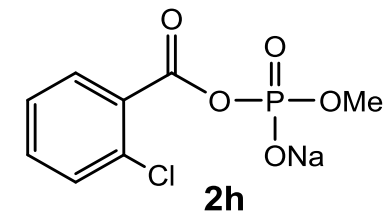

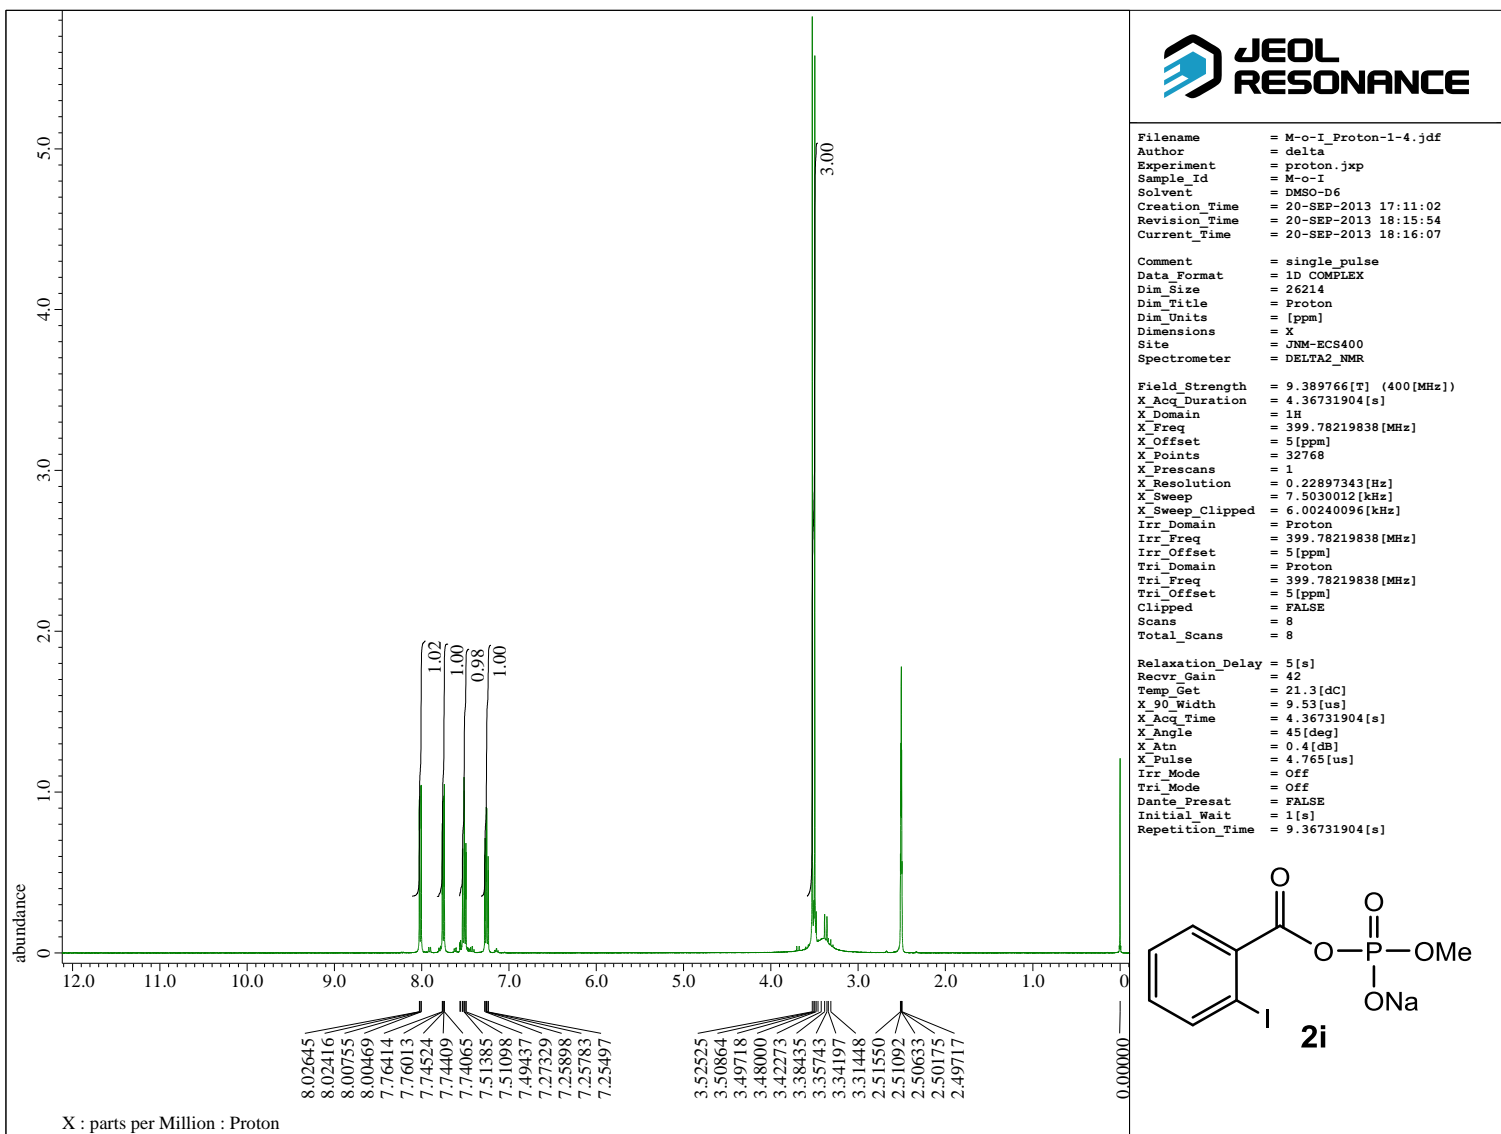

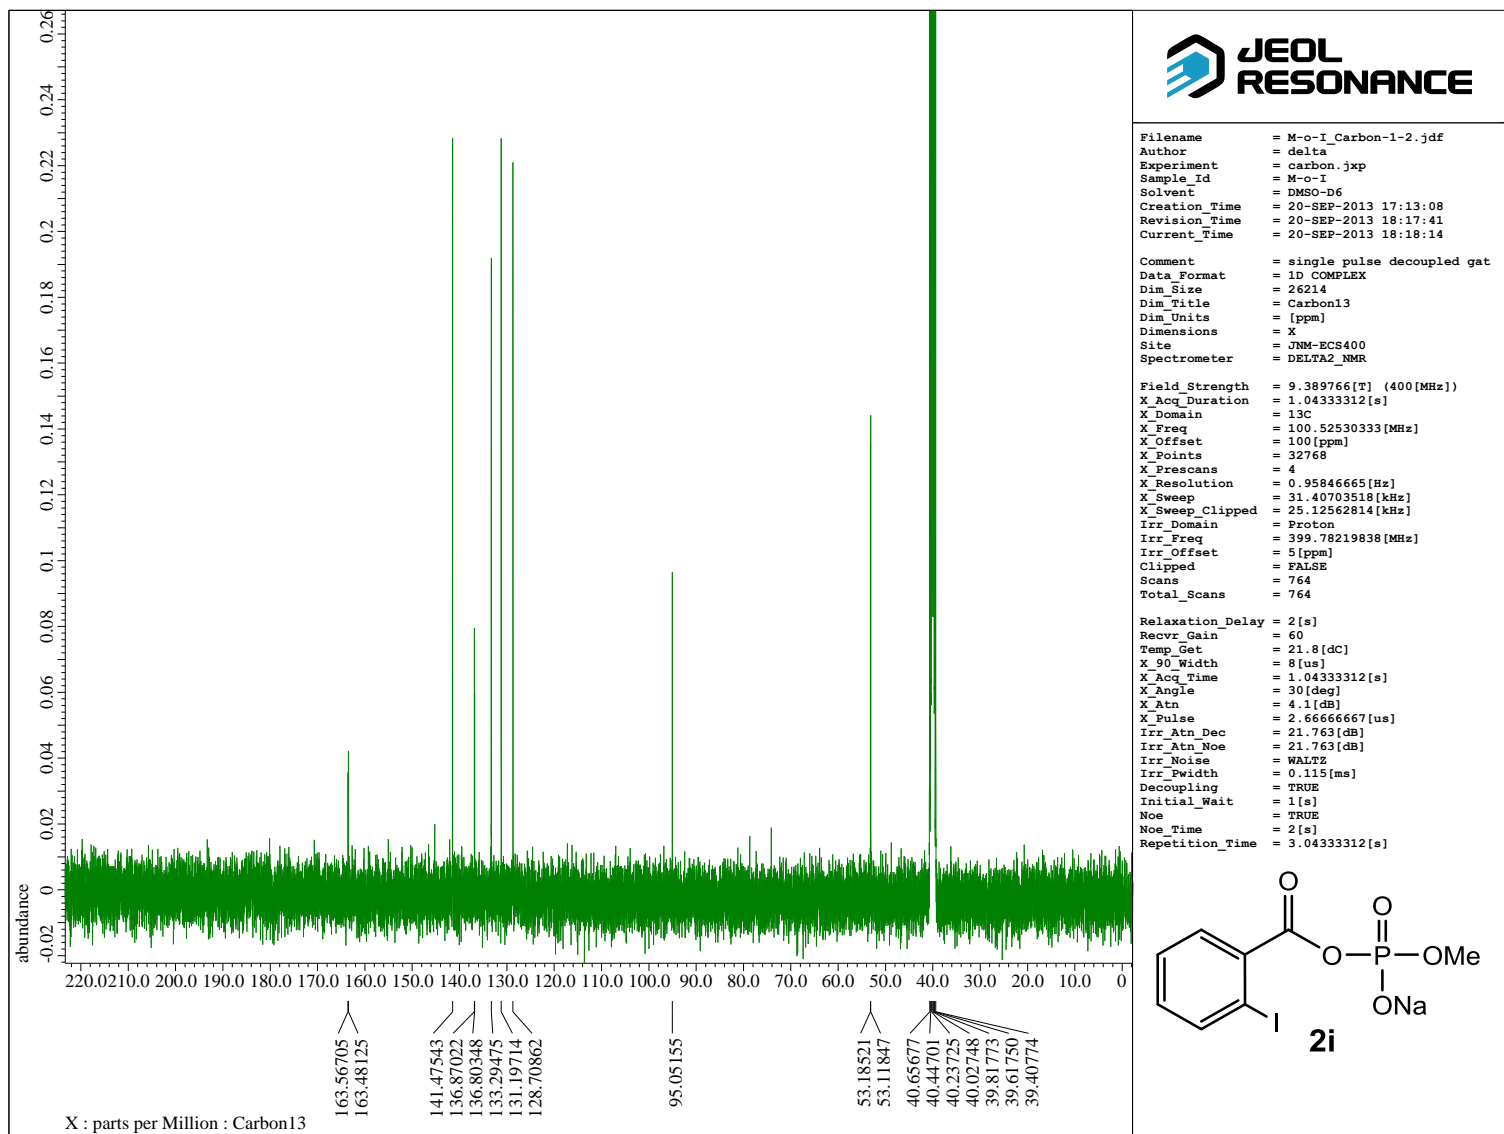

single\_pulse

G:\imani\MI11\_Proton-1-1解析.als

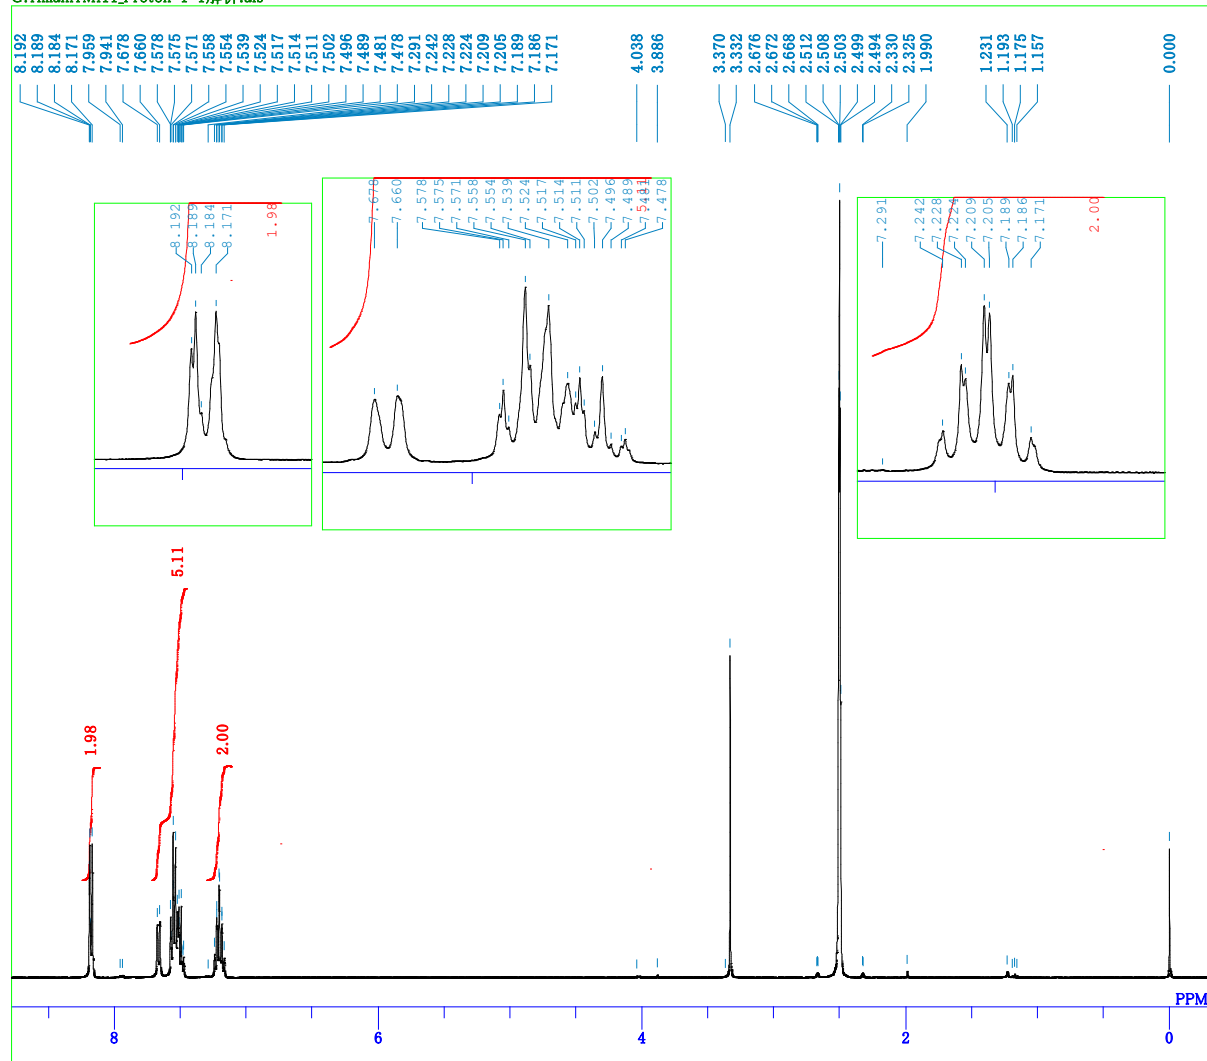

DFILE MI11\_Proton-1-1解析.als  
COMNT single\_pulse  
DATIM 11-01-2013 16:54:39  
OBNUC 1H  
EXMOD proton\_jxp  
OBFREQ 399.78 MHz  
OBSET 4.19 KHz  
OBFIN 7.29 Hz  
POINT 52428  
FREQU 6002.40 Hz  
SCANS 8  
ACQTM 8.7346 sec  
PD 5.0000 sec  
PW1 4.91 usec  
IRNUC 1H  
CTEMP 22.6 c  
SLVNT DMSO  
EXREF 0.00 ppm  
BF 0.12 Hz  
RGAIN 44

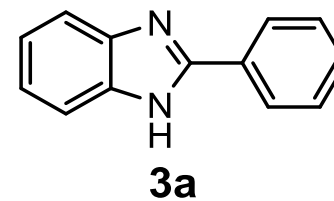



HH3-84-1C

H:\imani\HH3-84-1C.als

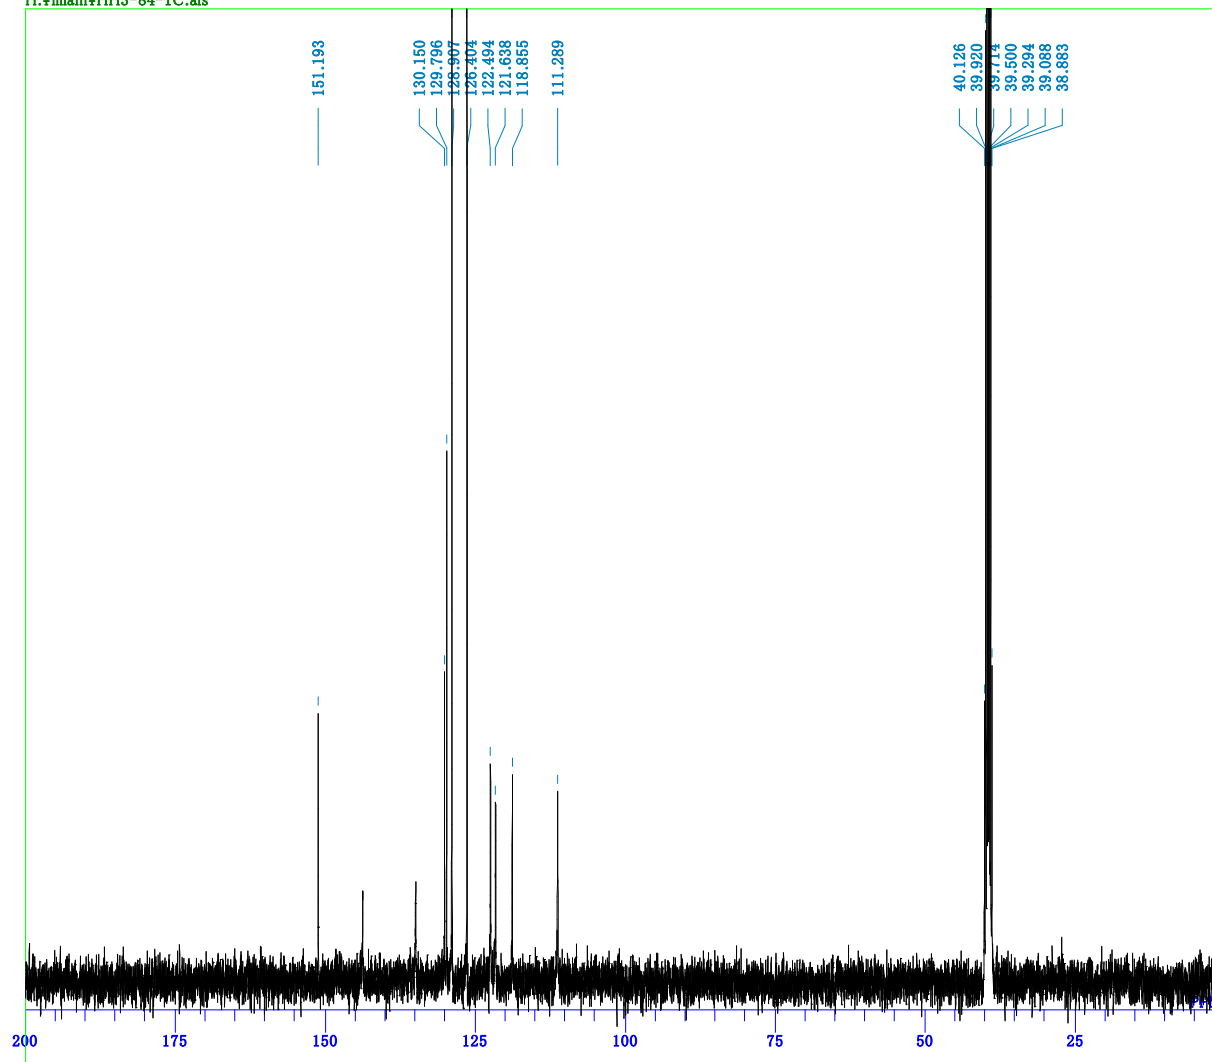

DFILE HH3-84-1C.als  
COMNT HH3-84-1C  
DATIM Fri Mar 02 09:53:29 2012  
OBNUC 13C  
EXMOD BCM  
OBFRQ 100.40 MHz  
OBSET 125.00 KHz  
OBFIN 10500.00 Hz  
POINT 32768  
FREQU 27118.64 Hz  
SCANS 139  
ACQTM 1.2083 sec  
PD 1.7920 sec  
PW1 4.70 usec  
IRNUC 1H  
CTEMP 25.1 c  
SLVNT DMSO  
EXREF 39.50 ppm  
BF 1.20 Hz  
RGAIN 24

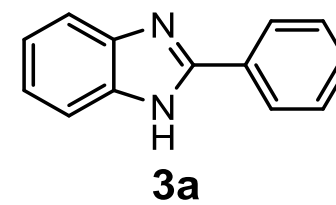

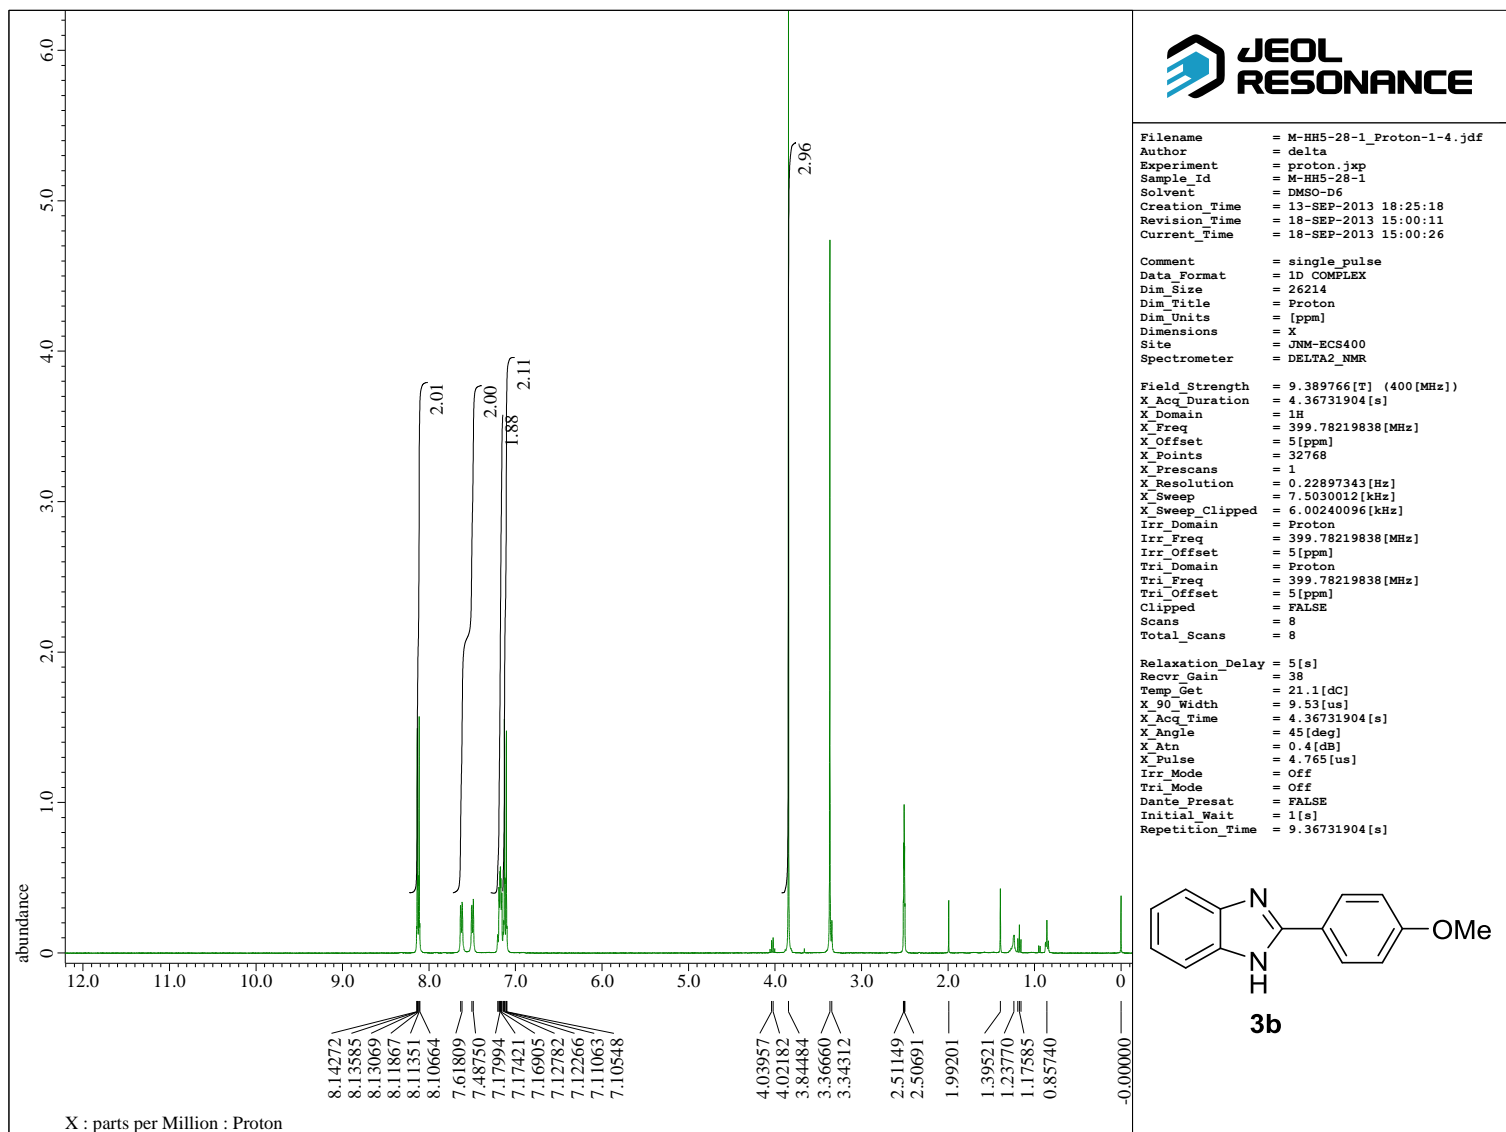

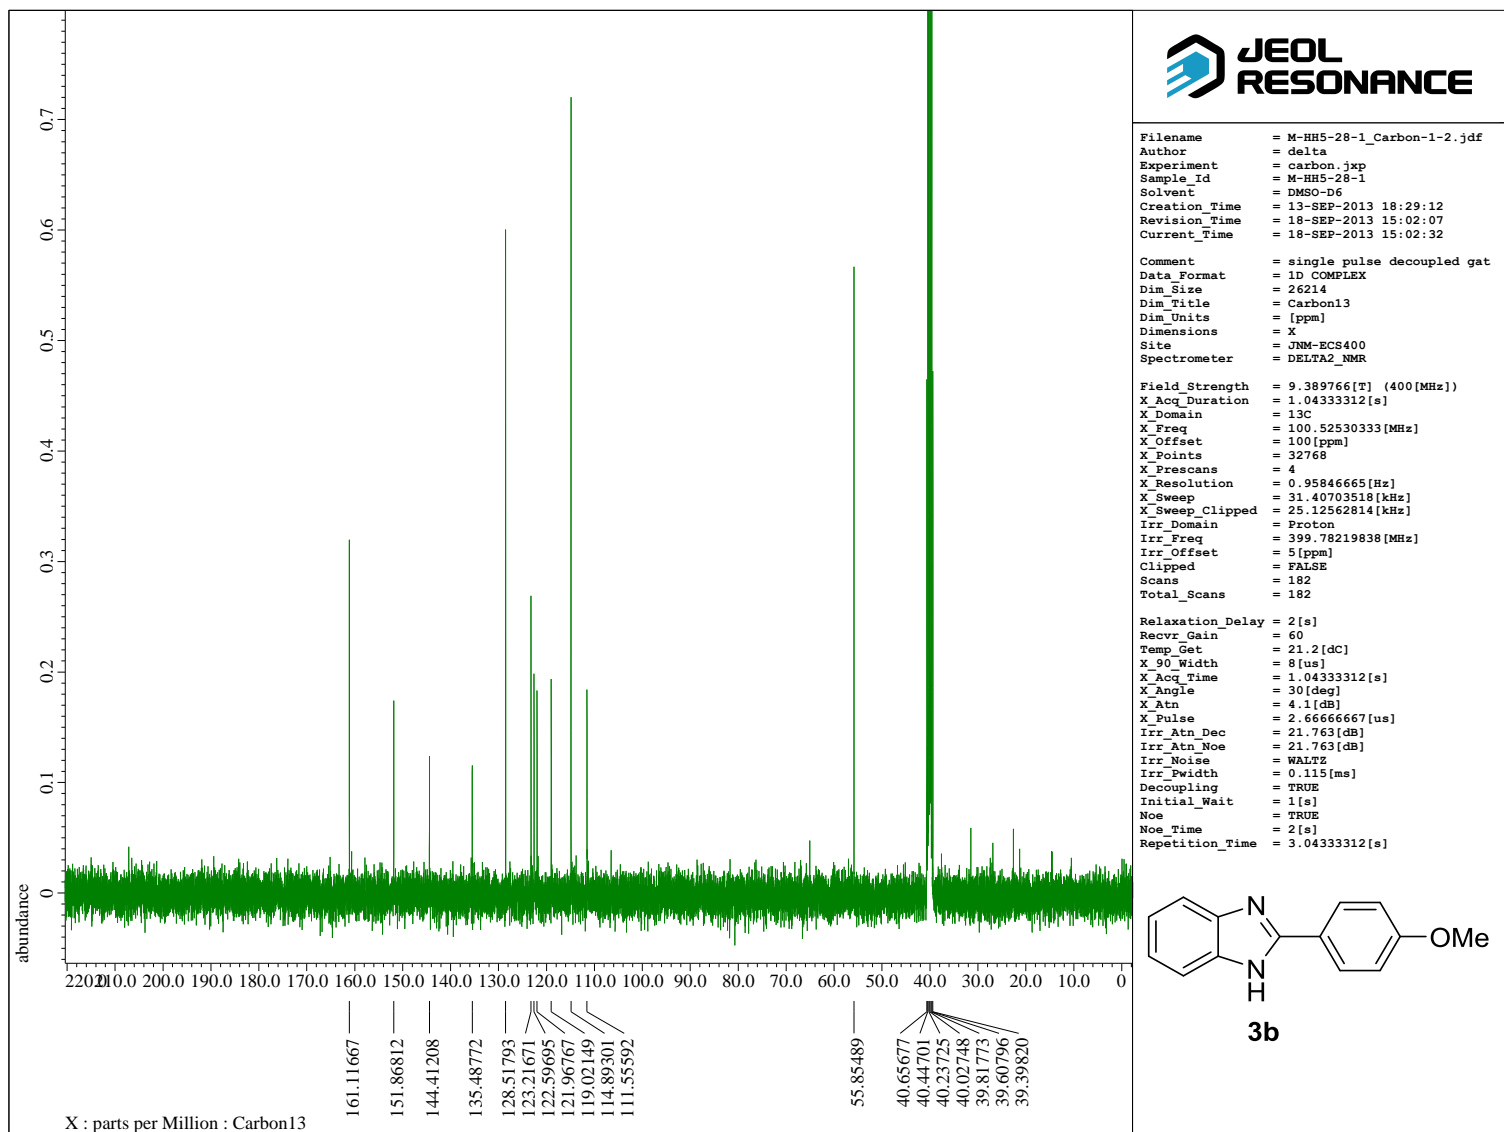

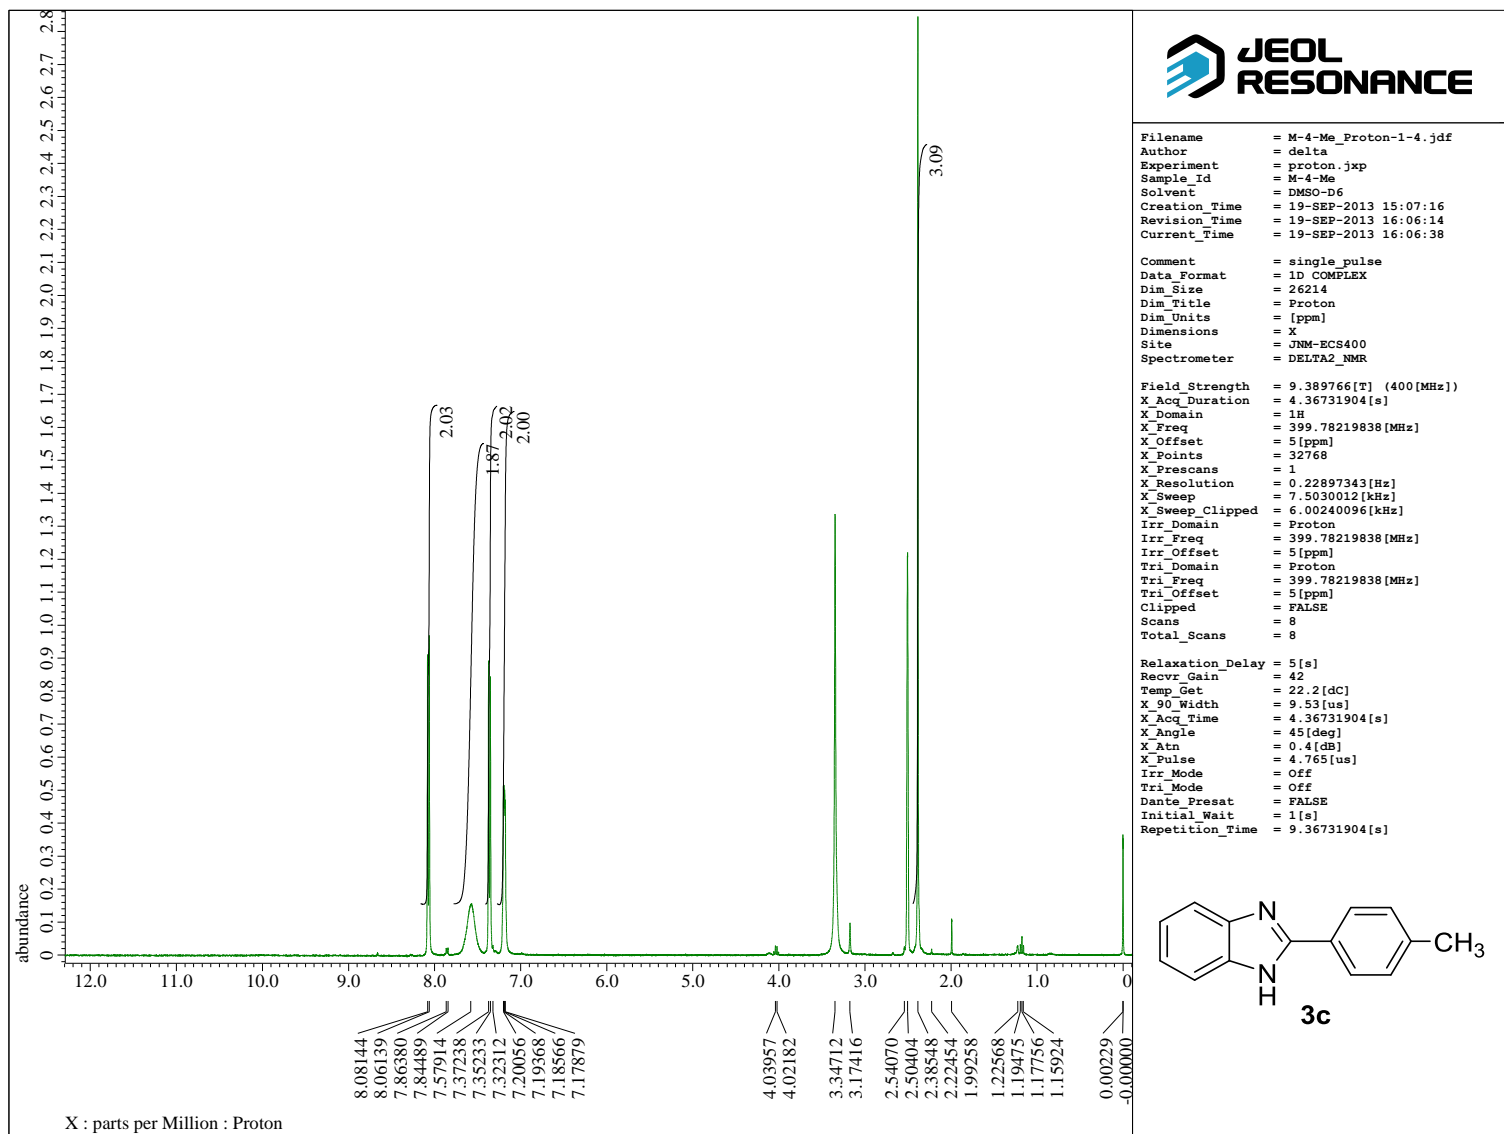

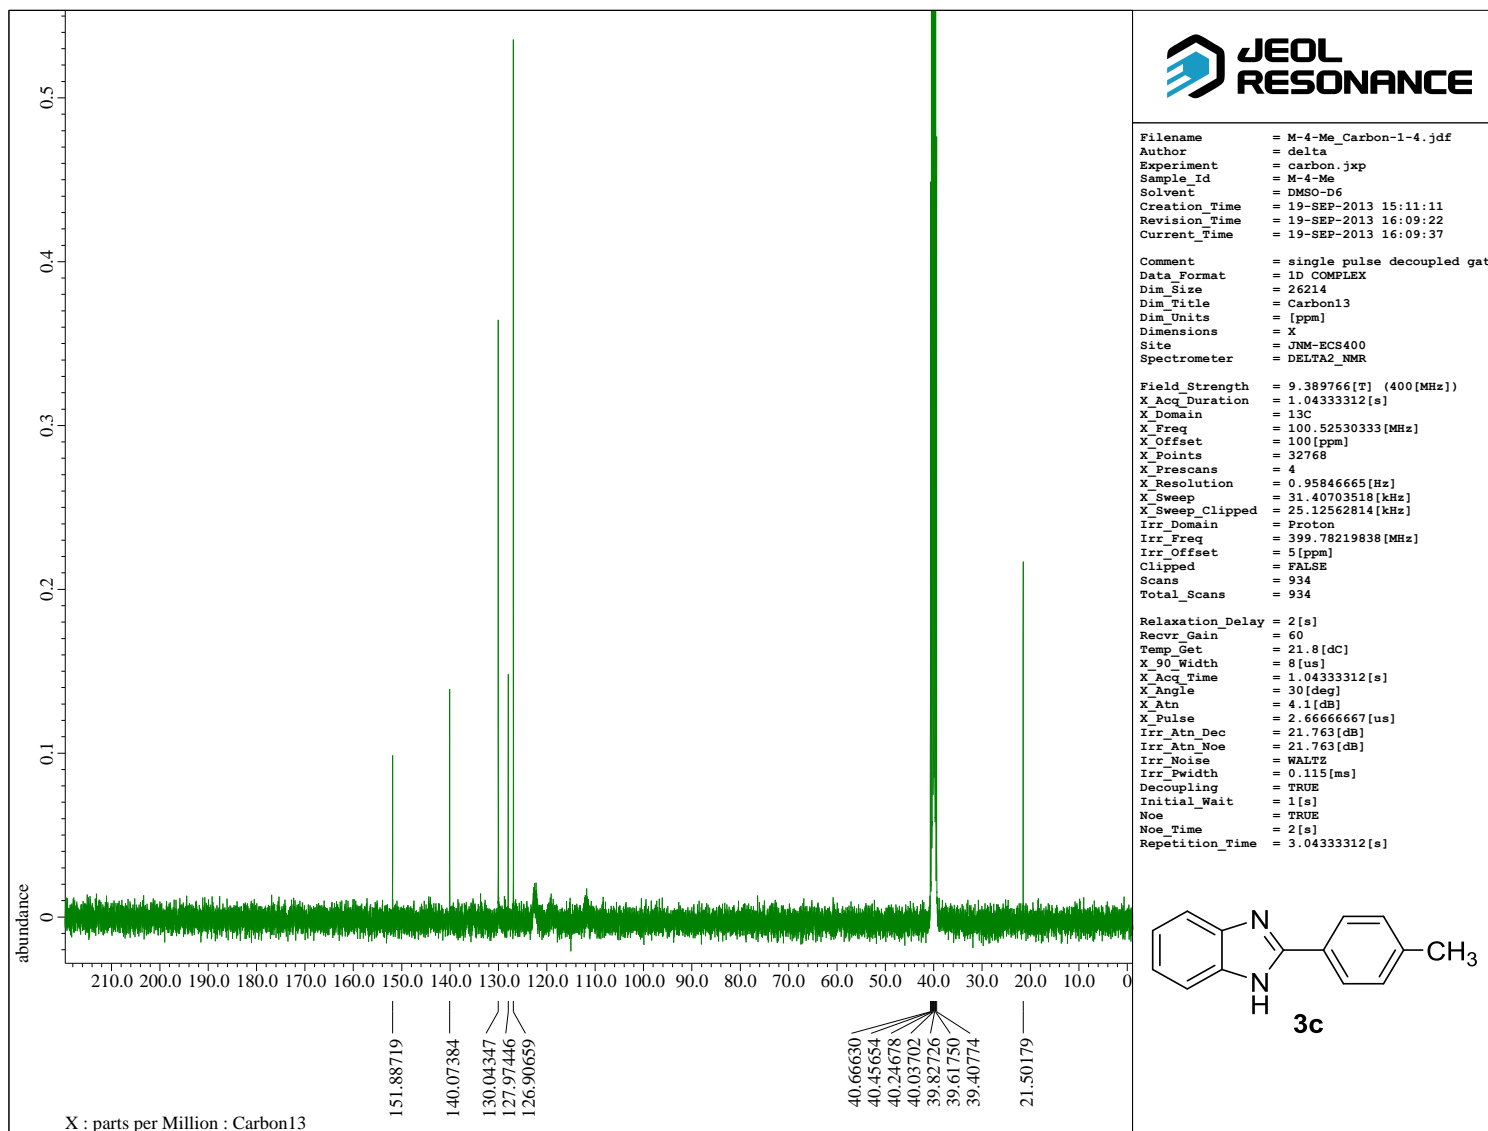

single\_pulse

G:\imani\MI16\_Proton-1-1解析.als

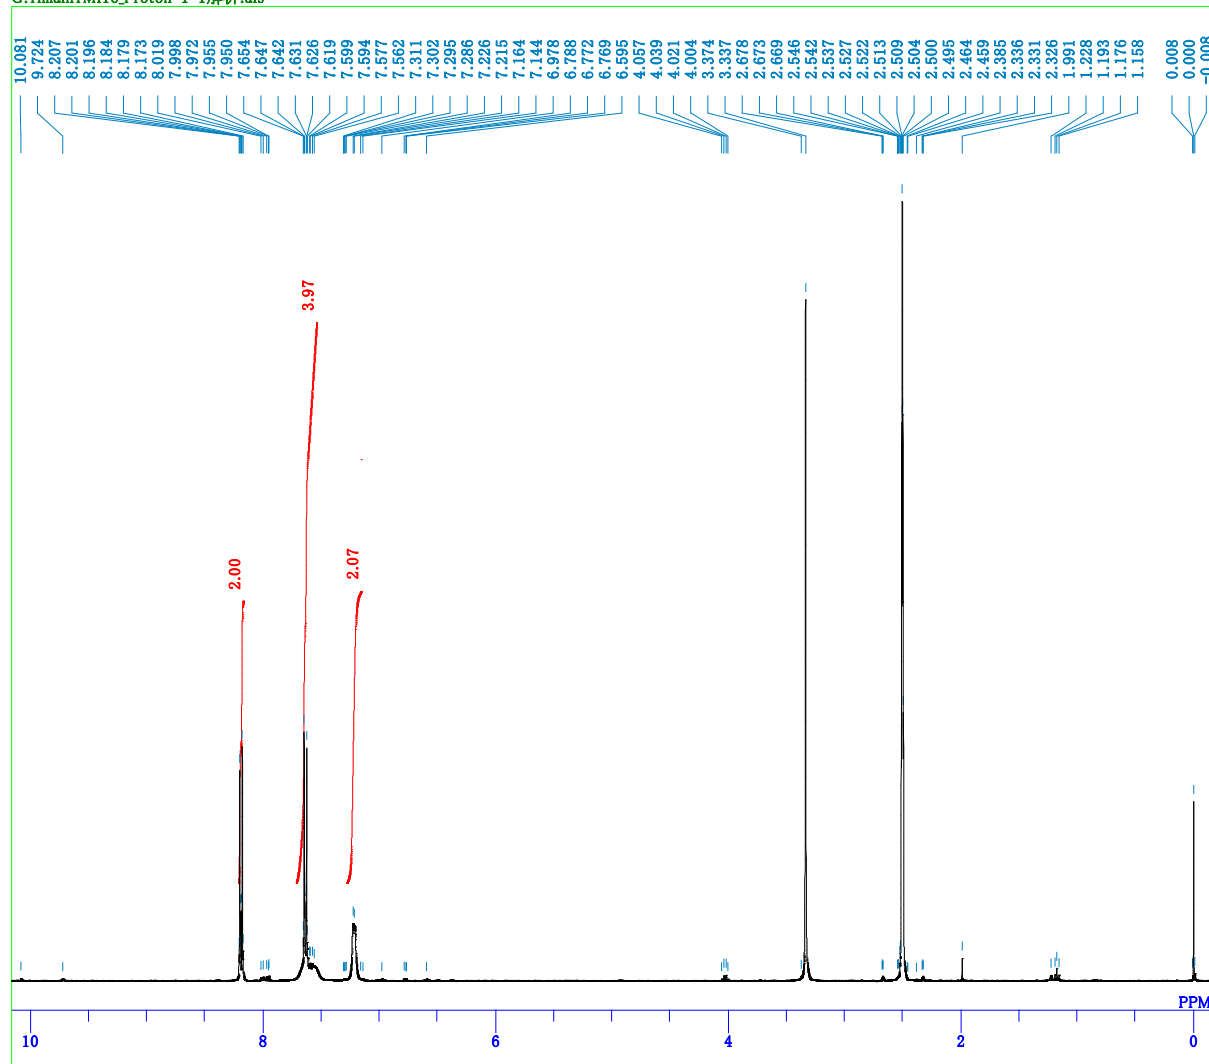

DFILE MI16\_Proton-1-1解析.als  
COMNT single\_pulse  
DATIM 05-02-2013 13:16:55  
OBNUC 1H  
EXMOD proton.jxp  
OBFRQ 399.78 MHz  
OBSET 4.19 KHz  
OBFIN 7.29 Hz  
POINT 52428  
FREQU 6002.40 Hz  
SCANS 8  
ACQTM 8.7346 sec  
PD 5.0000 sec  
PW1 4.91 usec  
IRNUC 1H  
CTEMP 22.9 c  
SLVNT DMSO  
EXREF 0.00 ppm  
BF 0.12 Hz  
RGAIN 44

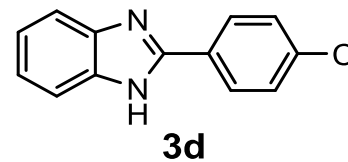

single pulse decoupled gated NOE

G:\fimani\MI16-2\_Carbon-1-1.als

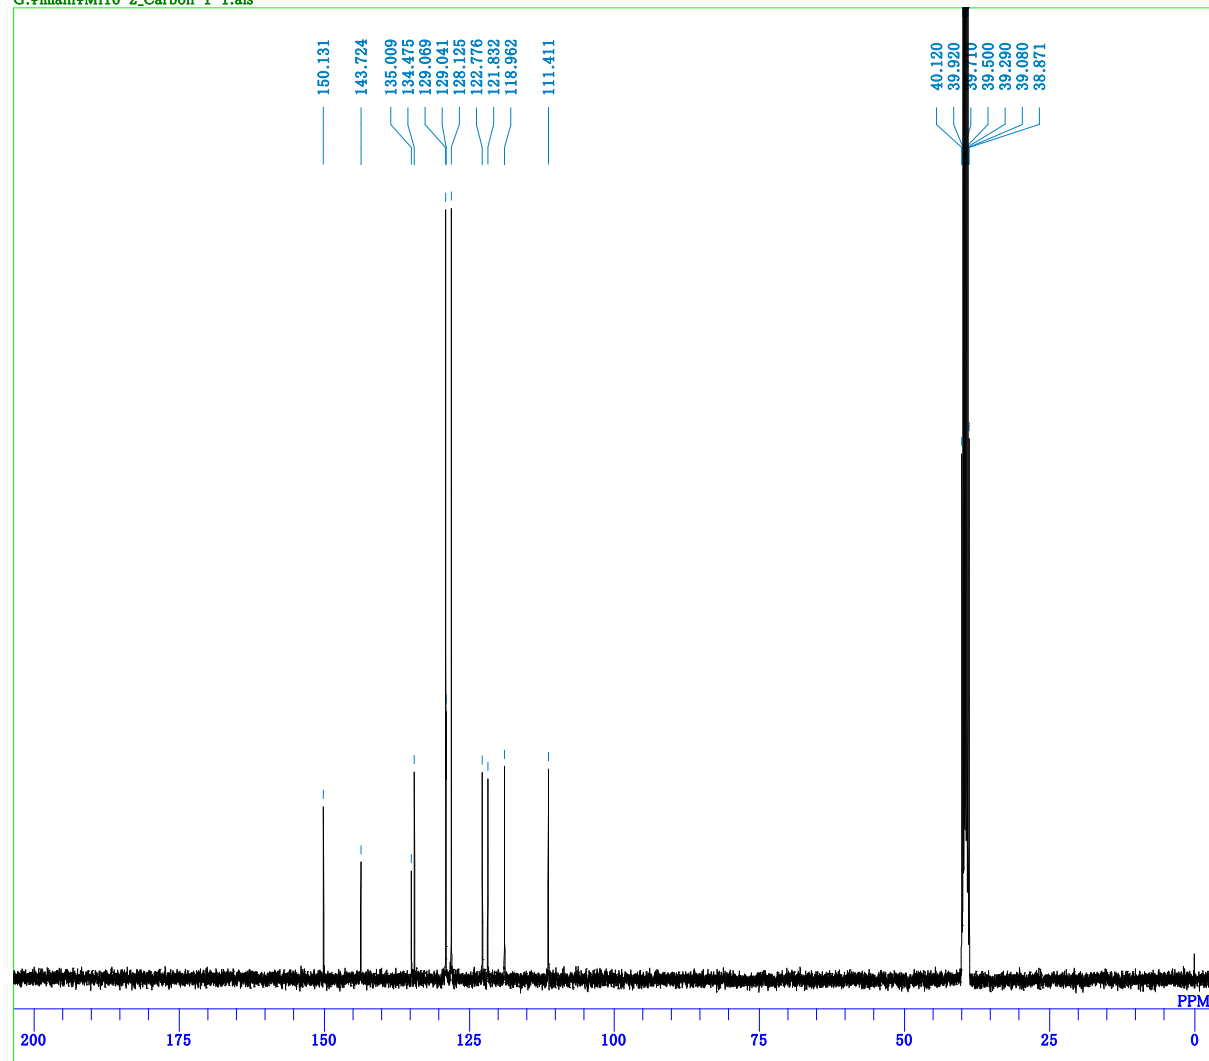

DFILE MI16-2\_Carbon-1-1.als  
COMNT single pulse decoupled gated NOE  
DATIM 03-07-2013 18:53:40  
OBNUC 13C  
EXMOD carbon\_jrp  
OBFRQ 100.53 MHz  
OBSET 5.35 KHz  
OBFIN 5.86 Hz  
POINT 26214  
FREQU 25125.63 Hz  
SCANS 1024  
ACQTM 1.0433 sec  
PD 2.0000 sec  
PW1 2.67 usec  
IRNUC 1H  
CTEMP 21.1 c  
SLVNT DMSO  
EXREF 39.50 ppm  
BF 1.20 Hz  
RGAIN 60

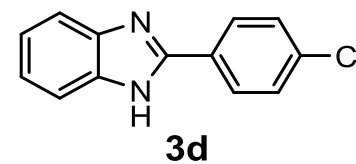

single\_pulse

G:\imani\MI21-fr1-11\_Proton-1-1.als

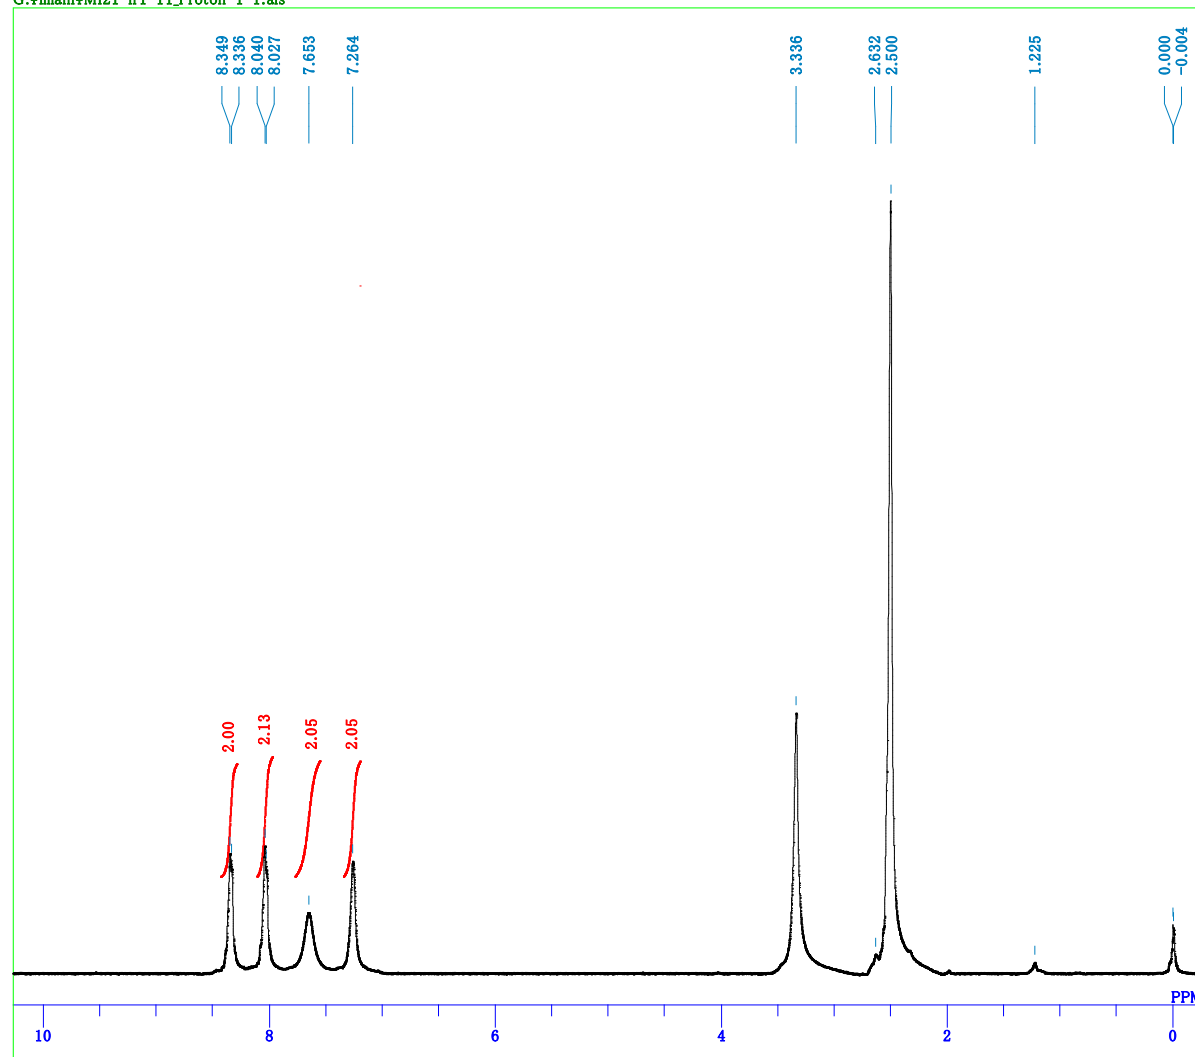

DFILE MI21-fr1-11\_Proton-1-1.als  
COMNT single\_pulse  
DATIM 26-02-2013 13:05:35  
OBNUC 1H  
EXMOD proton.jxp  
OBFRQ 399.78 MHz  
OBSET 4.19 KHz  
OBFIN 7.29 Hz  
POINT 52428  
FREQU 6002.40 Hz  
SCANS 8  
ACQTM 8.7346 sec  
PD 5.0000 sec  
PW1 4.91 usec  
IRNUC 1H  
CTEMP 21.8 c  
SLVNT DMSO  
EXREF 0.00 ppm  
BF 0.12 Hz  
RGAIN 44

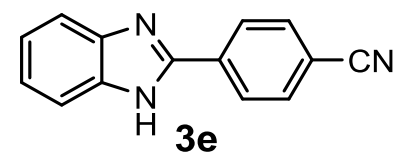



single pulse decoupled gated NOE

G:\imani\MI21-2\_Carbon-1-1.als

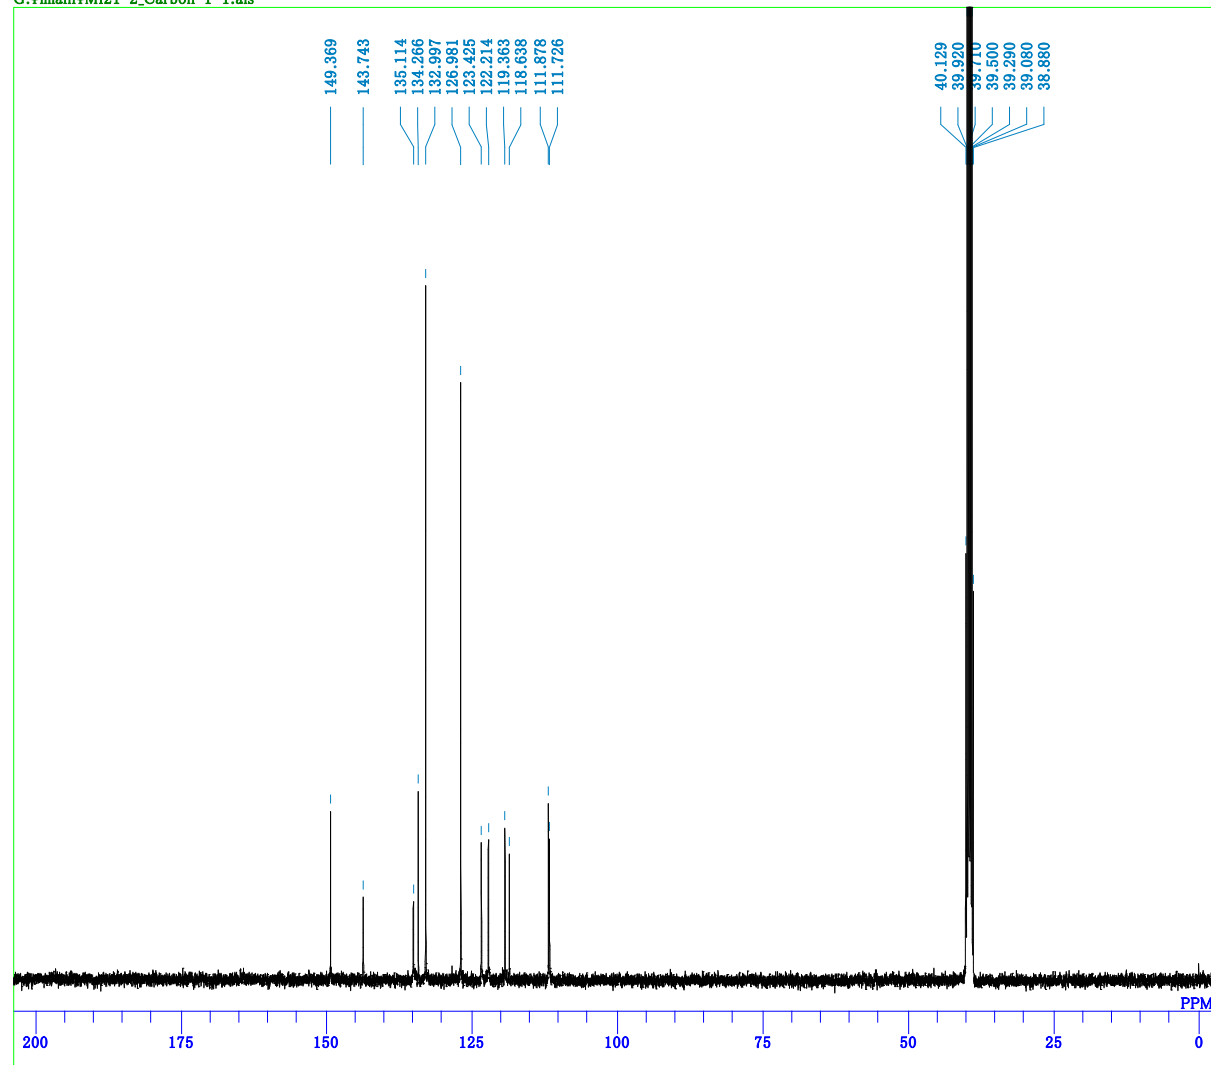

DFILE MI21-2\_Carbon-1-1.als  
COMNT single pulse decoupled gated NOE  
DATIM 03-07-2013 19:55:09  
OBNUC 13C  
EXMOD carbon.jxp  
OBFRQ 100.53 MHz  
OBSET 5.35 KHz  
OBFIN 5.86 Hz  
POINT 26214  
FREQU 25125.63 Hz  
SCANS 1024  
ACQTM 1.0433 sec  
PD 2.0000 sec  
PW1 2.67 usec  
IRNUC 1H  
CTEMP 21.3 c  
SLVNT DMSO  
EXREF 39.50 ppm  
BF 1.20 Hz  
RGAIN 60

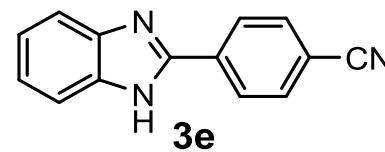

single\_pulse

G:\Yimani\MI6\_Proton-1-1解析.als

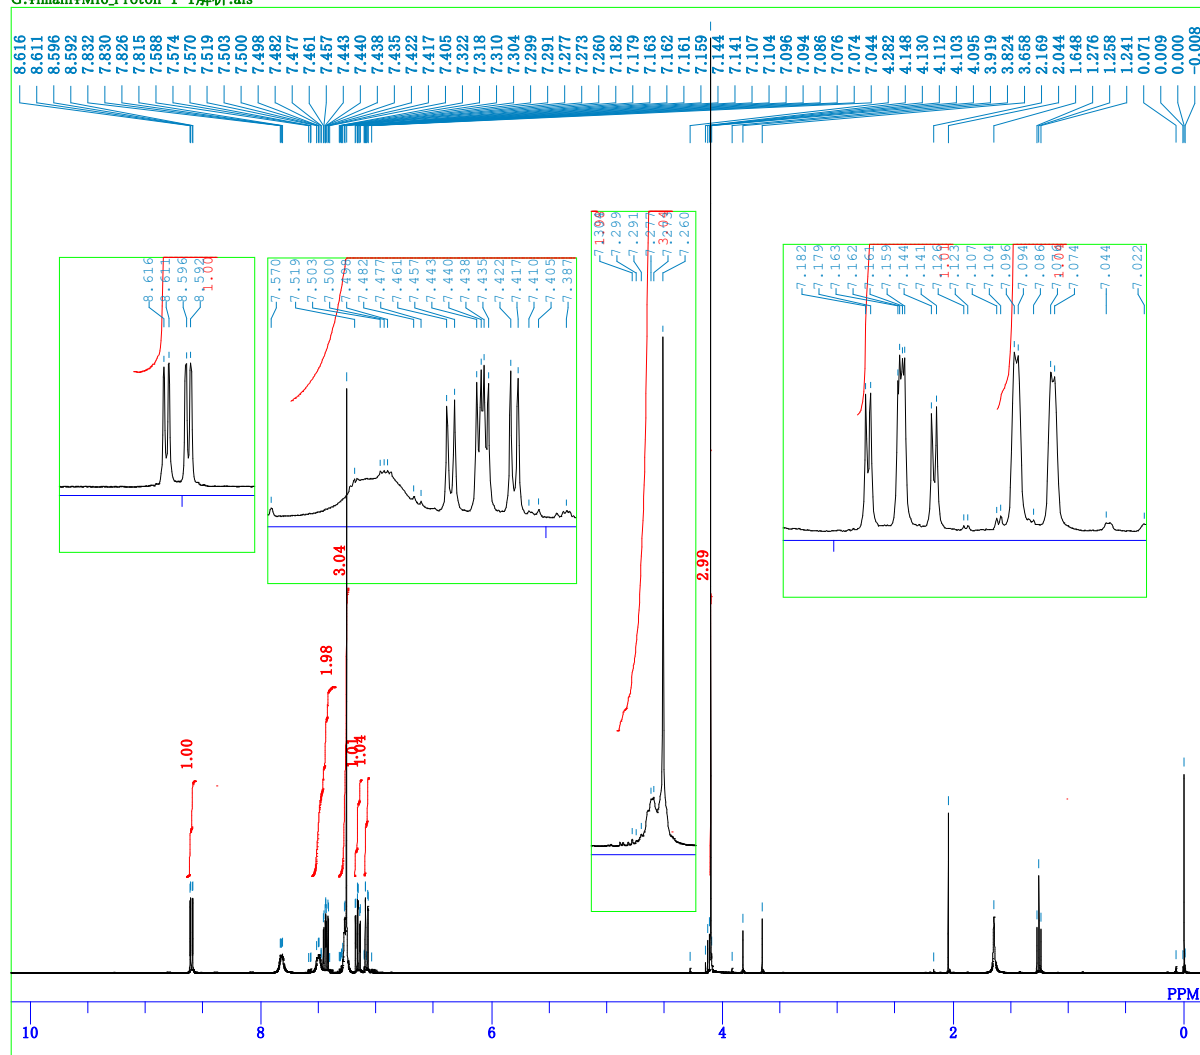

DFILE  
COMNT  
DATIM  
OBNUC  
EXMOD  
OBFREQ  
OBSSET  
OBFIN  
POINT  
FREQU  
SCANS  
ACQTM  
PD  
PW1  
IRNUC  
CTEMP  
SLVNT  
EXREF  
BF  
RGAIN

MI6\_Proton-1-1解析.als  
single\_pulse  
13-12-2012 17:15:01  
1H  
proton.jxp  
399.78 MHz  
4.19 KHz  
7.29 Hz  
26214  
6002.40 Hz  
8  
4.3673 sec  
5.0000 sec  
4.91 usec  
1H  
23.6 c  
CDCl3  
0.00 ppm  
0.12 Hz  
48

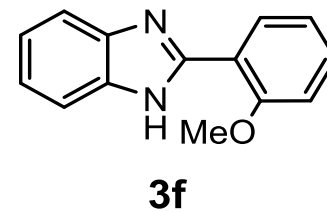

single pulse decoupled gated NOE

G:\fmani\MI6-2\_Carbon-1-1.als

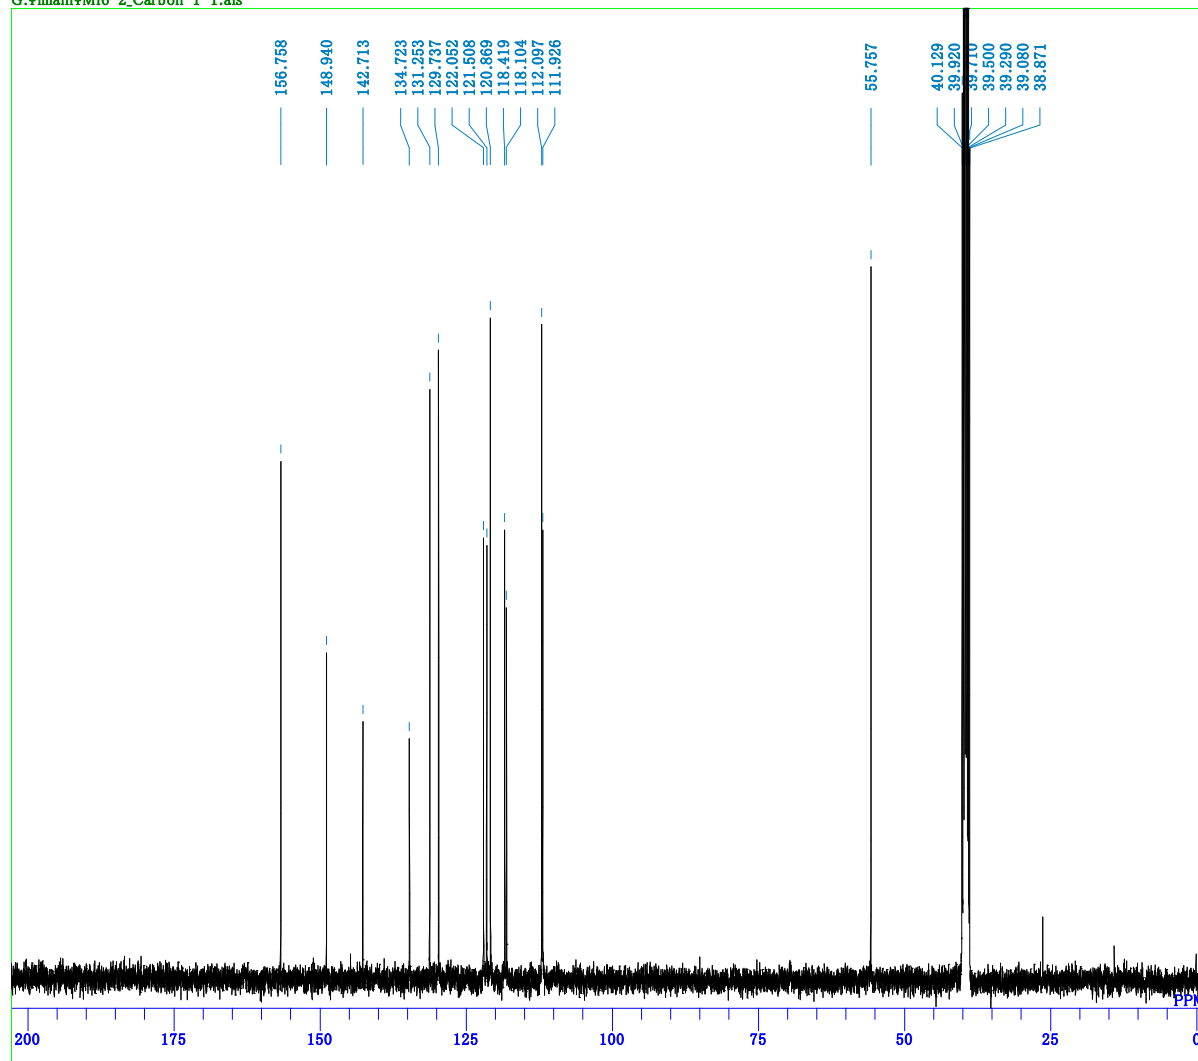

DFILE MI6-2\_Carbon-1-1.als  
COMNT single pulse decoupled gated NOE  
DATIM 03-07-2013 17:54:41  
OBNUC 13C  
EXMOD carbon.jxp  
OBFRQ 100.53 MHz  
OBSET 5.35 KHz  
OBFIN 5.86 Hz  
POINT 26214  
FREQU 25125.63 Hz  
SCANS 1024  
ACQTM 1.0433 sec  
PD 2.0000 sec  
PW1 2.67 usec  
IRNUC 1H  
CTEMP 21.2 c  
SLVNT DMSO  
EXREF 39.50 ppm  
BF 1.20 Hz  
RGAIN 60

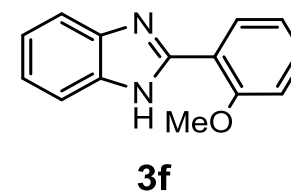

single\_pulse

G:\imani\MI24\_Proton-1-1.als

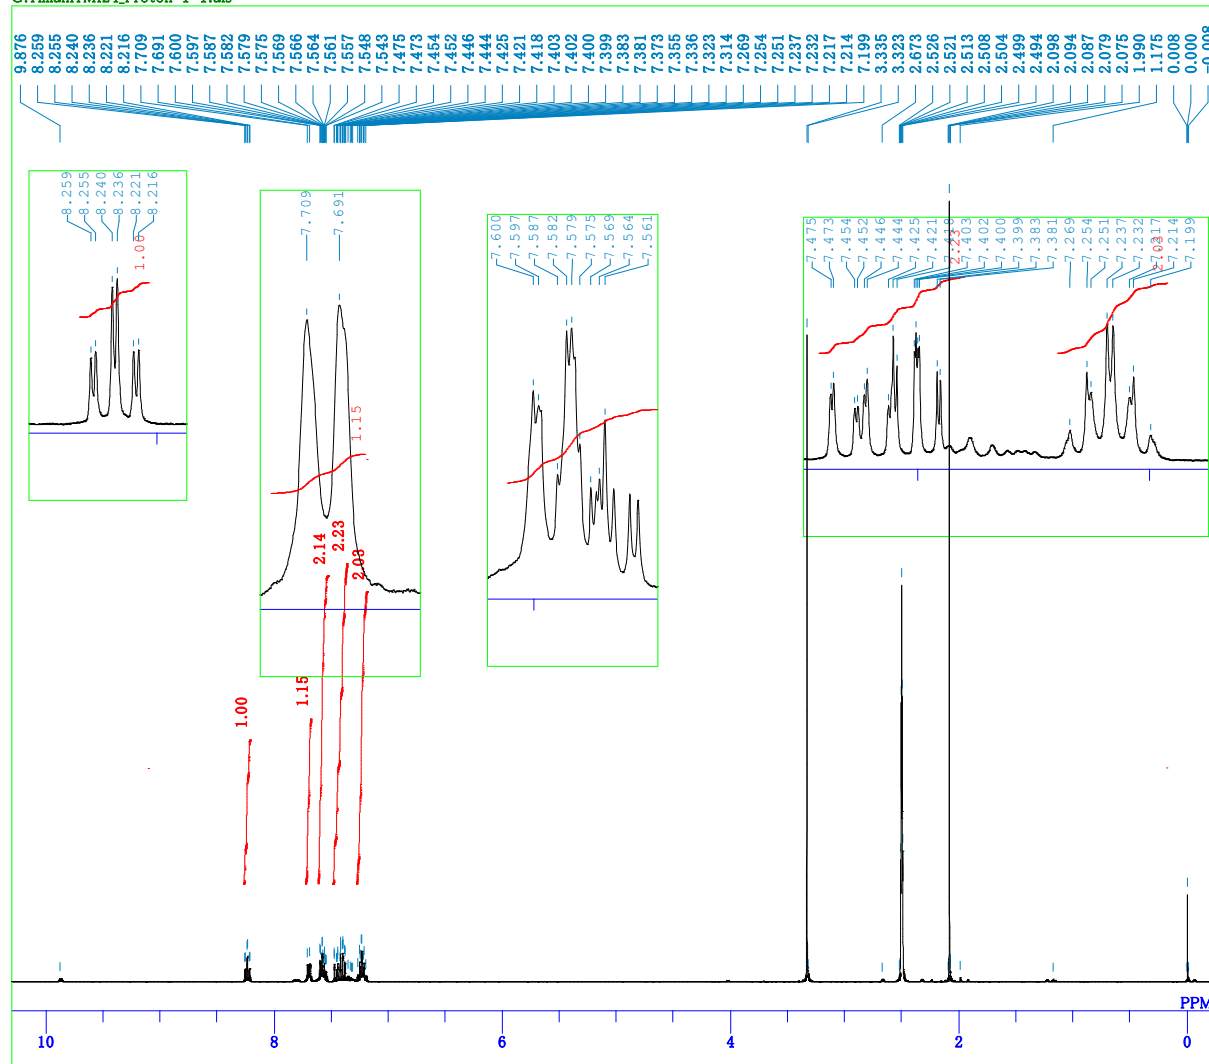

DFILE MI24\_Proton-1-1.als  
 COMNT single\_pulse  
 DATIM 07-03-2013 13:24:51  
 OBNUC 1H  
 EXMOD proton.jxp  
 OBFREQ 399.78 MHz  
 OBSETE 4.19 KHz  
 OBFIN 7.29 Hz  
 POINT 52428  
 FREQU 6002.40 Hz  
 SCANS 8  
 ACQTM 8.7346 sec  
 PD 5.0000 sec  
 PW1 4.91 usec  
 IRNUC 1H  
 CTEMP 21.6 c  
 SLVNT DMSO  
 EXREF 0.00 ppm  
 BF 0.12 Hz  
 RGAIN 46

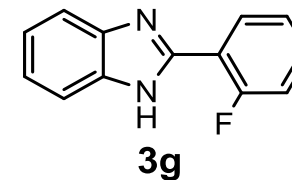

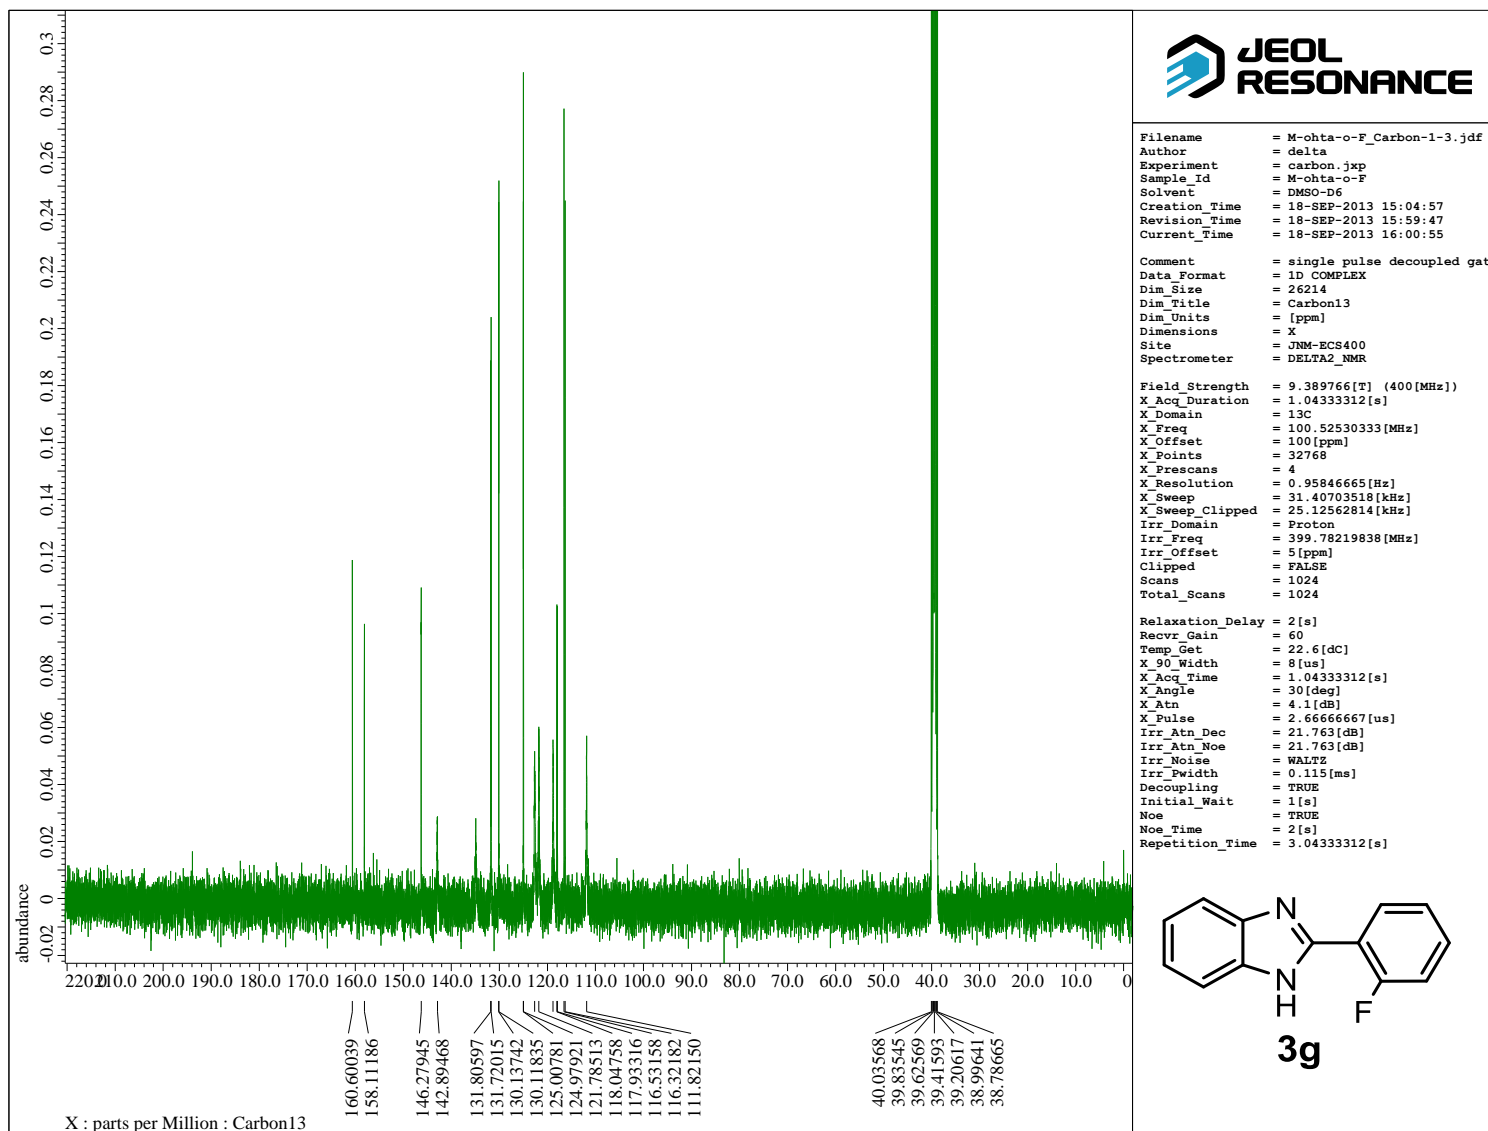

single\_pulse

G:\fmani\MI23-fr1-6\_Proton-1-1.als

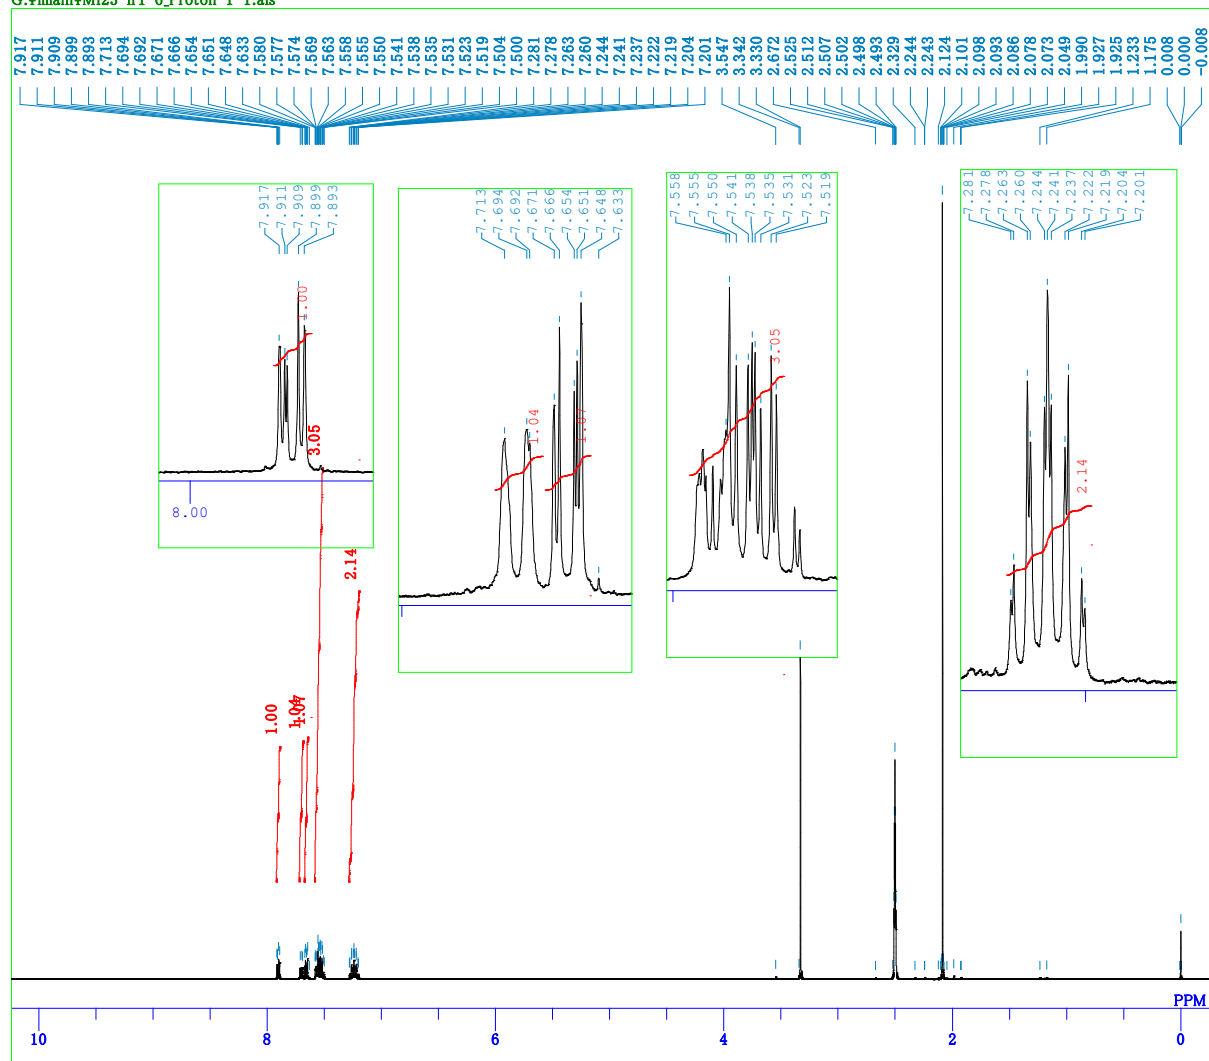

DFILE MI23-fr1-6\_Proton-1-1.als  
COMNT single\_pulse  
DATIM 07-03-2013 13:15:58  
OBNUC 1H  
EXMOD proton.jxp  
OBFREQ 399.78 MHz  
OBSET 4.19 KHz  
OBFIN 7.29 Hz  
POINT 52428  
FREQU 6002.40 Hz  
SCANS 8  
ACQTM 8.7346 sec  
PD 5.0000 sec  
PW1 4.91 usec  
IRNUC 1H  
CTEMP 22.1 c  
SLVNT DMSO  
EXREF 0.00 ppm  
BF 0.12 Hz  
RGAIN 44

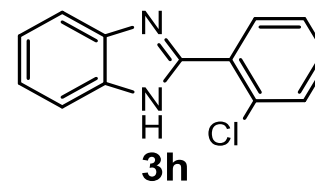

single pulse decoupled gated NOE

G:\imani\M-MI-23\_Carbon-1-1.als

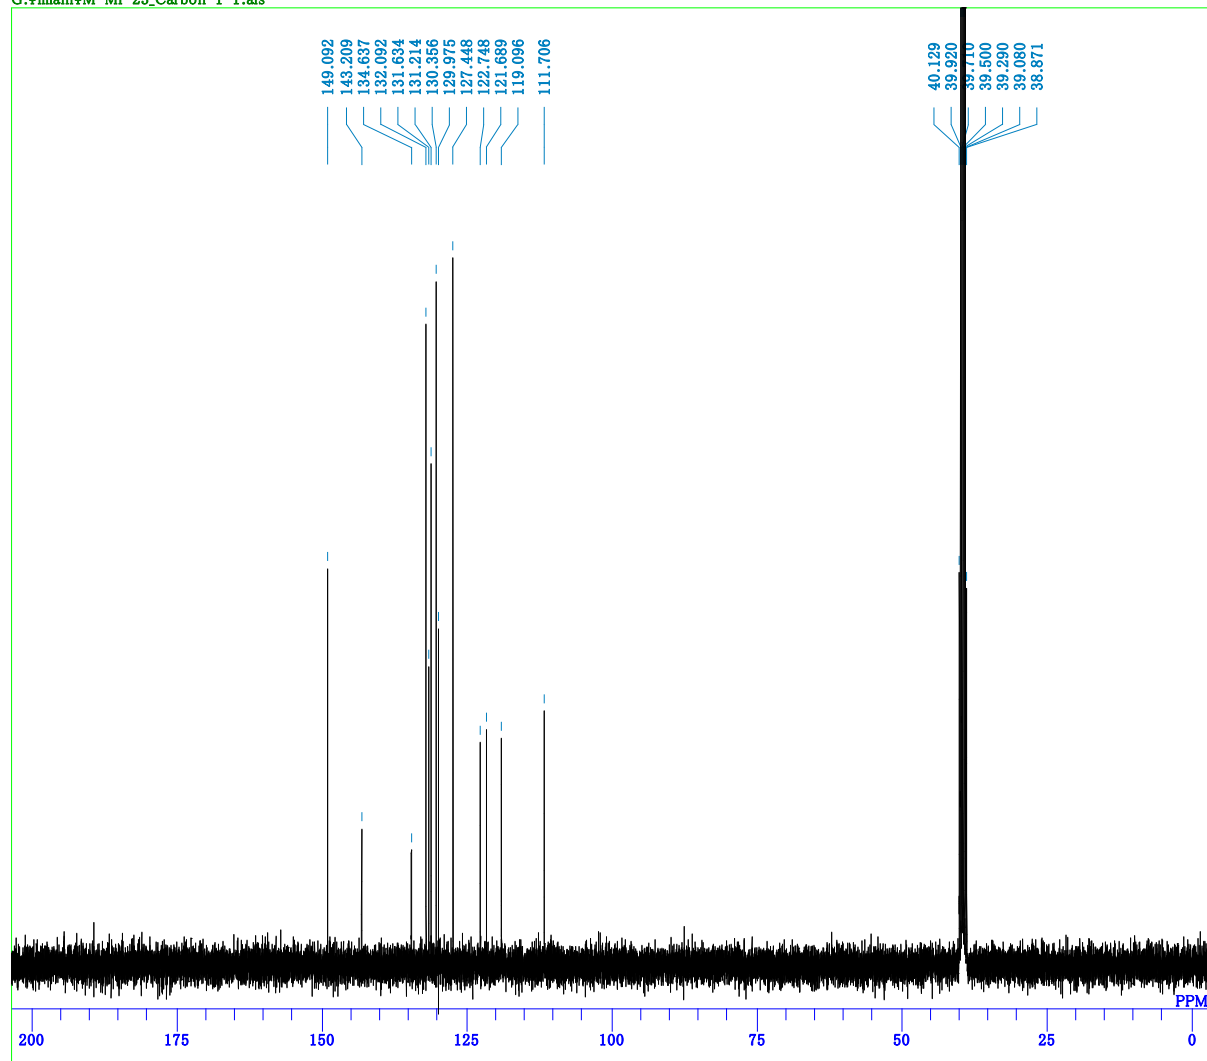

DFILE M-MI-23\_Carbon-1-1.als  
COMNT single pulse decoupled gated NOE  
DATIM 06-06-2013 09:21:36  
OBNUC 13C  
EXMOD carbon\_jrp  
OBFRQ 100.53 MHz  
OBSET 5.35 KHz  
OBFIN 5.86 Hz  
POINT 26214  
FREQU 25125.63 Hz  
SCANS 299  
ACQTM 1.0433 sec  
PD 2.0000 sec  
PW1 2.67 usec  
IRNUC 1H  
CTEMP 20.8 c  
SLVNT DMSO  
EXREF 39.50 ppm  
BF 0.00 Hz  
RGAIN 60

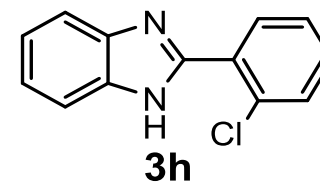





single pulse decoupled gated NOE

G:\imani\M-MI-22\_Carbon-1-1.als

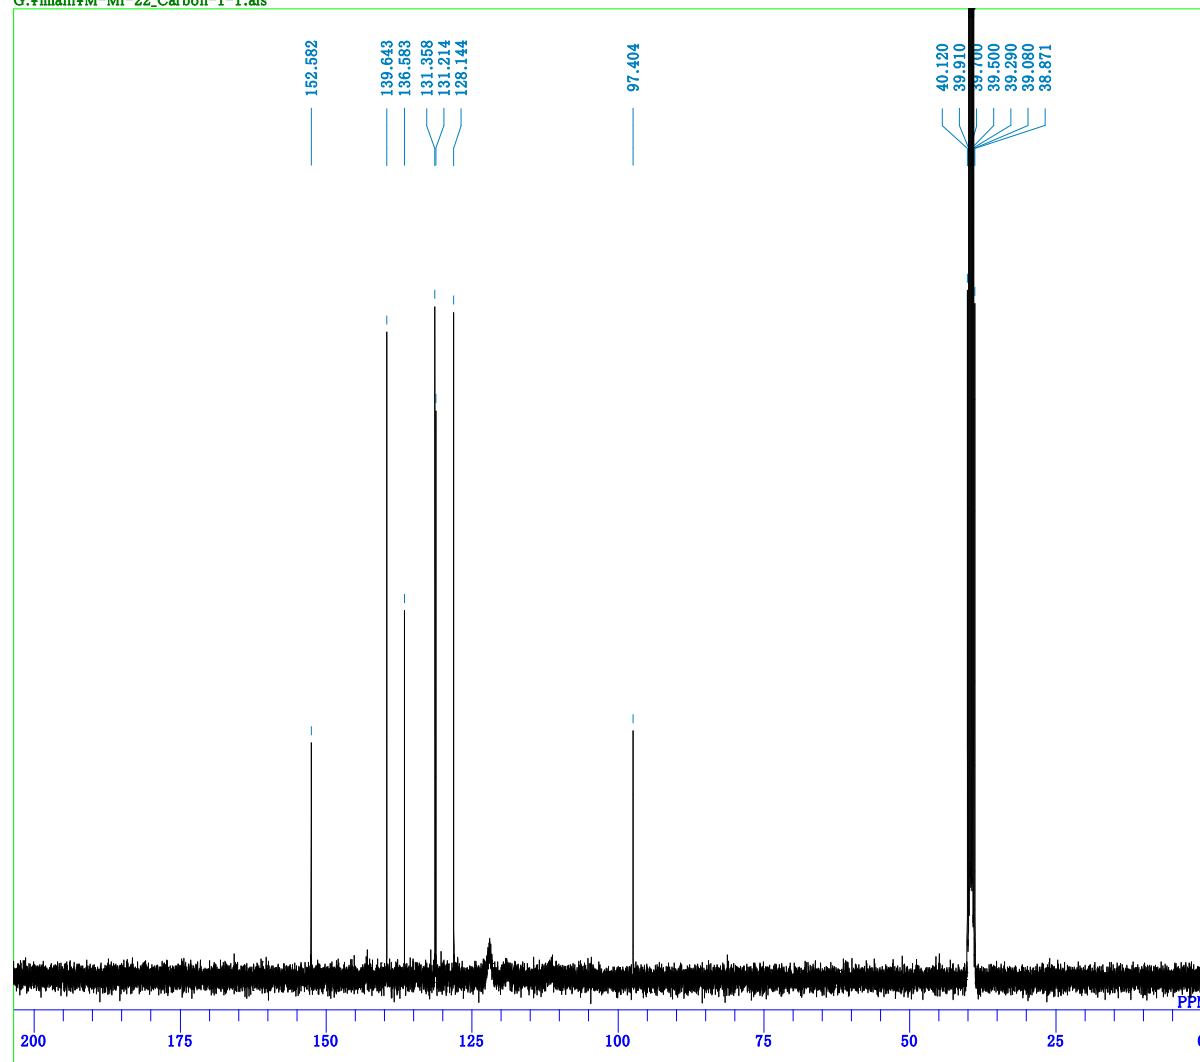

DFILE M-MI-22\_Carbon-1-1.als  
COMNT single pulse decoupled gated NOE  
DATIM 06-06-2013 06:41:27  
OBNUC 13C  
EXMOD carbon\_jrp  
OBFRQ 100.53 MHz  
OBSET 5.35 KHz  
OBFIN 5.86 Hz  
POINT 26214  
FREQU 25125.63 Hz  
SCANS 3000  
ACQTM 1.0433 sec  
PD 2.0000 sec  
PW1 2.67 usec  
IRNUC 1H  
CTEMP 20.8 c  
SLVNT DMSO  
EXREF 39.50 ppm  
BF 0.00 Hz  
RGAIN 60

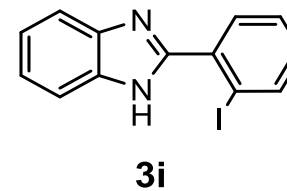

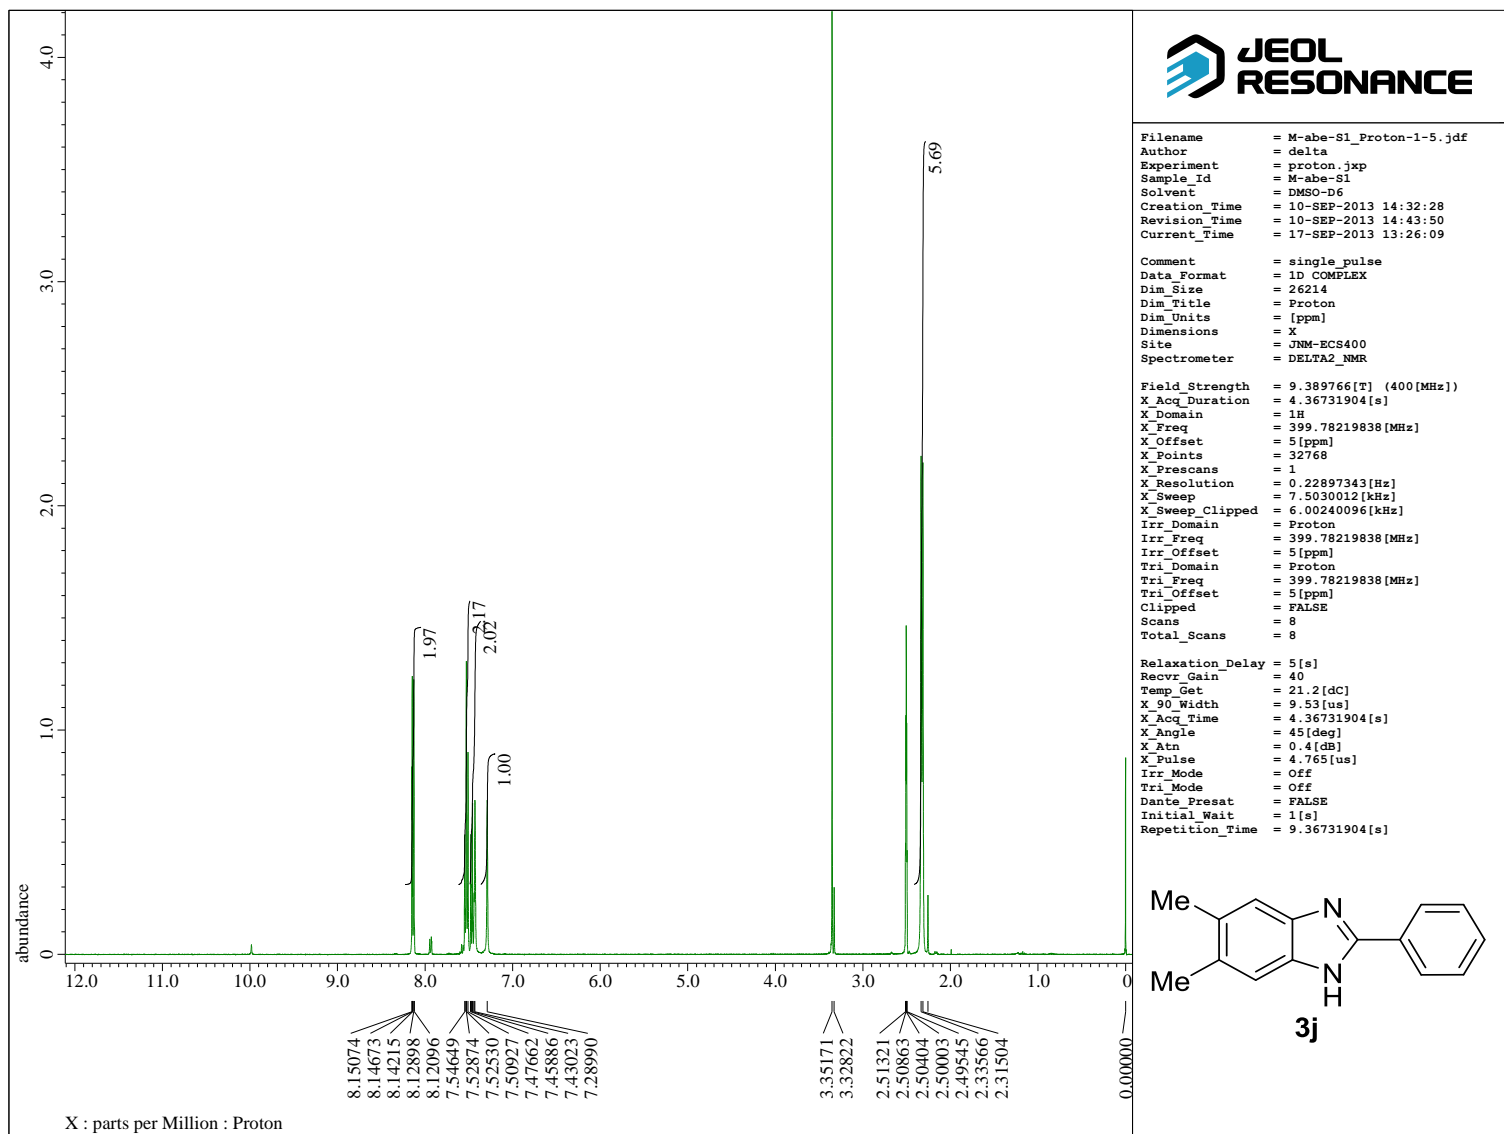

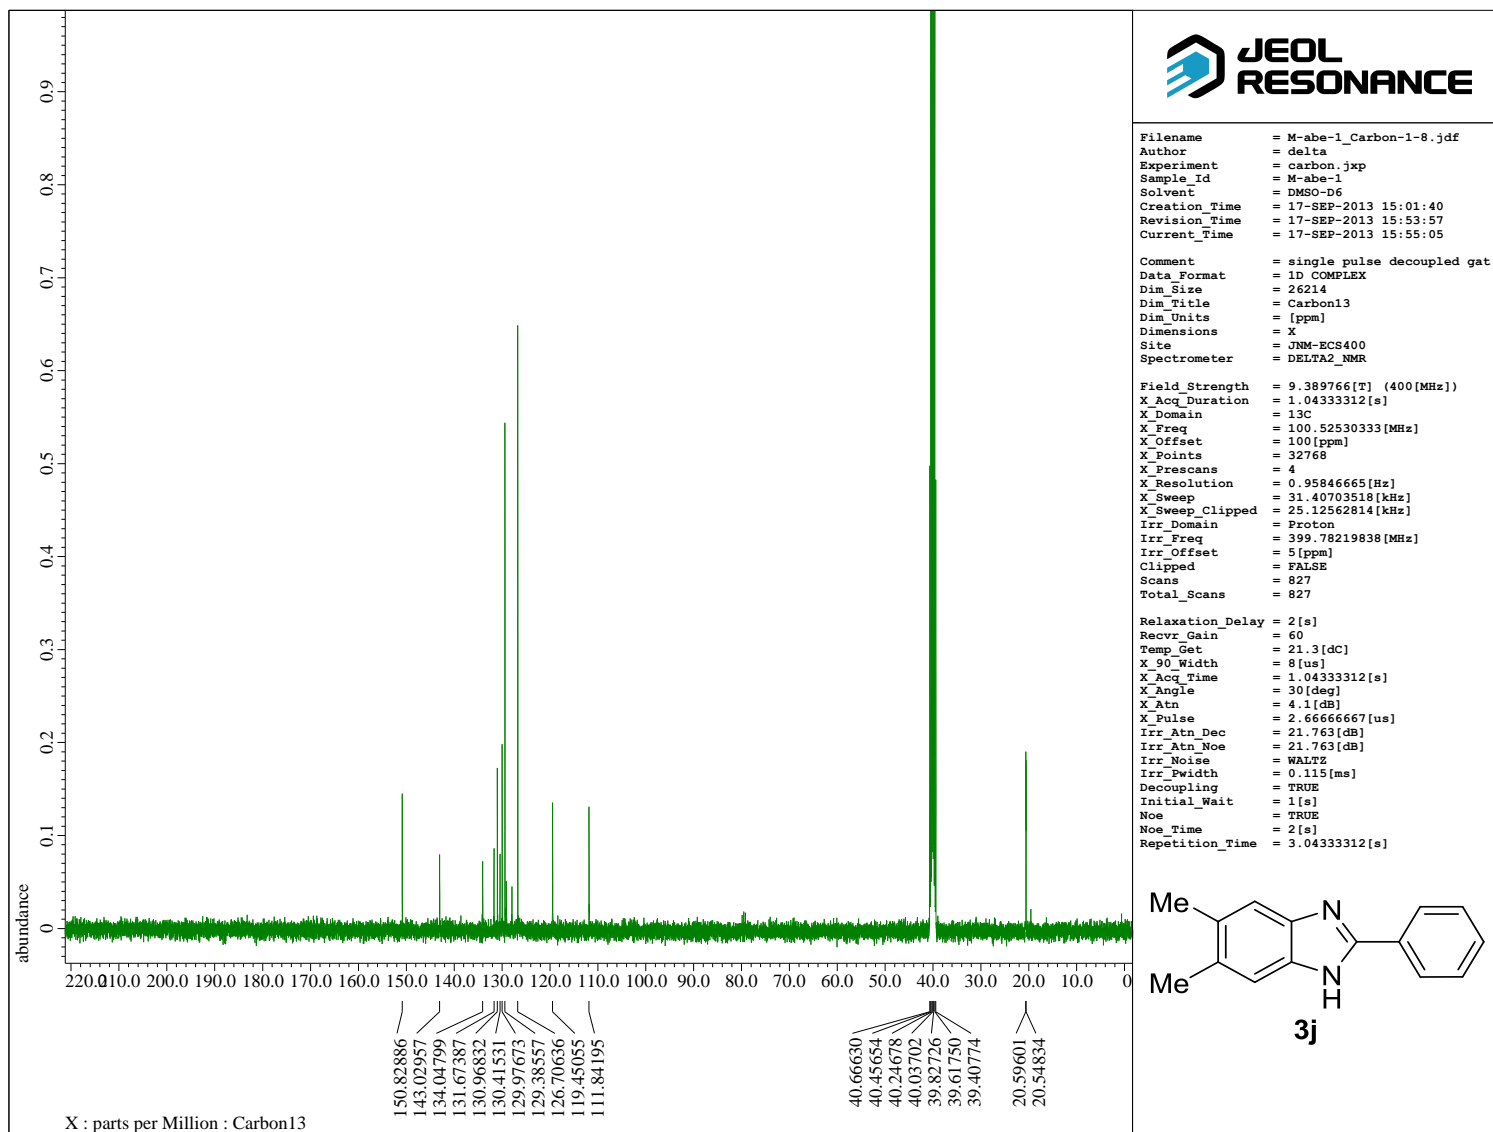

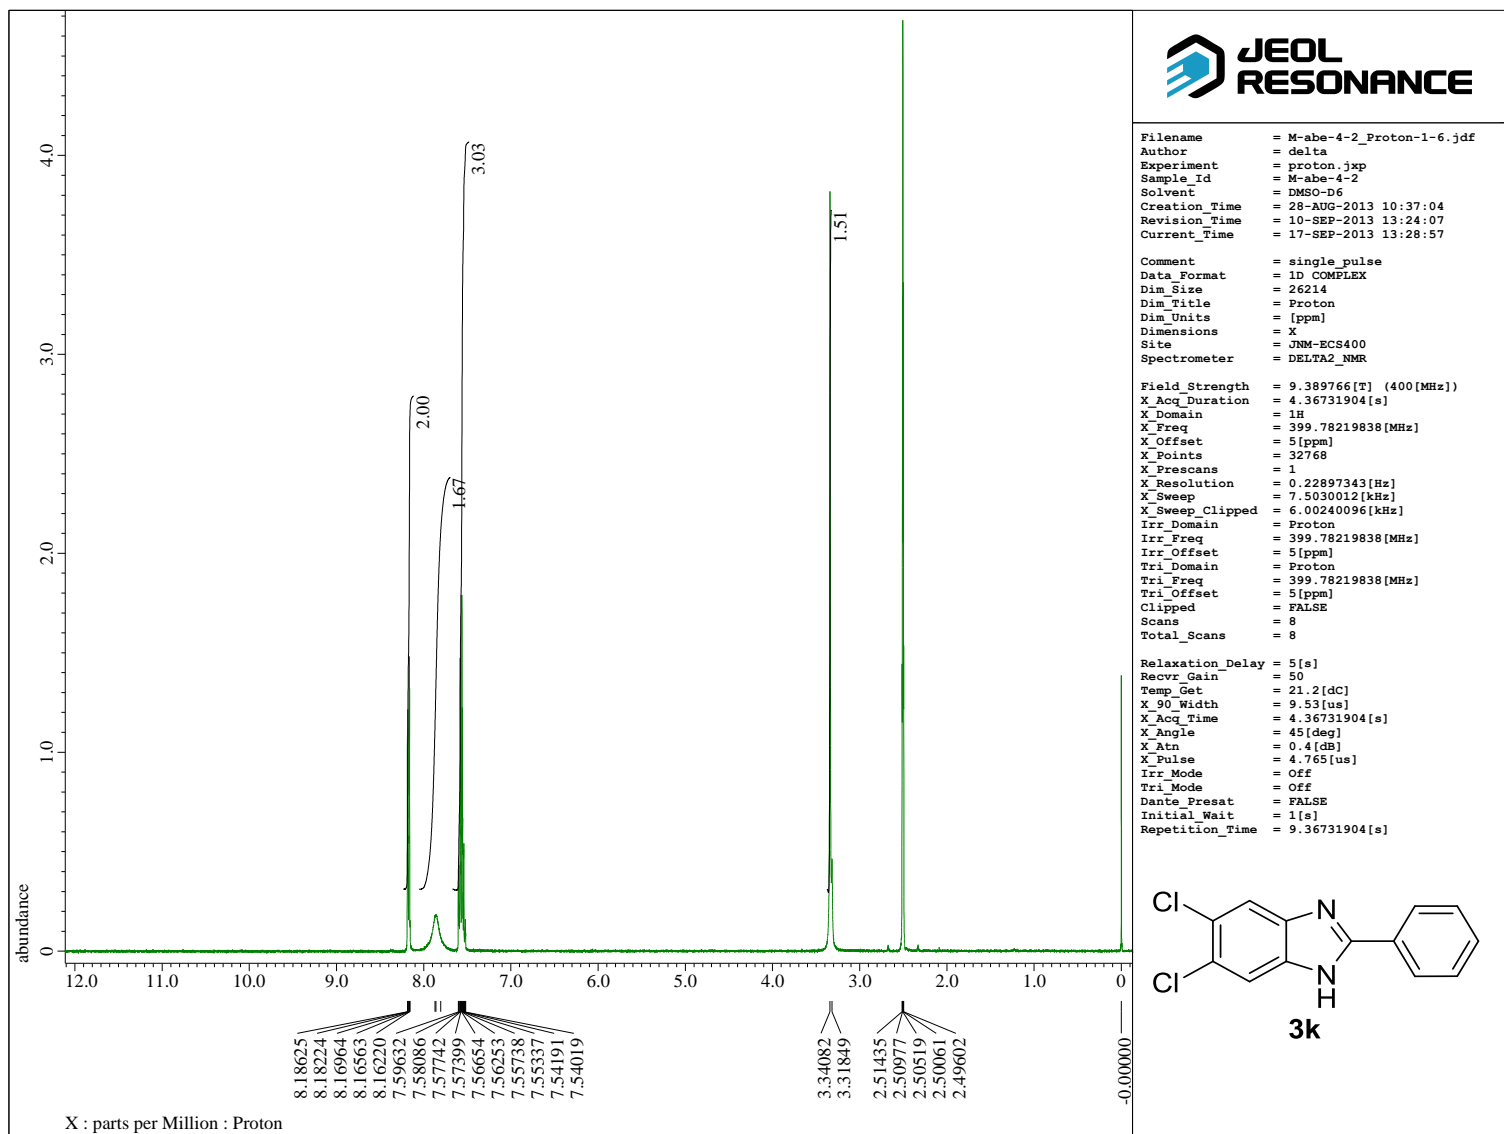

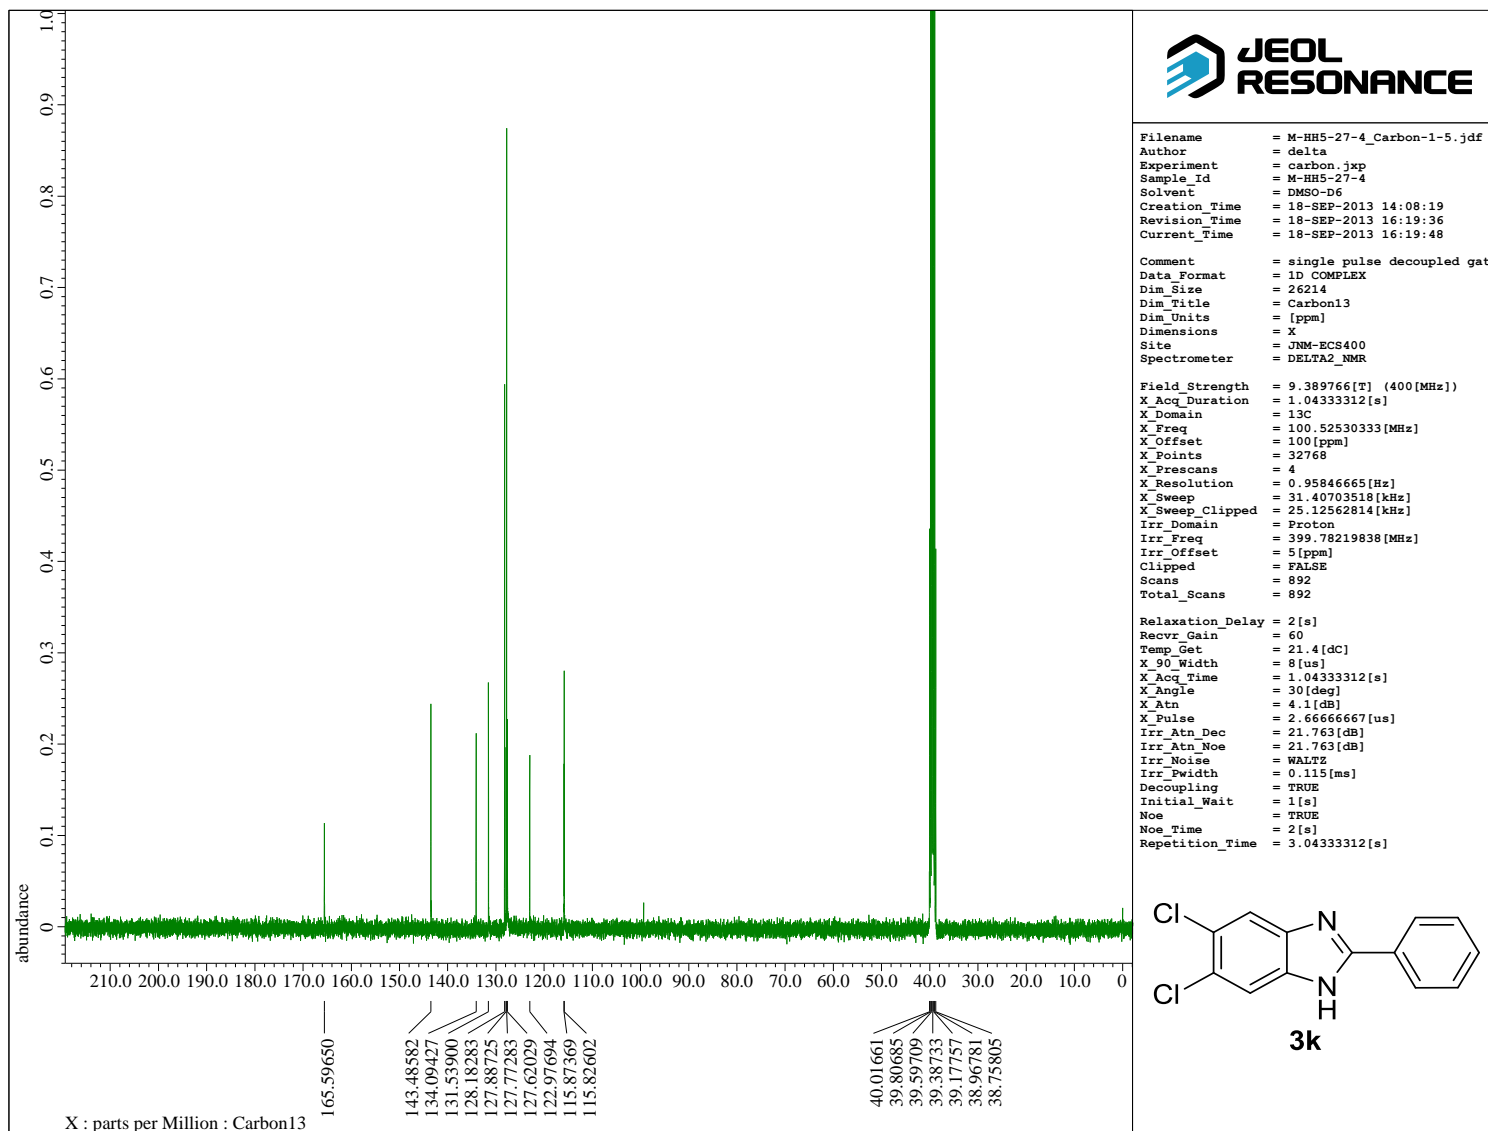

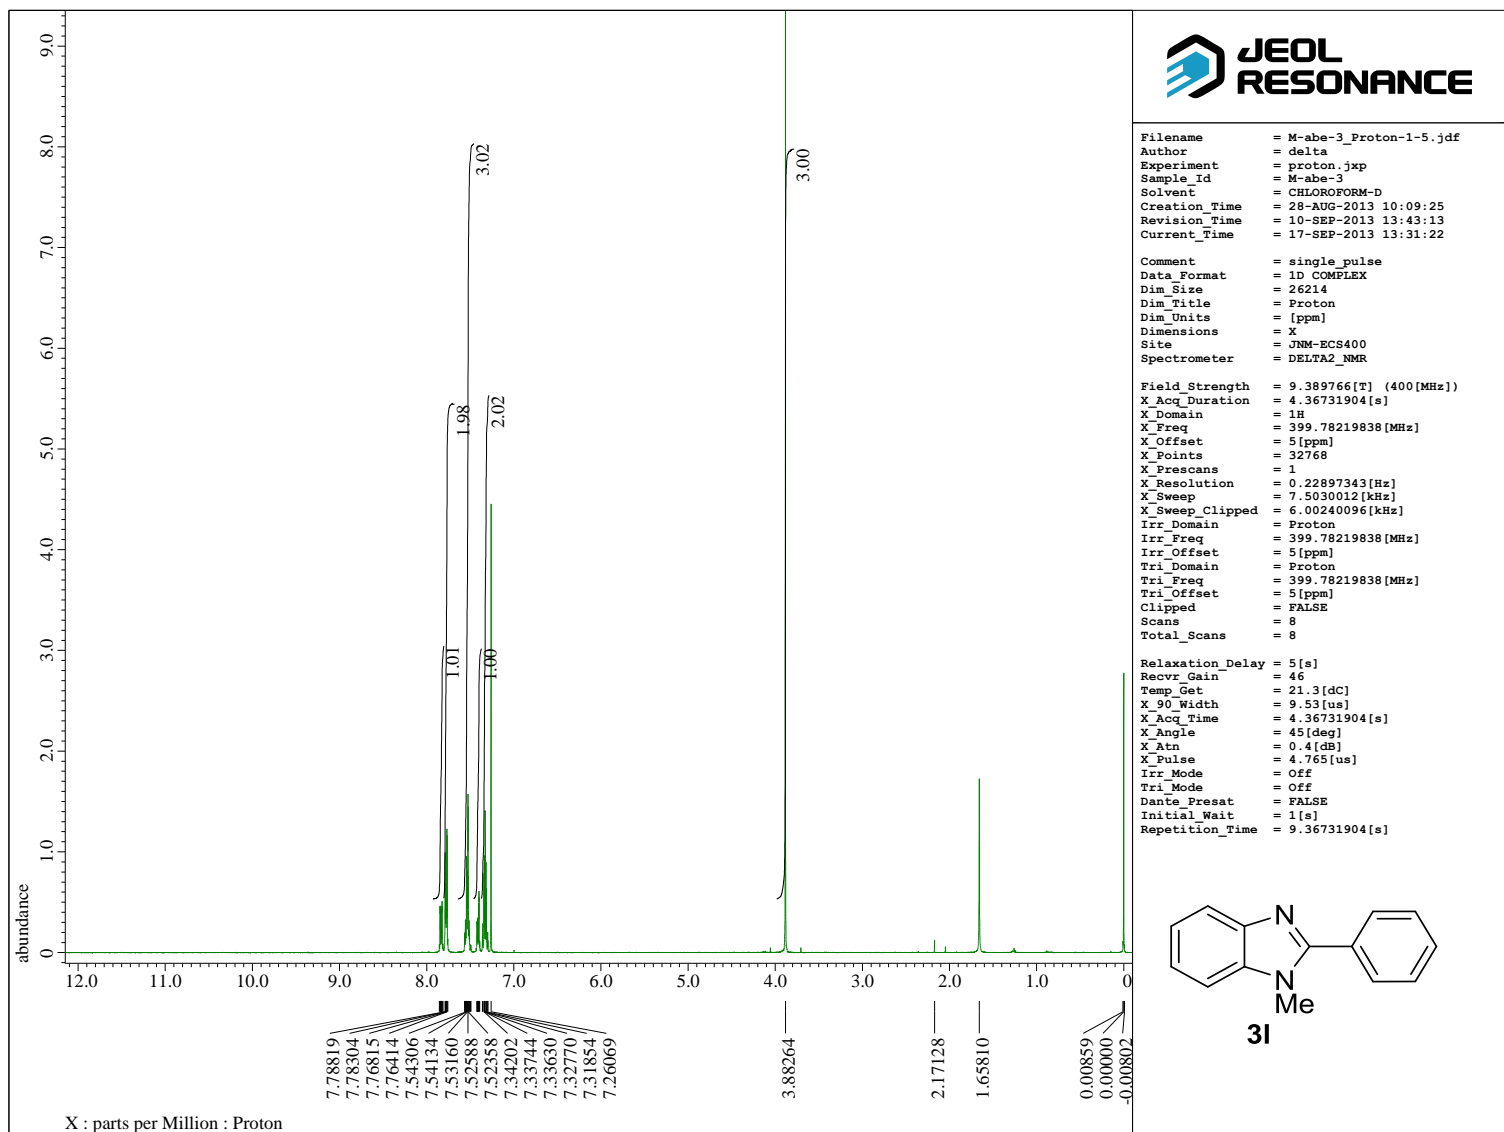

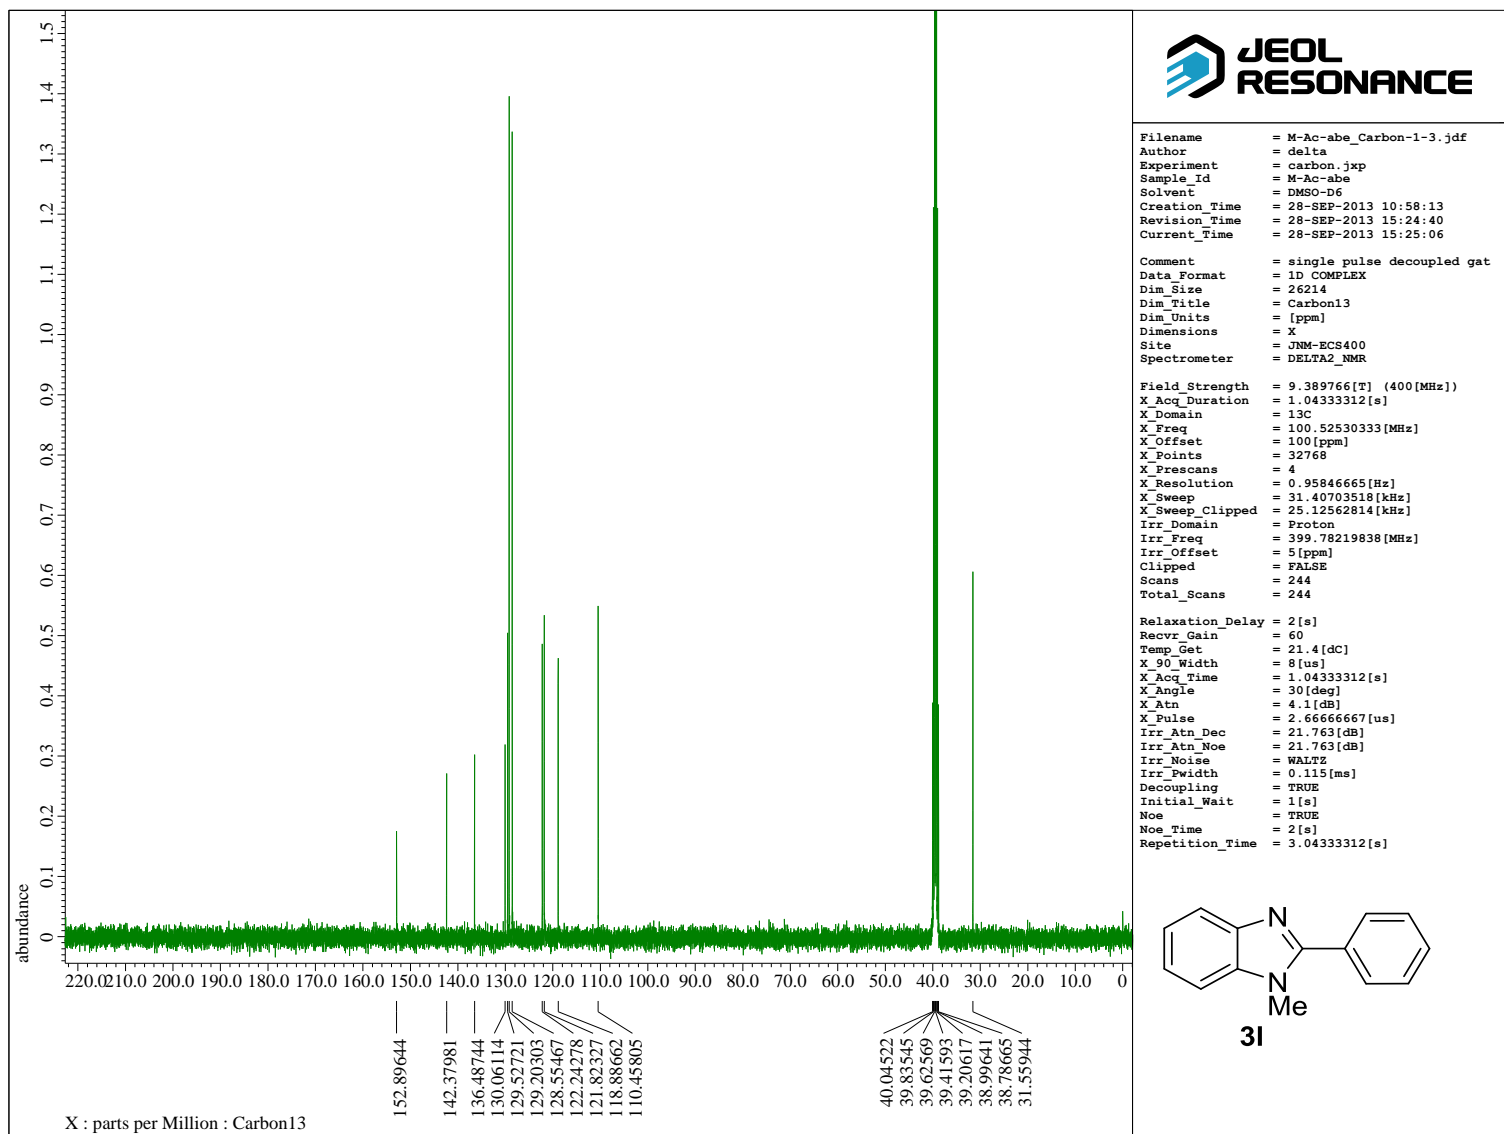

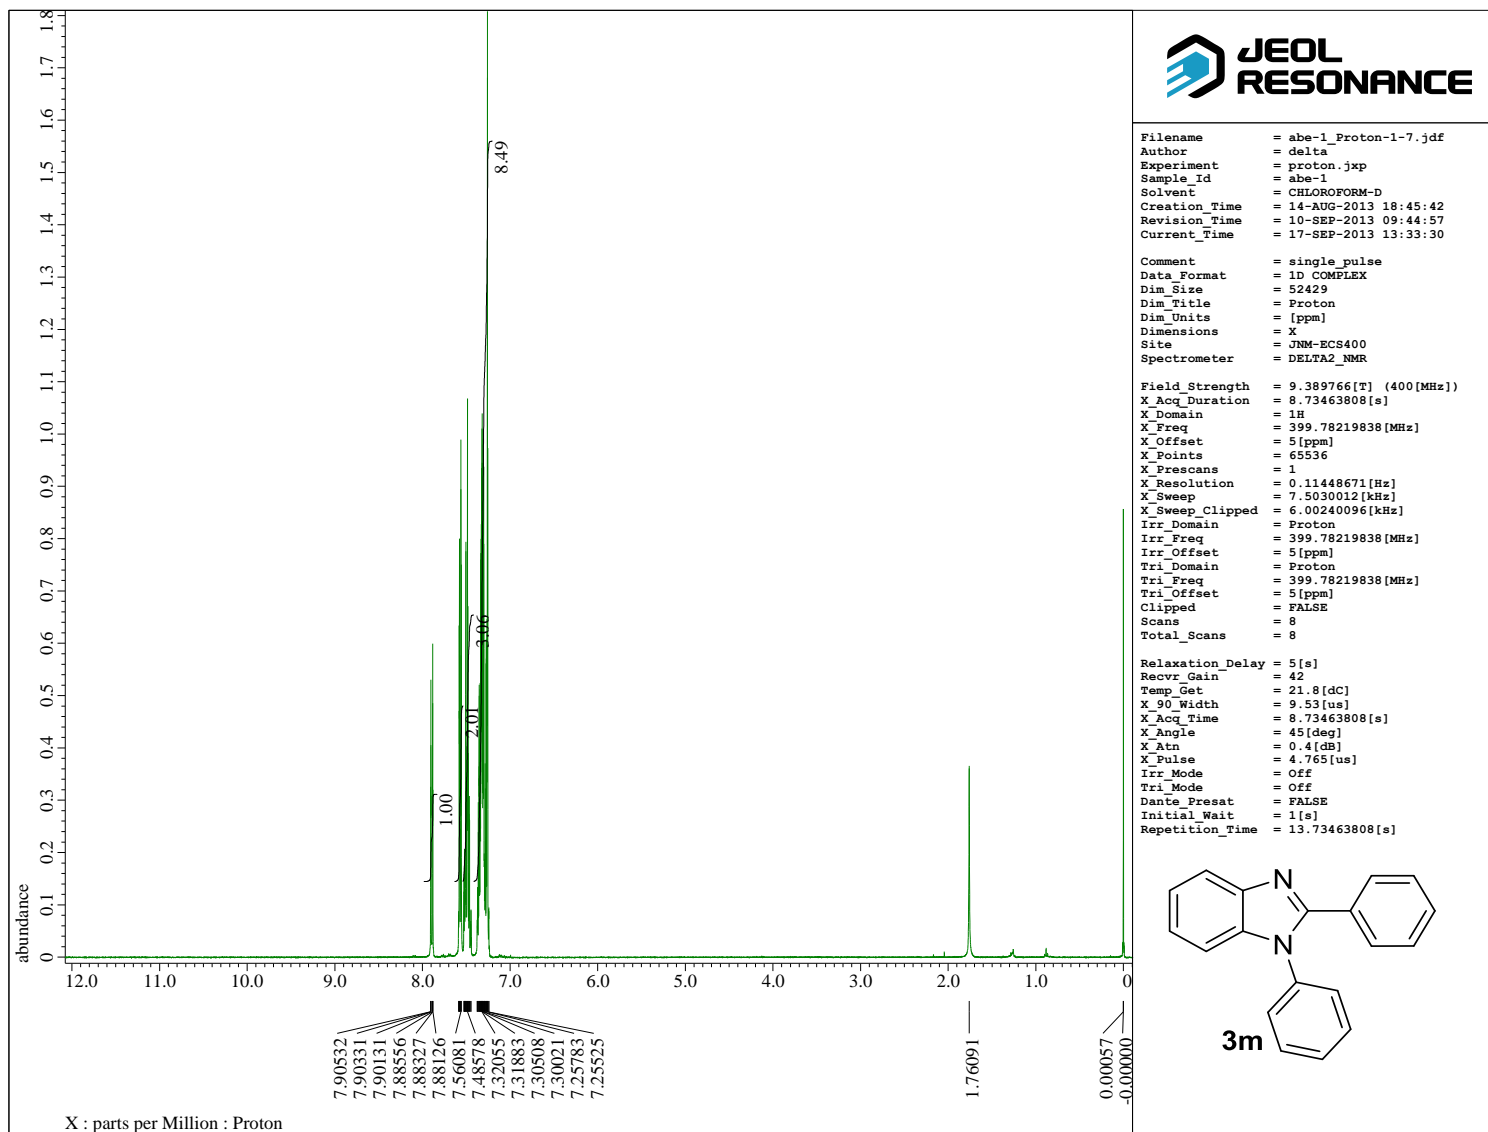



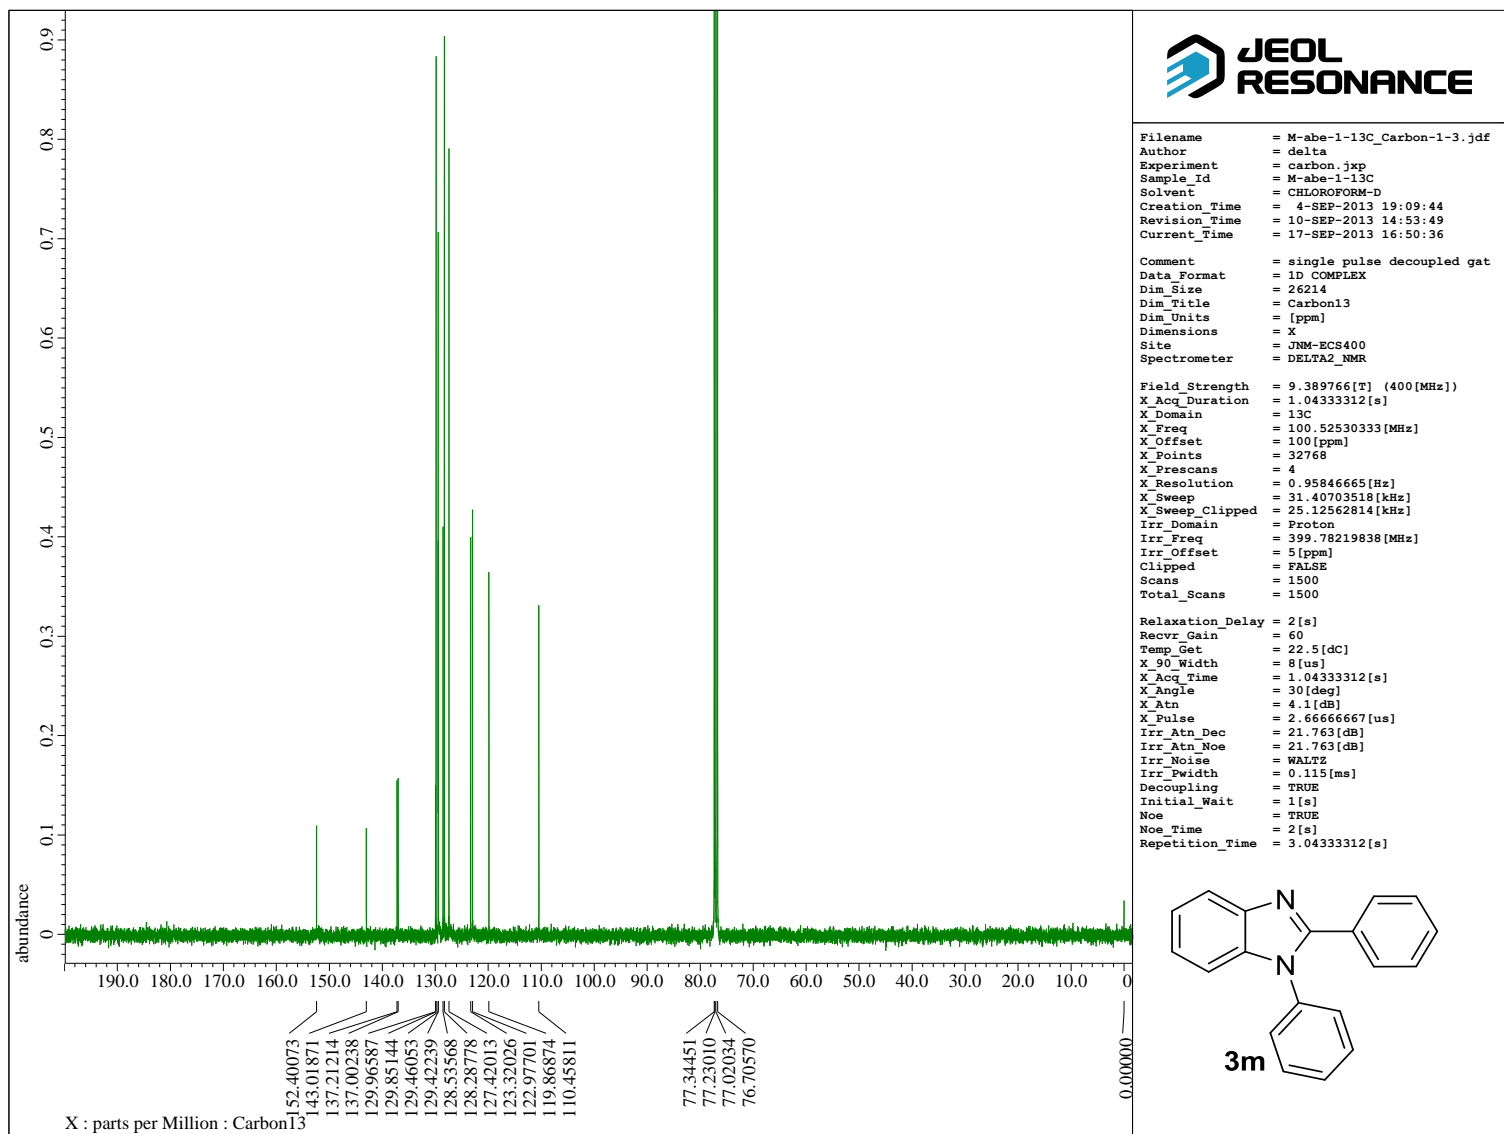

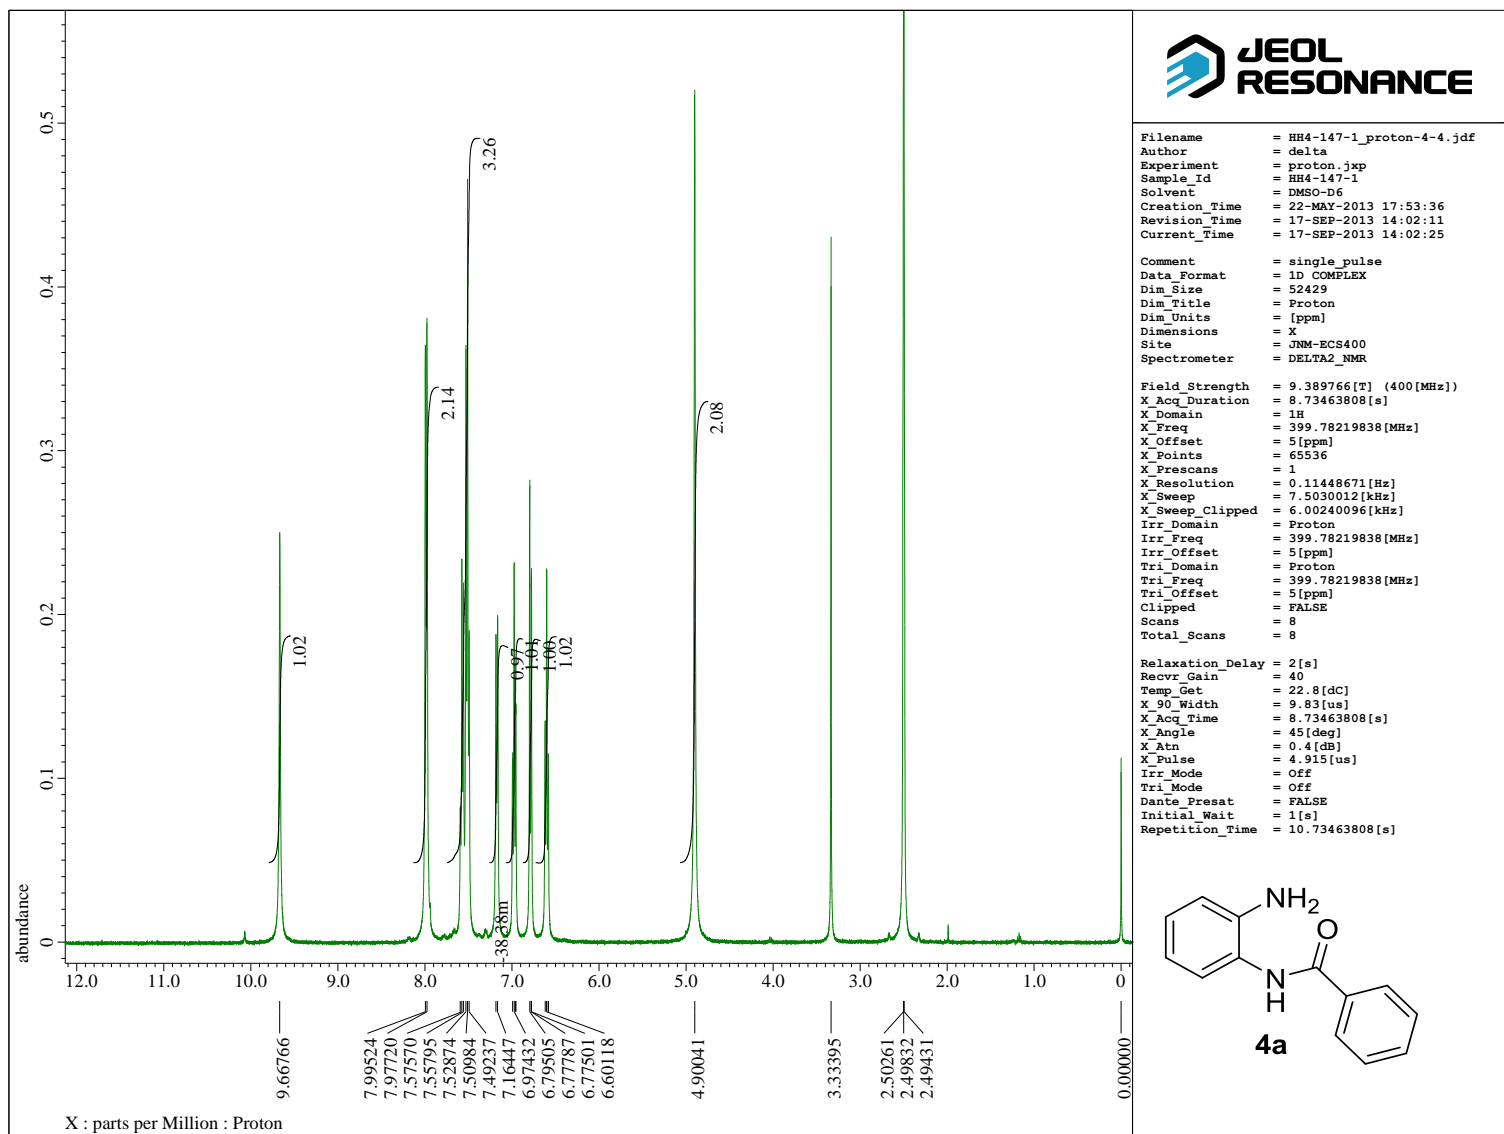

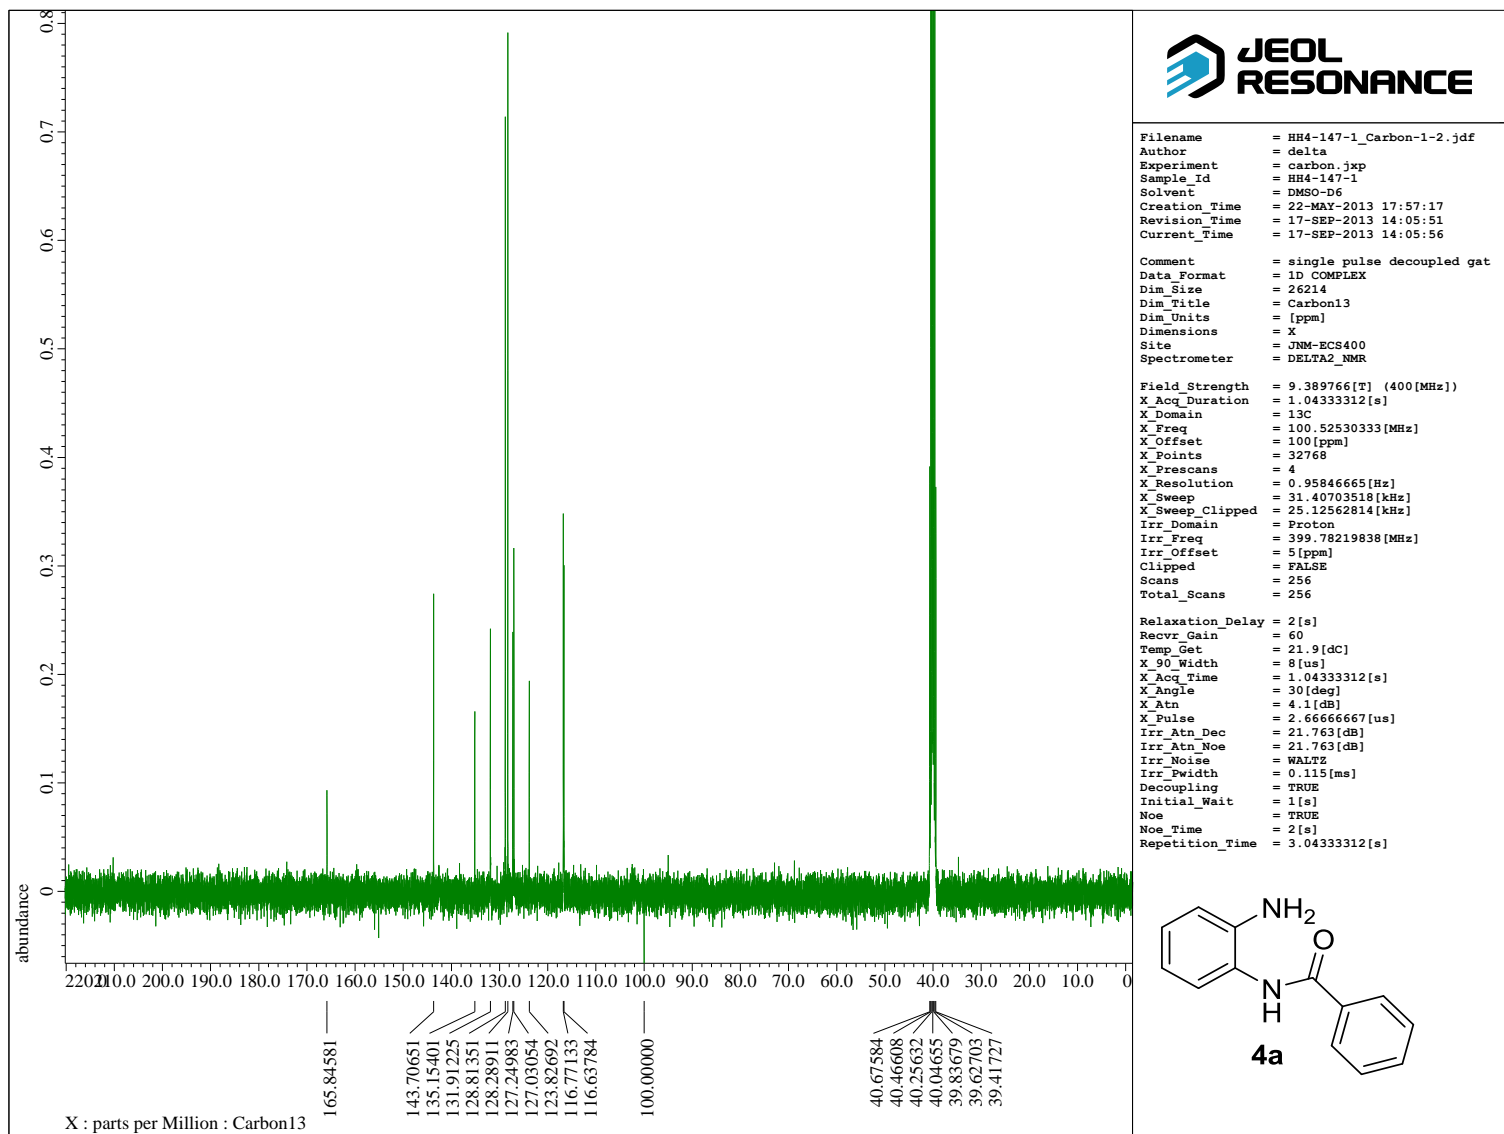

Supplement: c3ra46749j.pdf [file c3ra46749j.pdf]
